# Supplementary material for: Cell diversity and plasticity during atrioventricular heart valve EMTs
Source: PubMed Central journal article supplement (PMC10492828; doi:10.1038/s41467-023-41279-6), 2023-09-09
Supplement: 41467_2023_41279_MOESM1_ESM.pdf [file 41467_2023_41279_MOESM1_ESM.pdf]

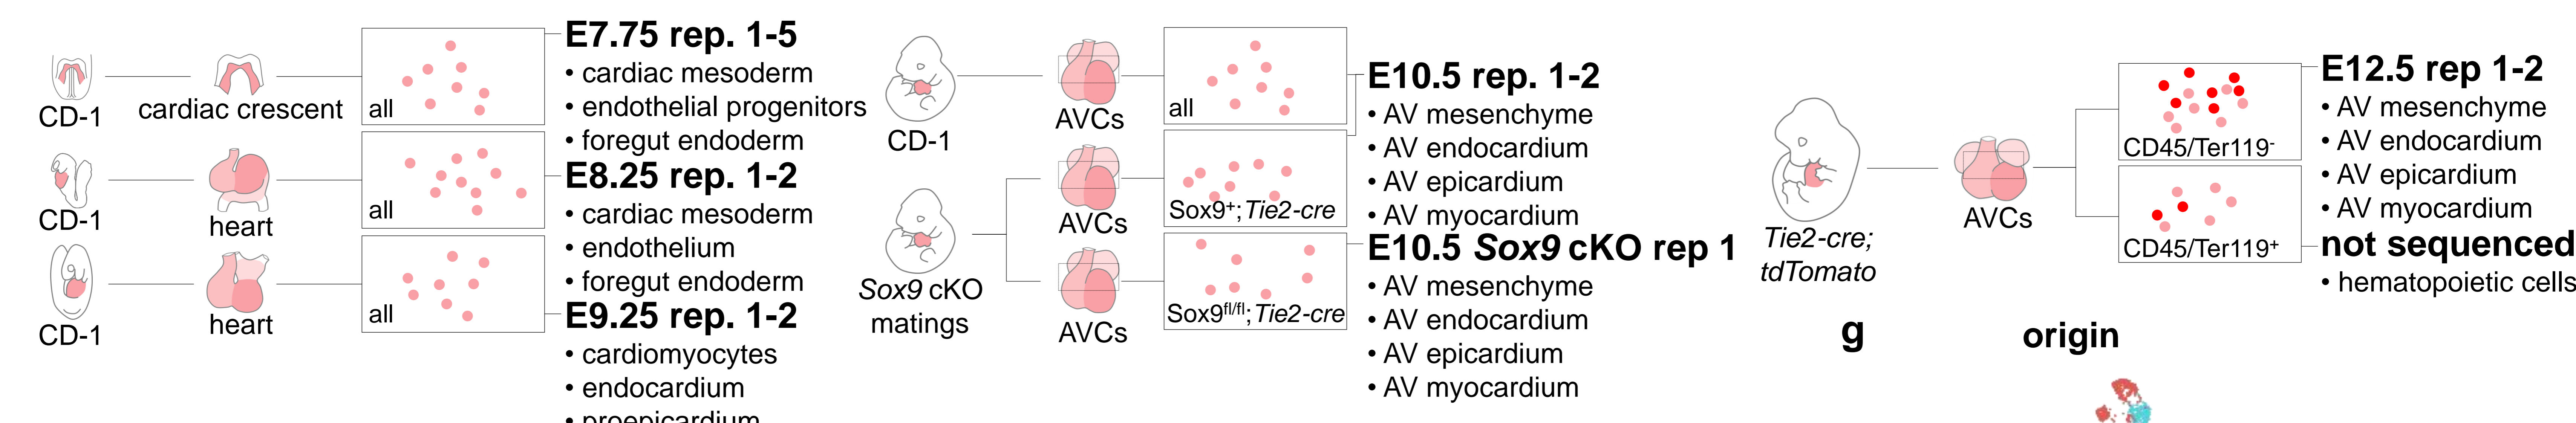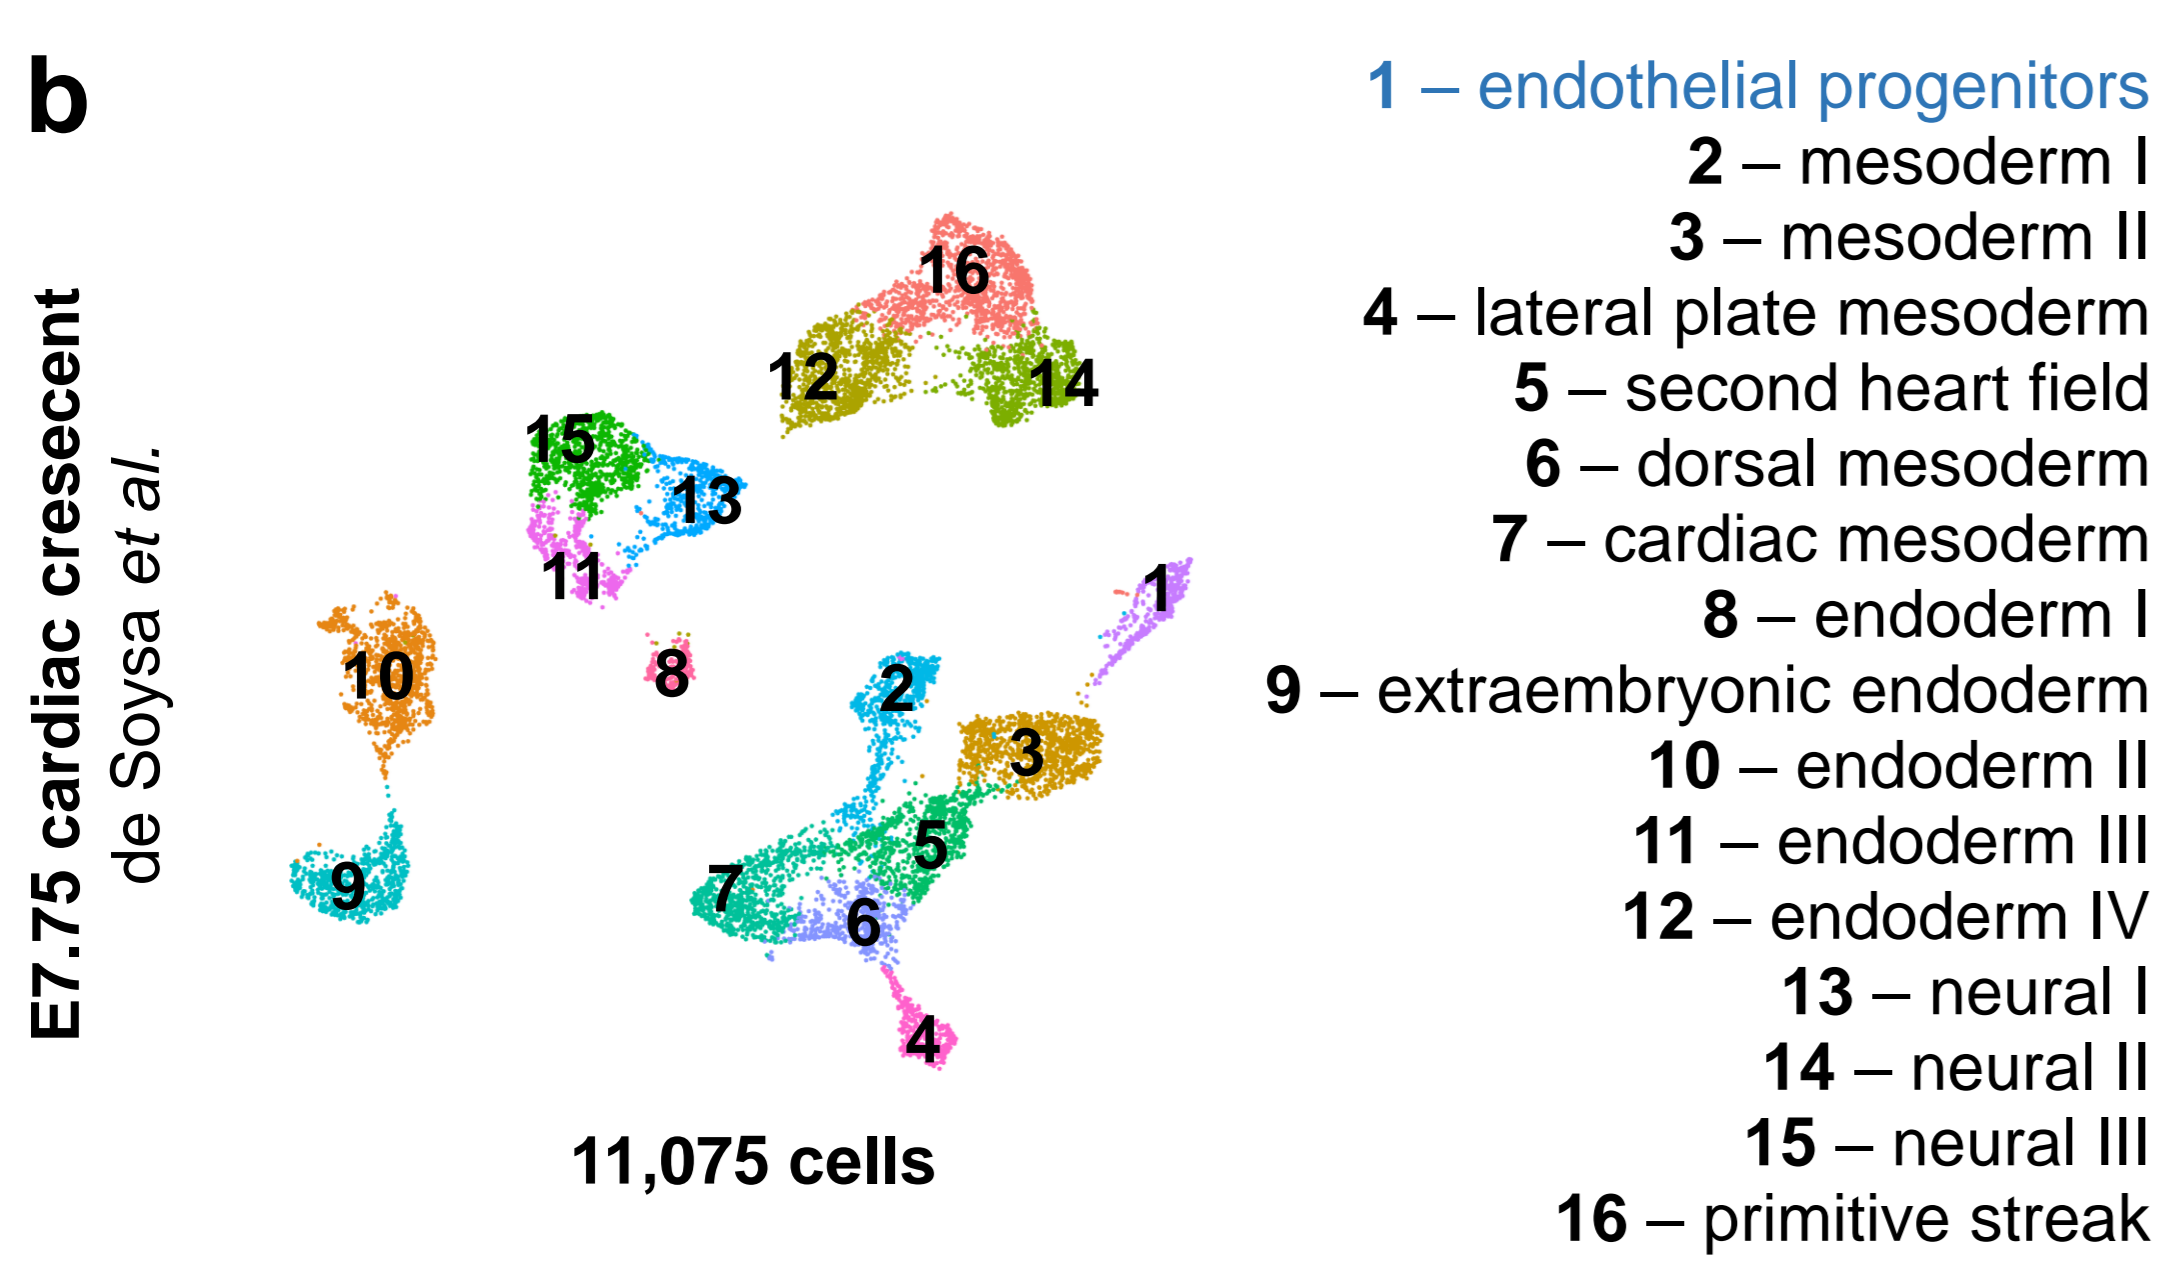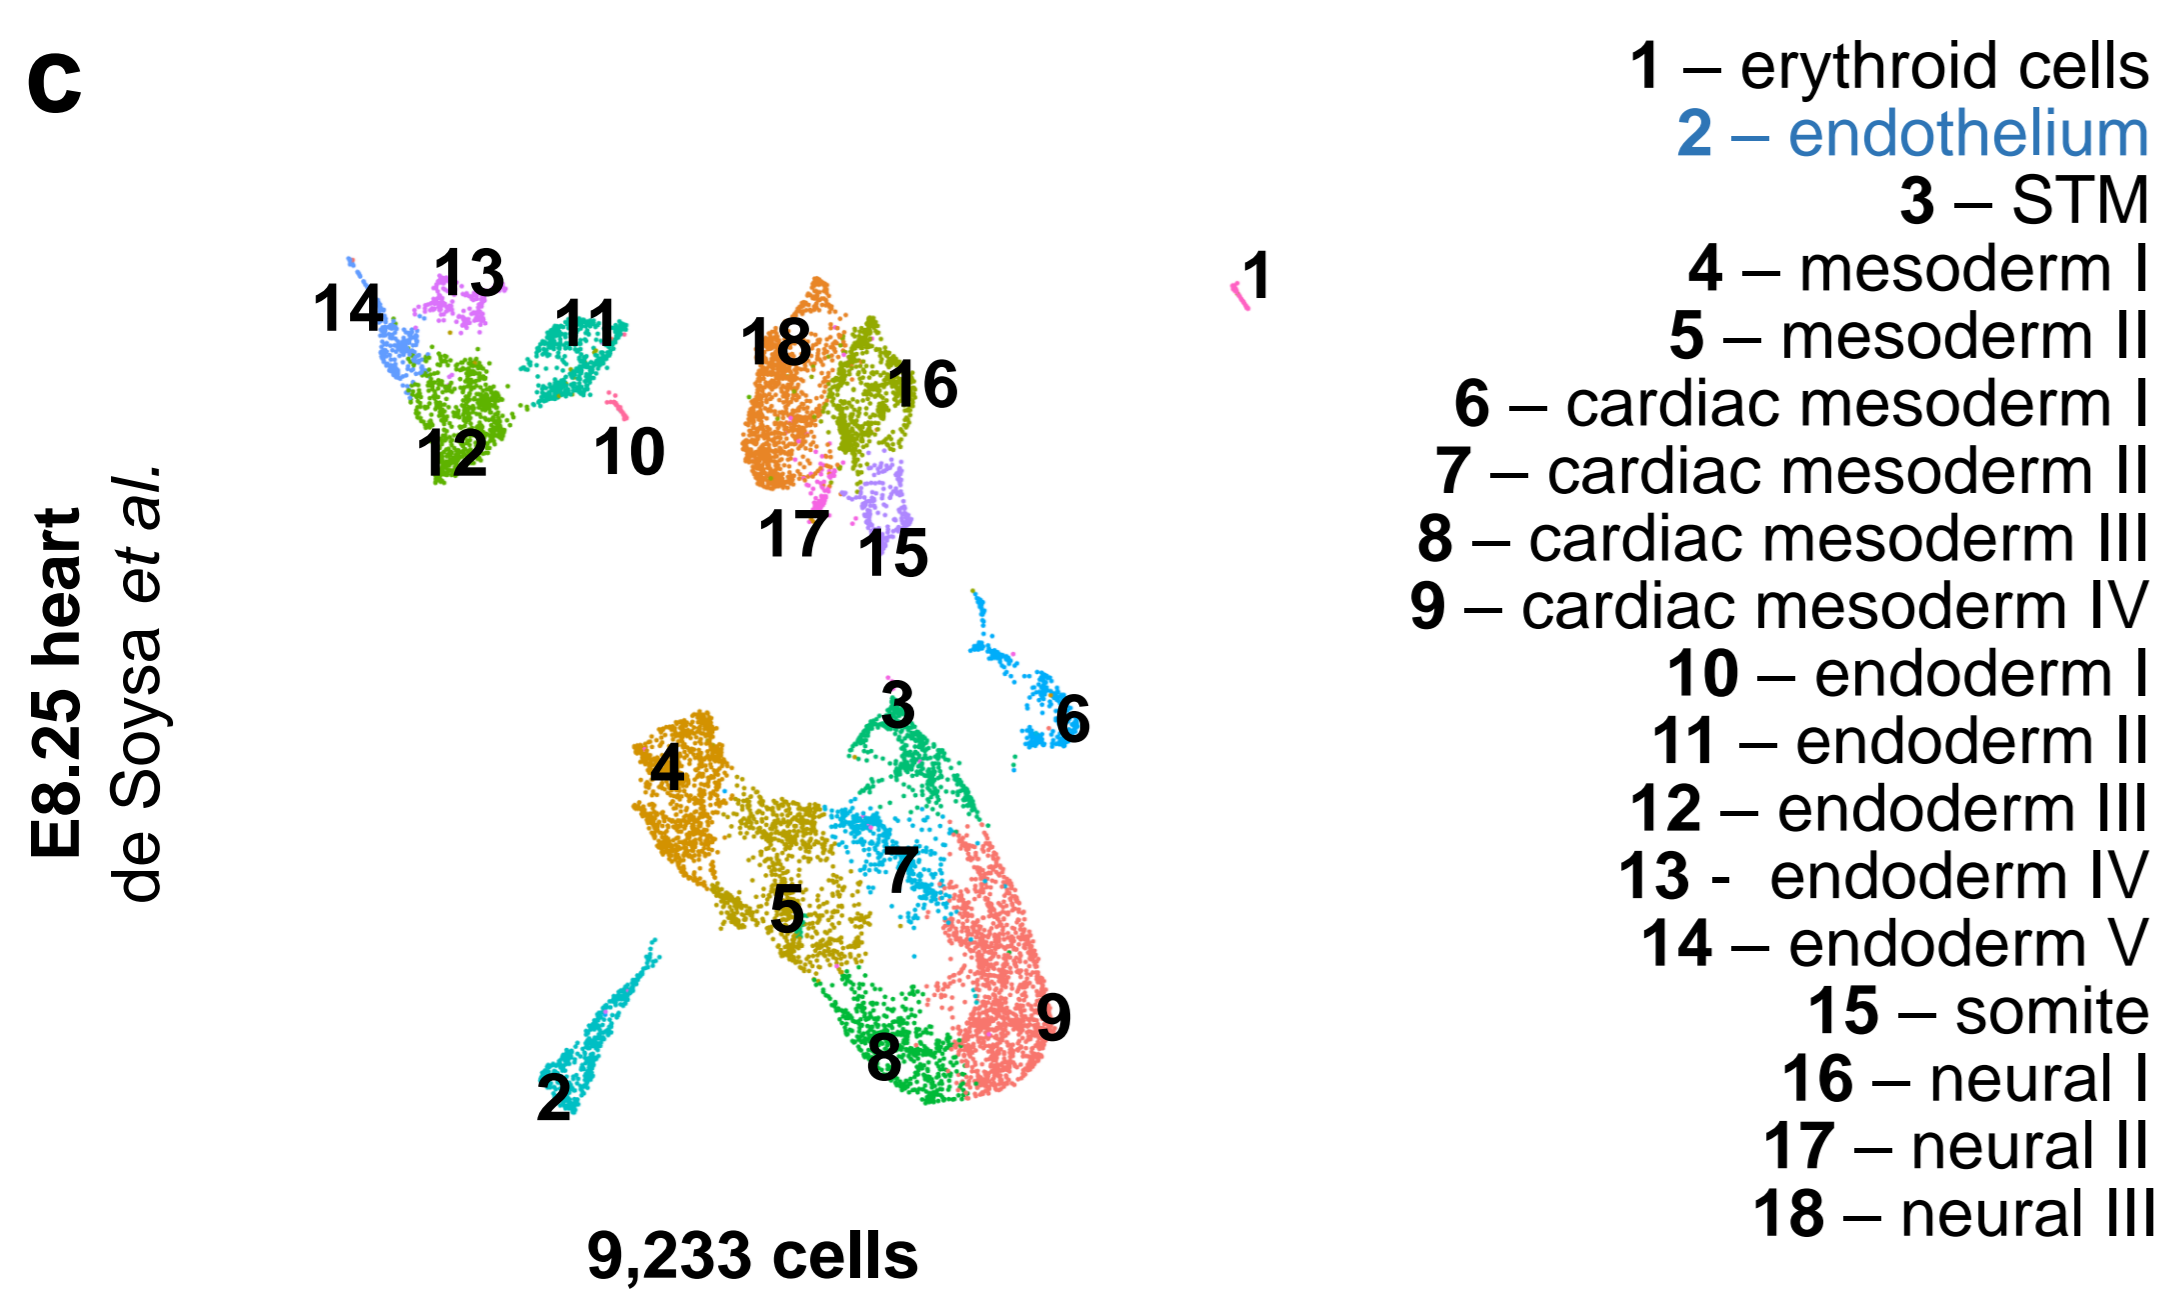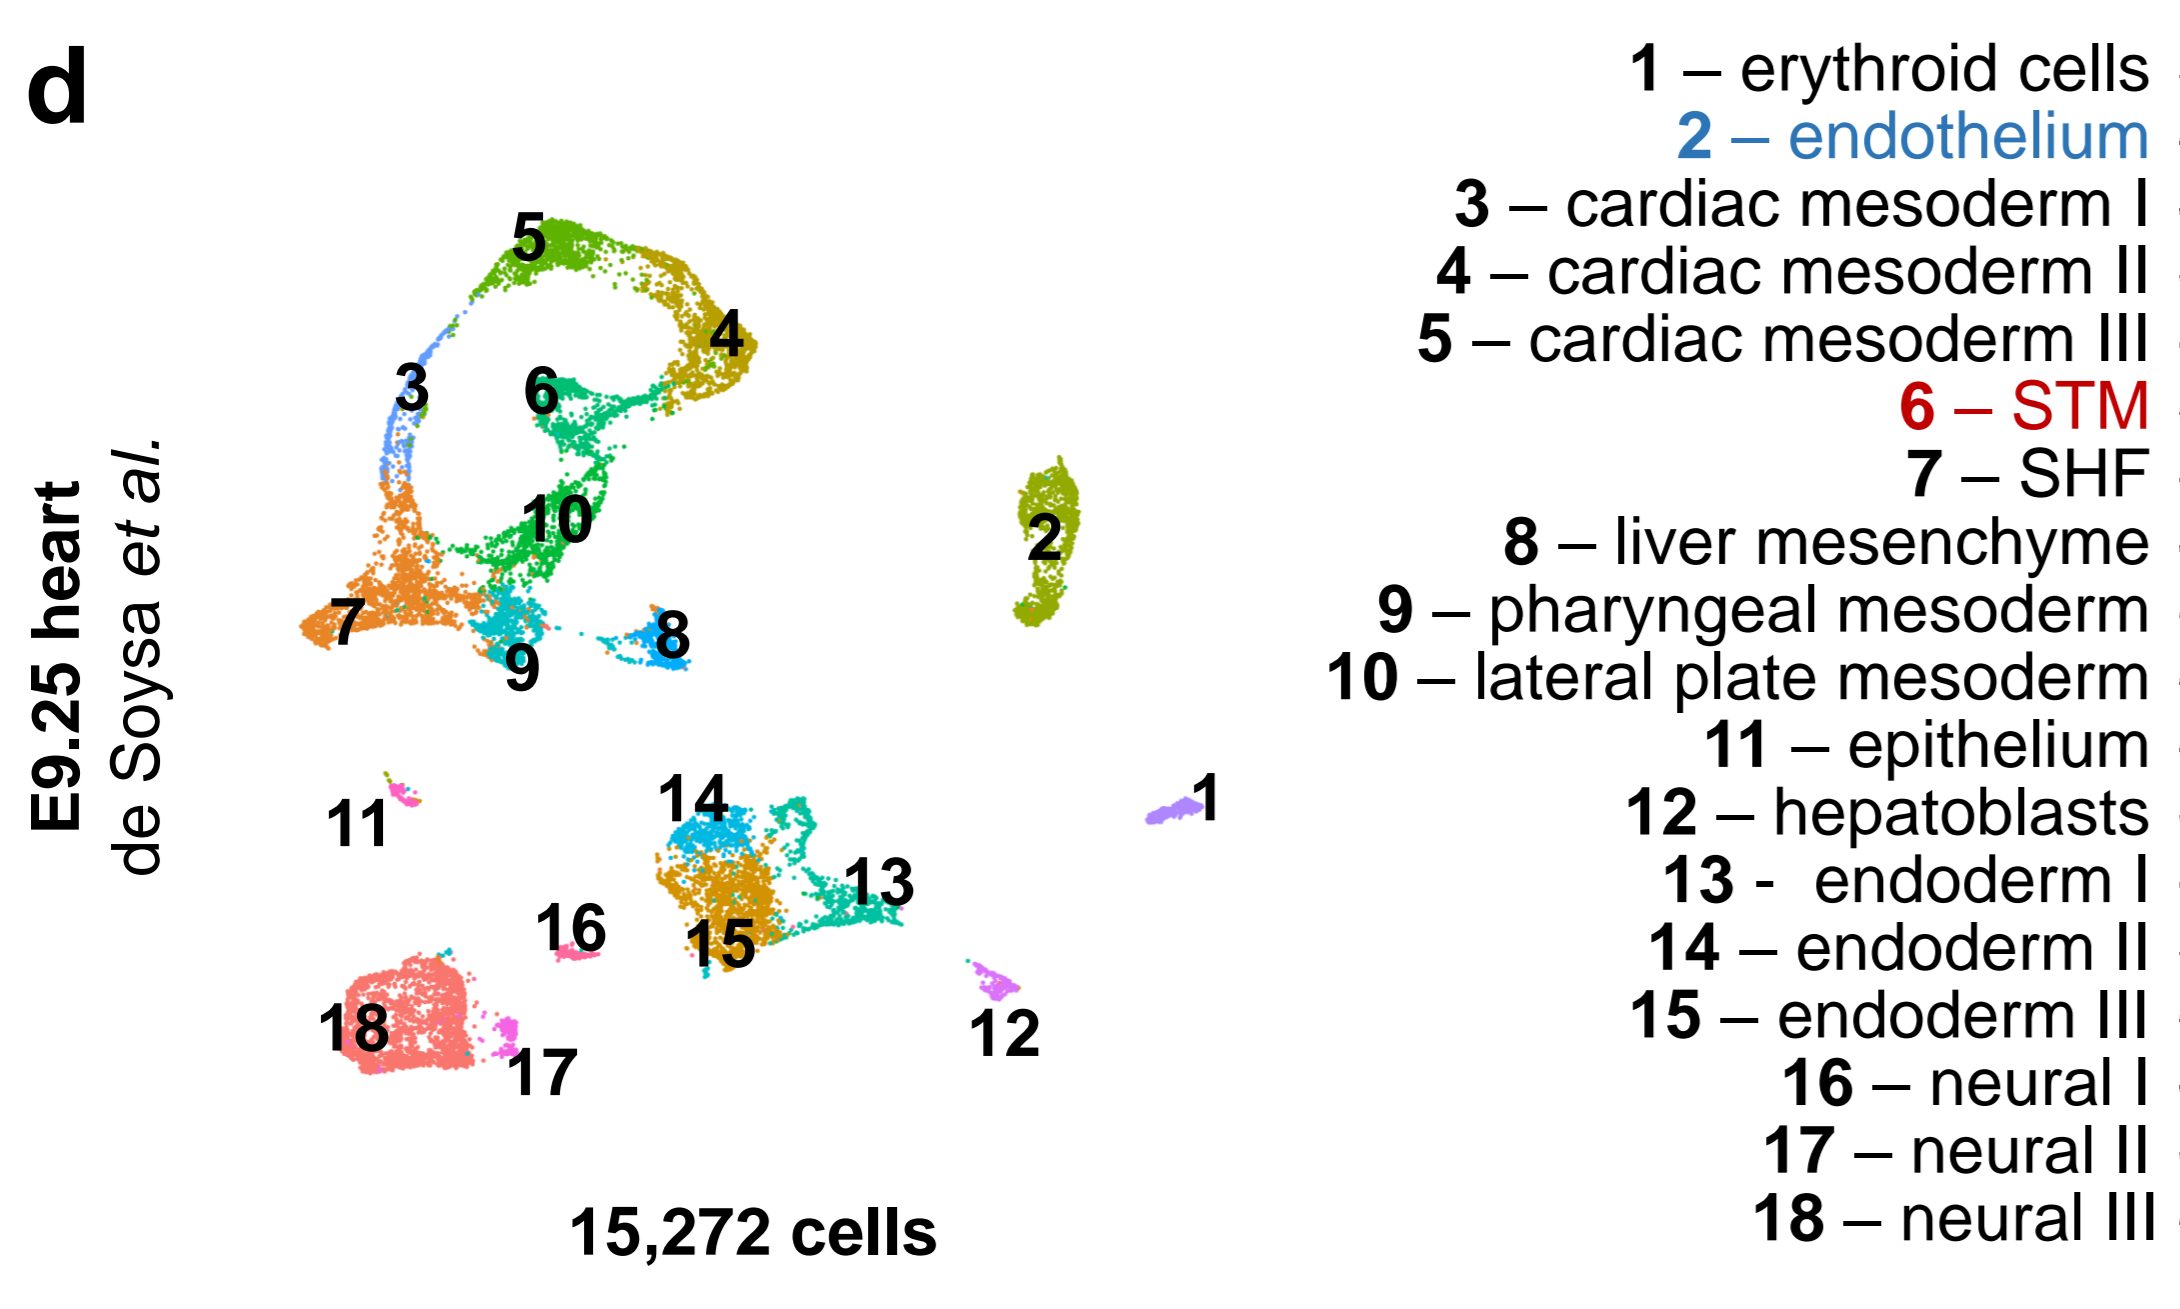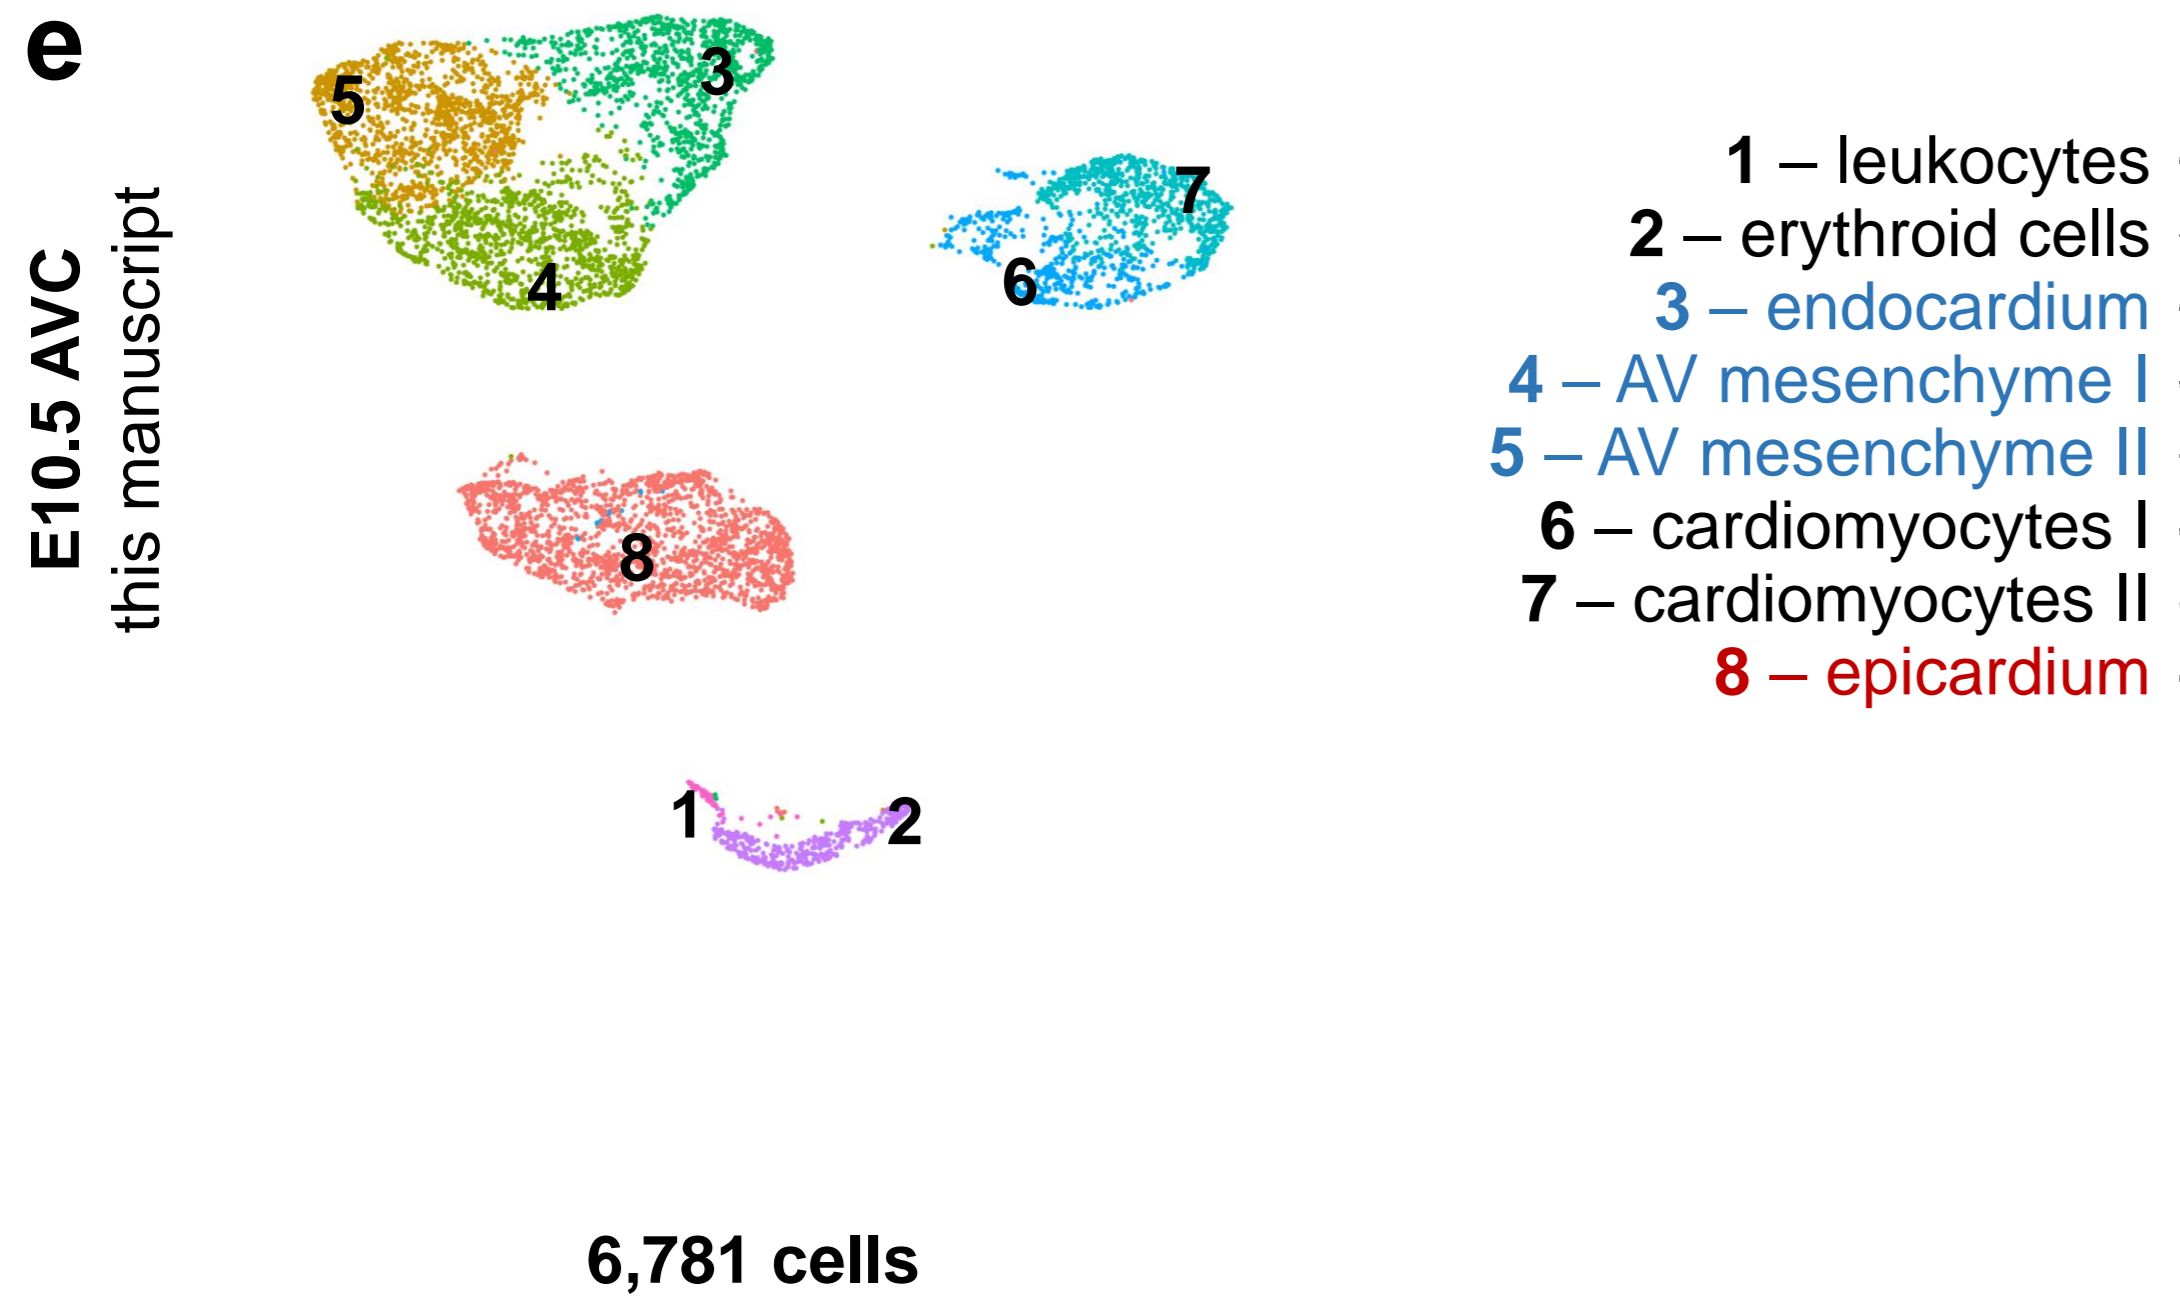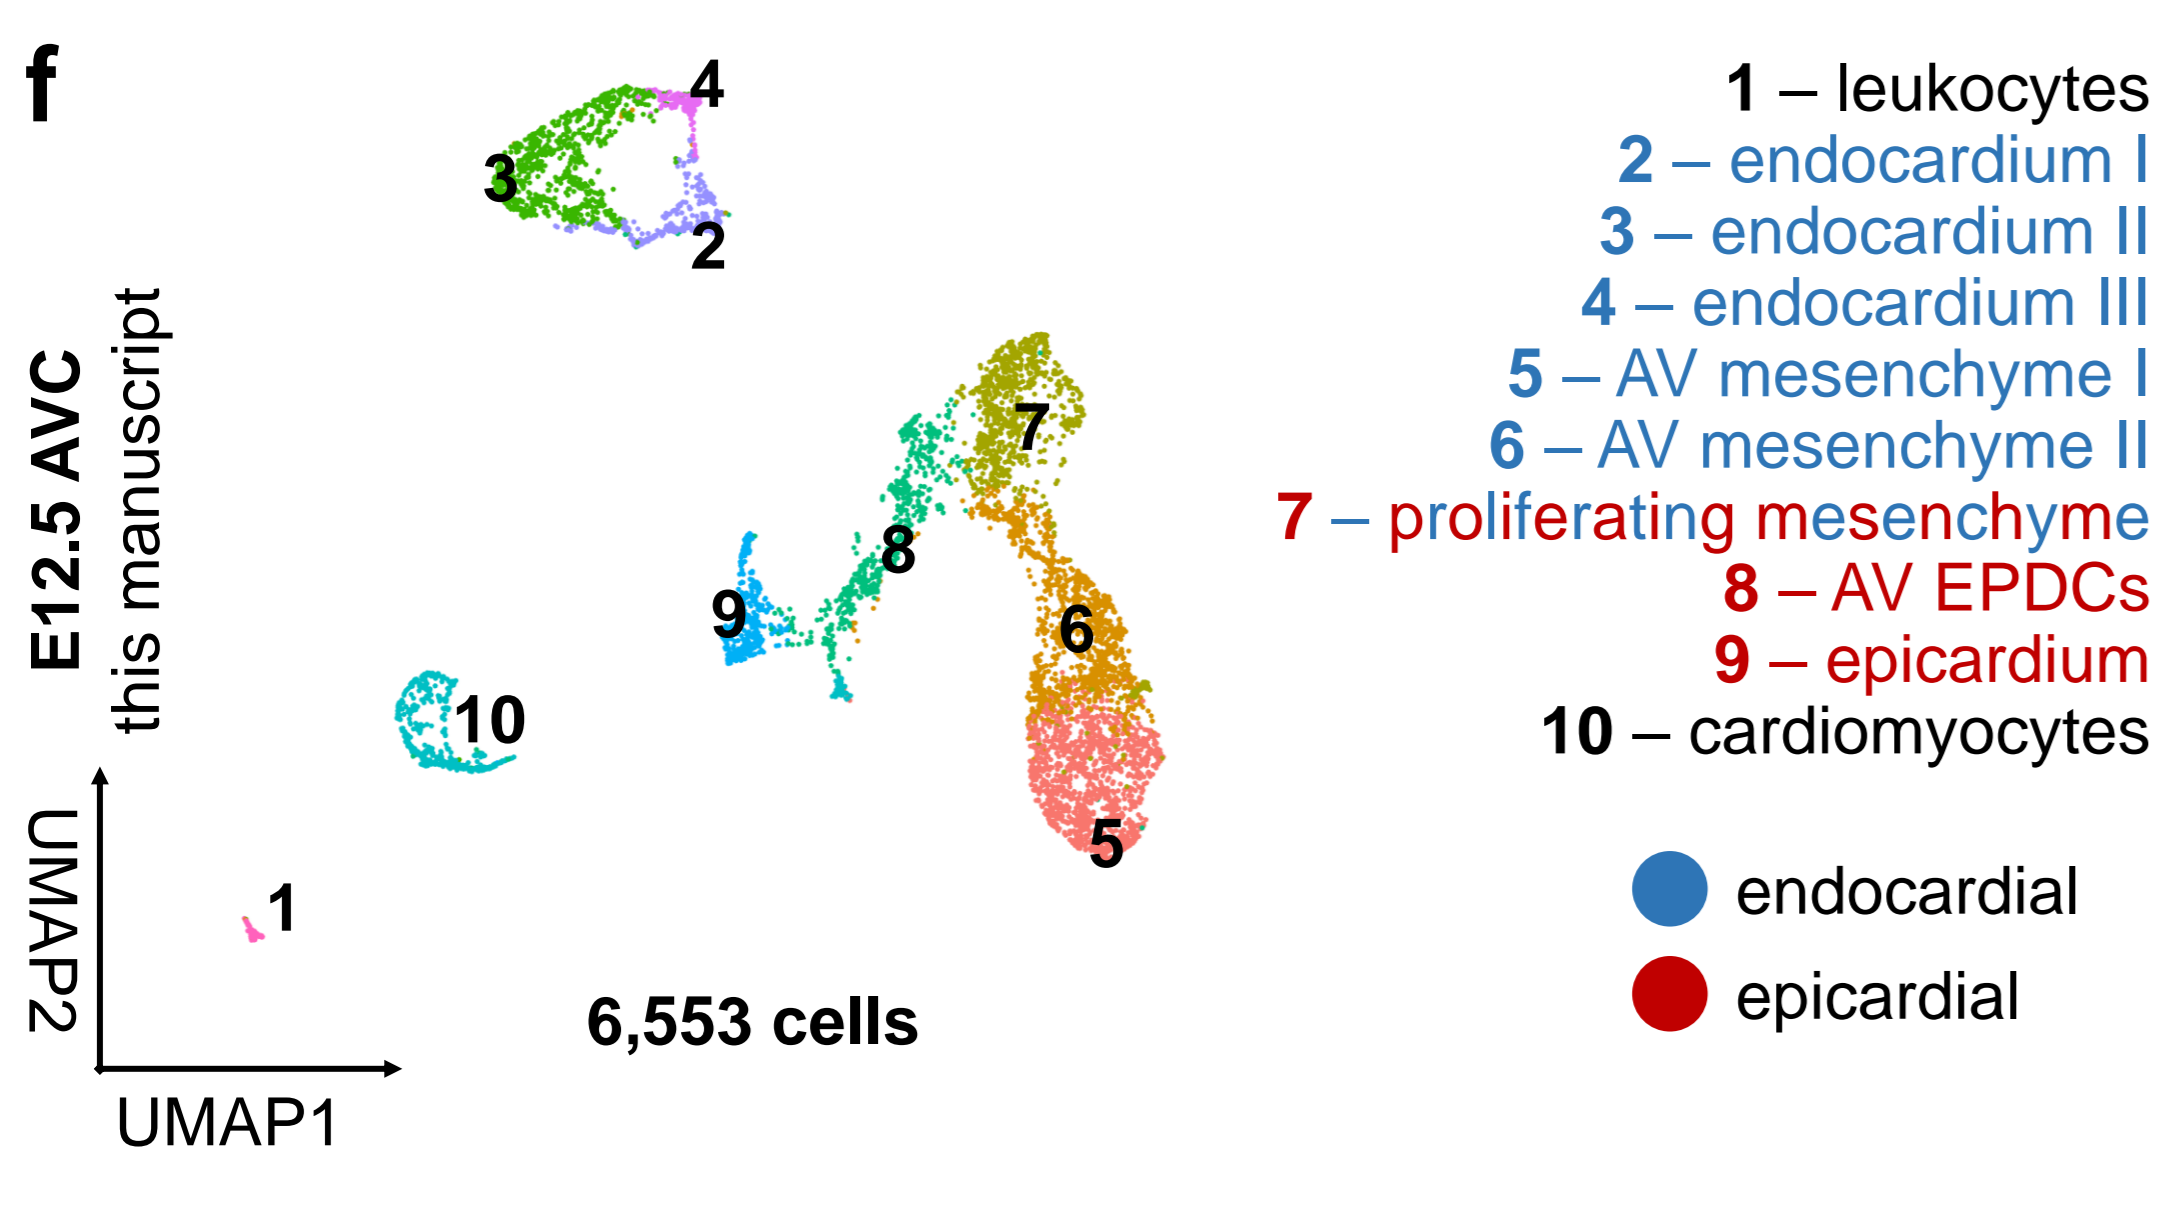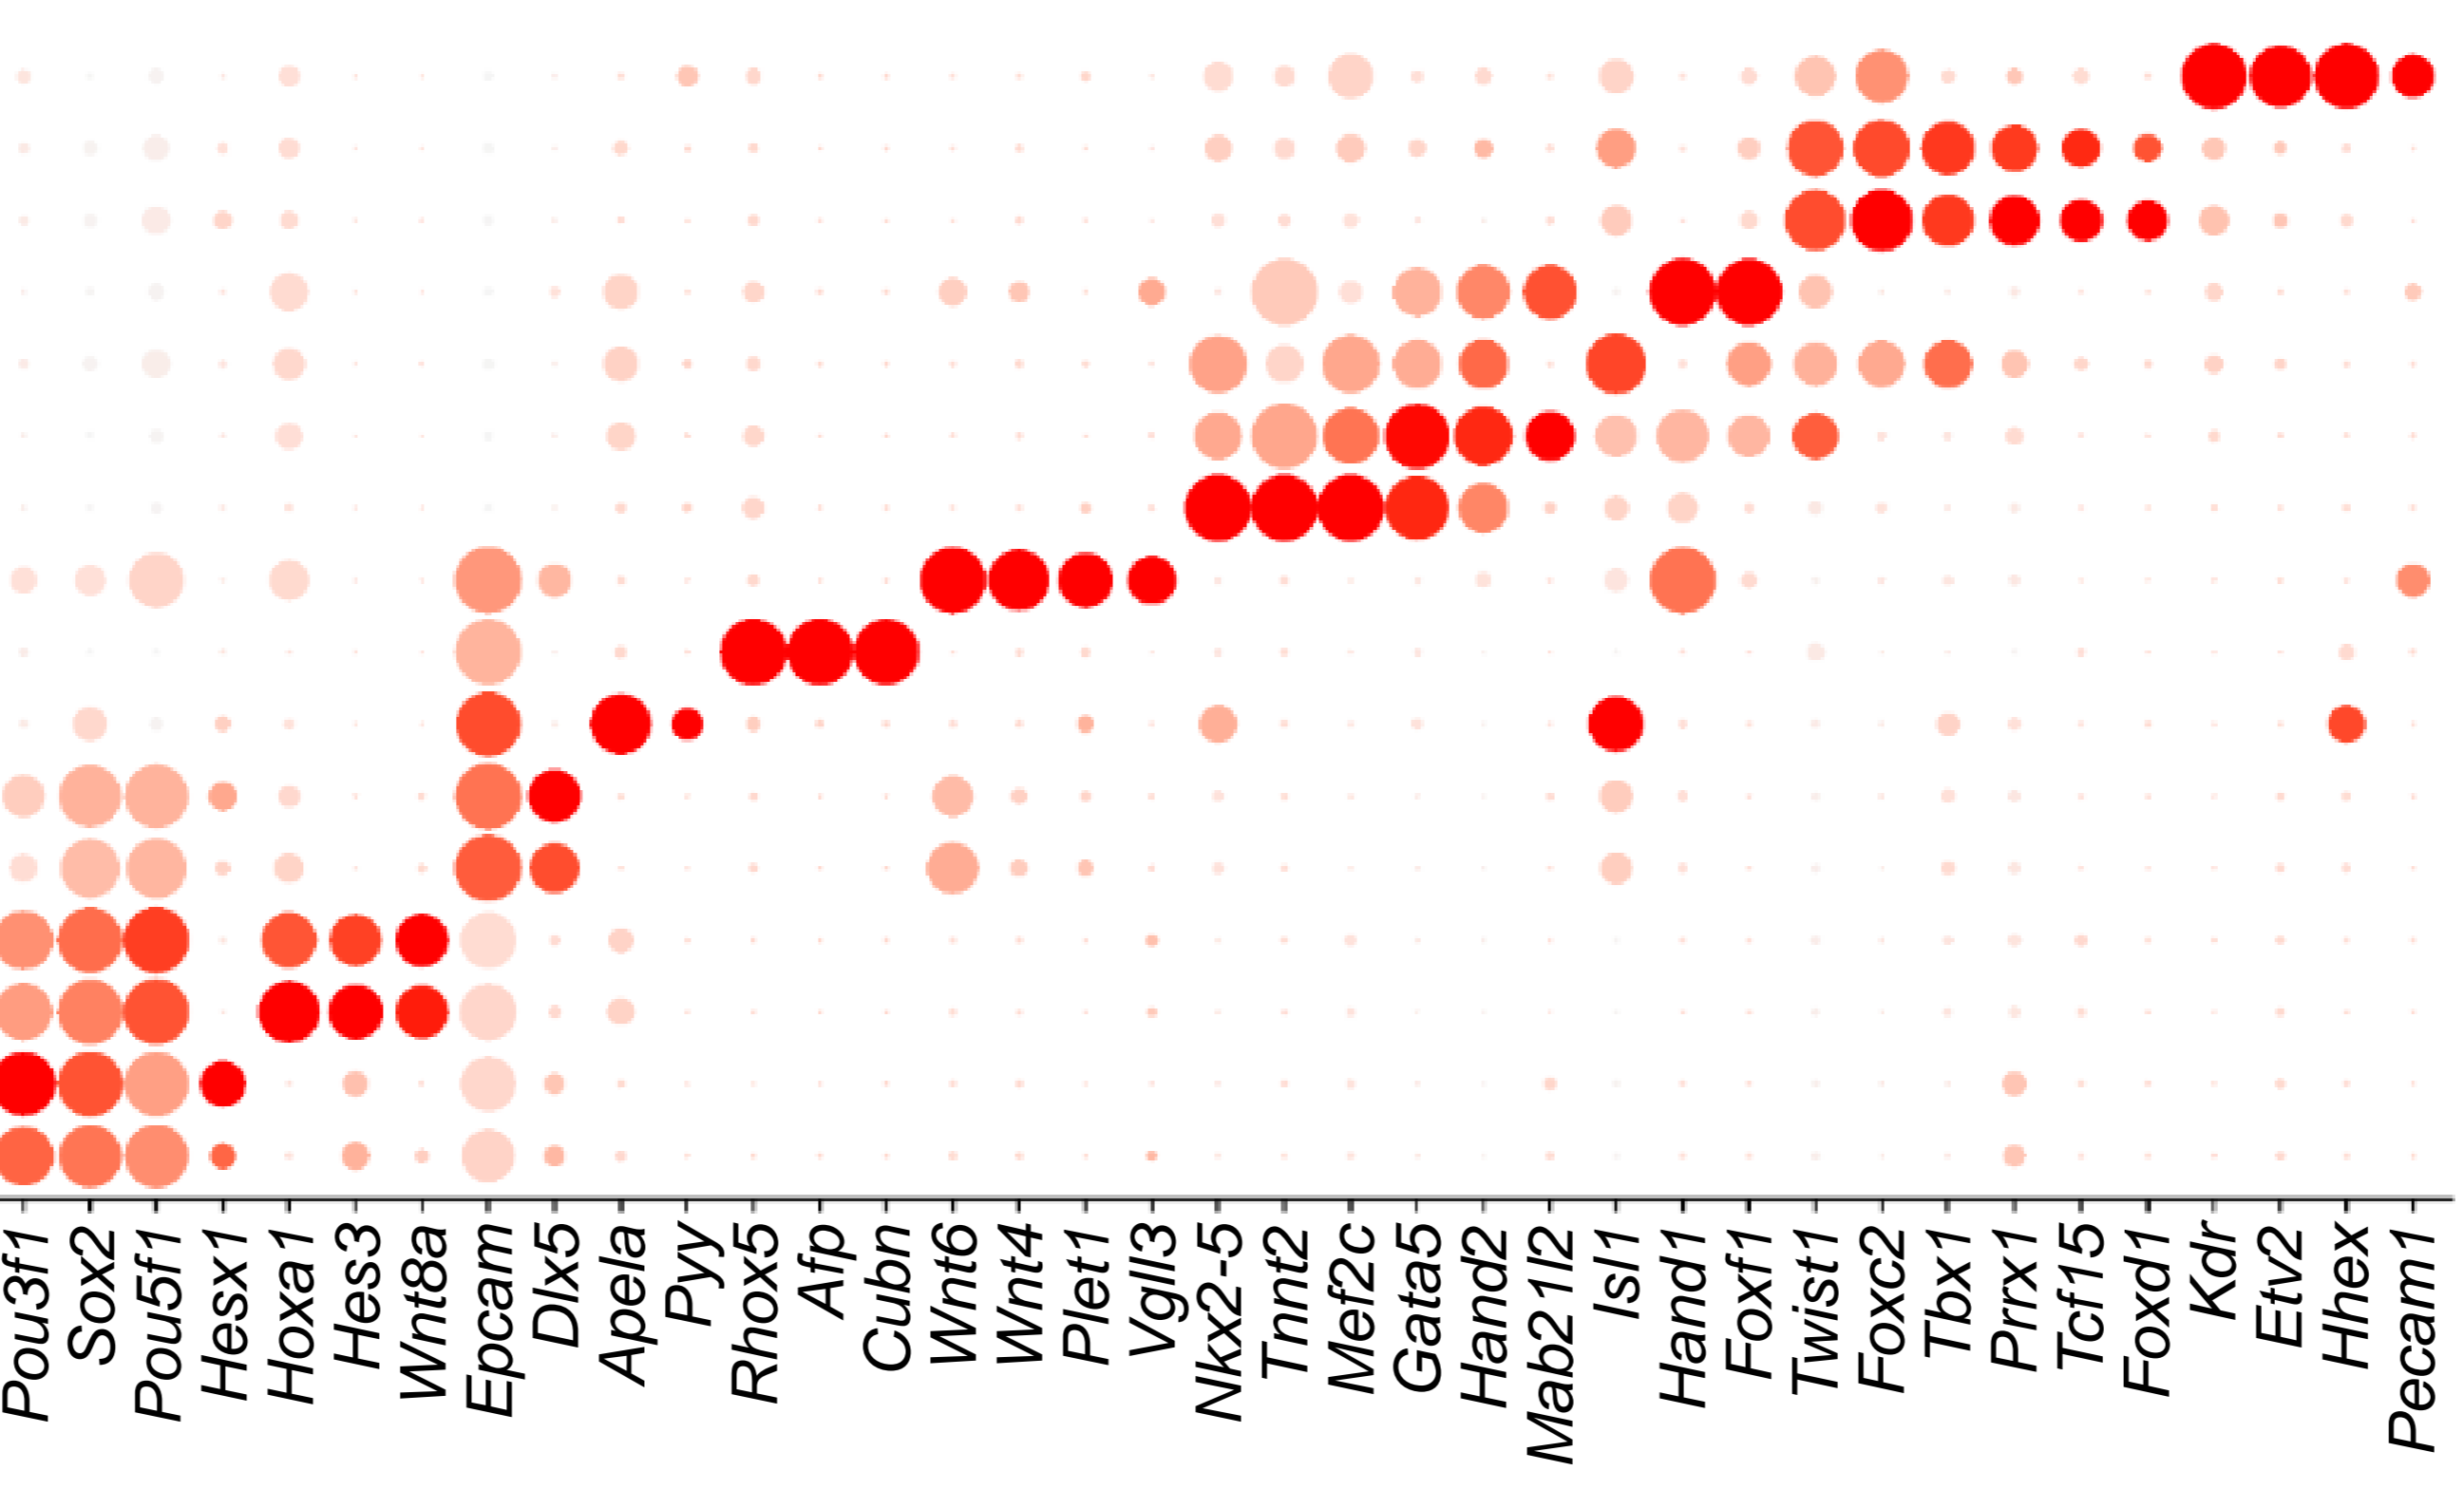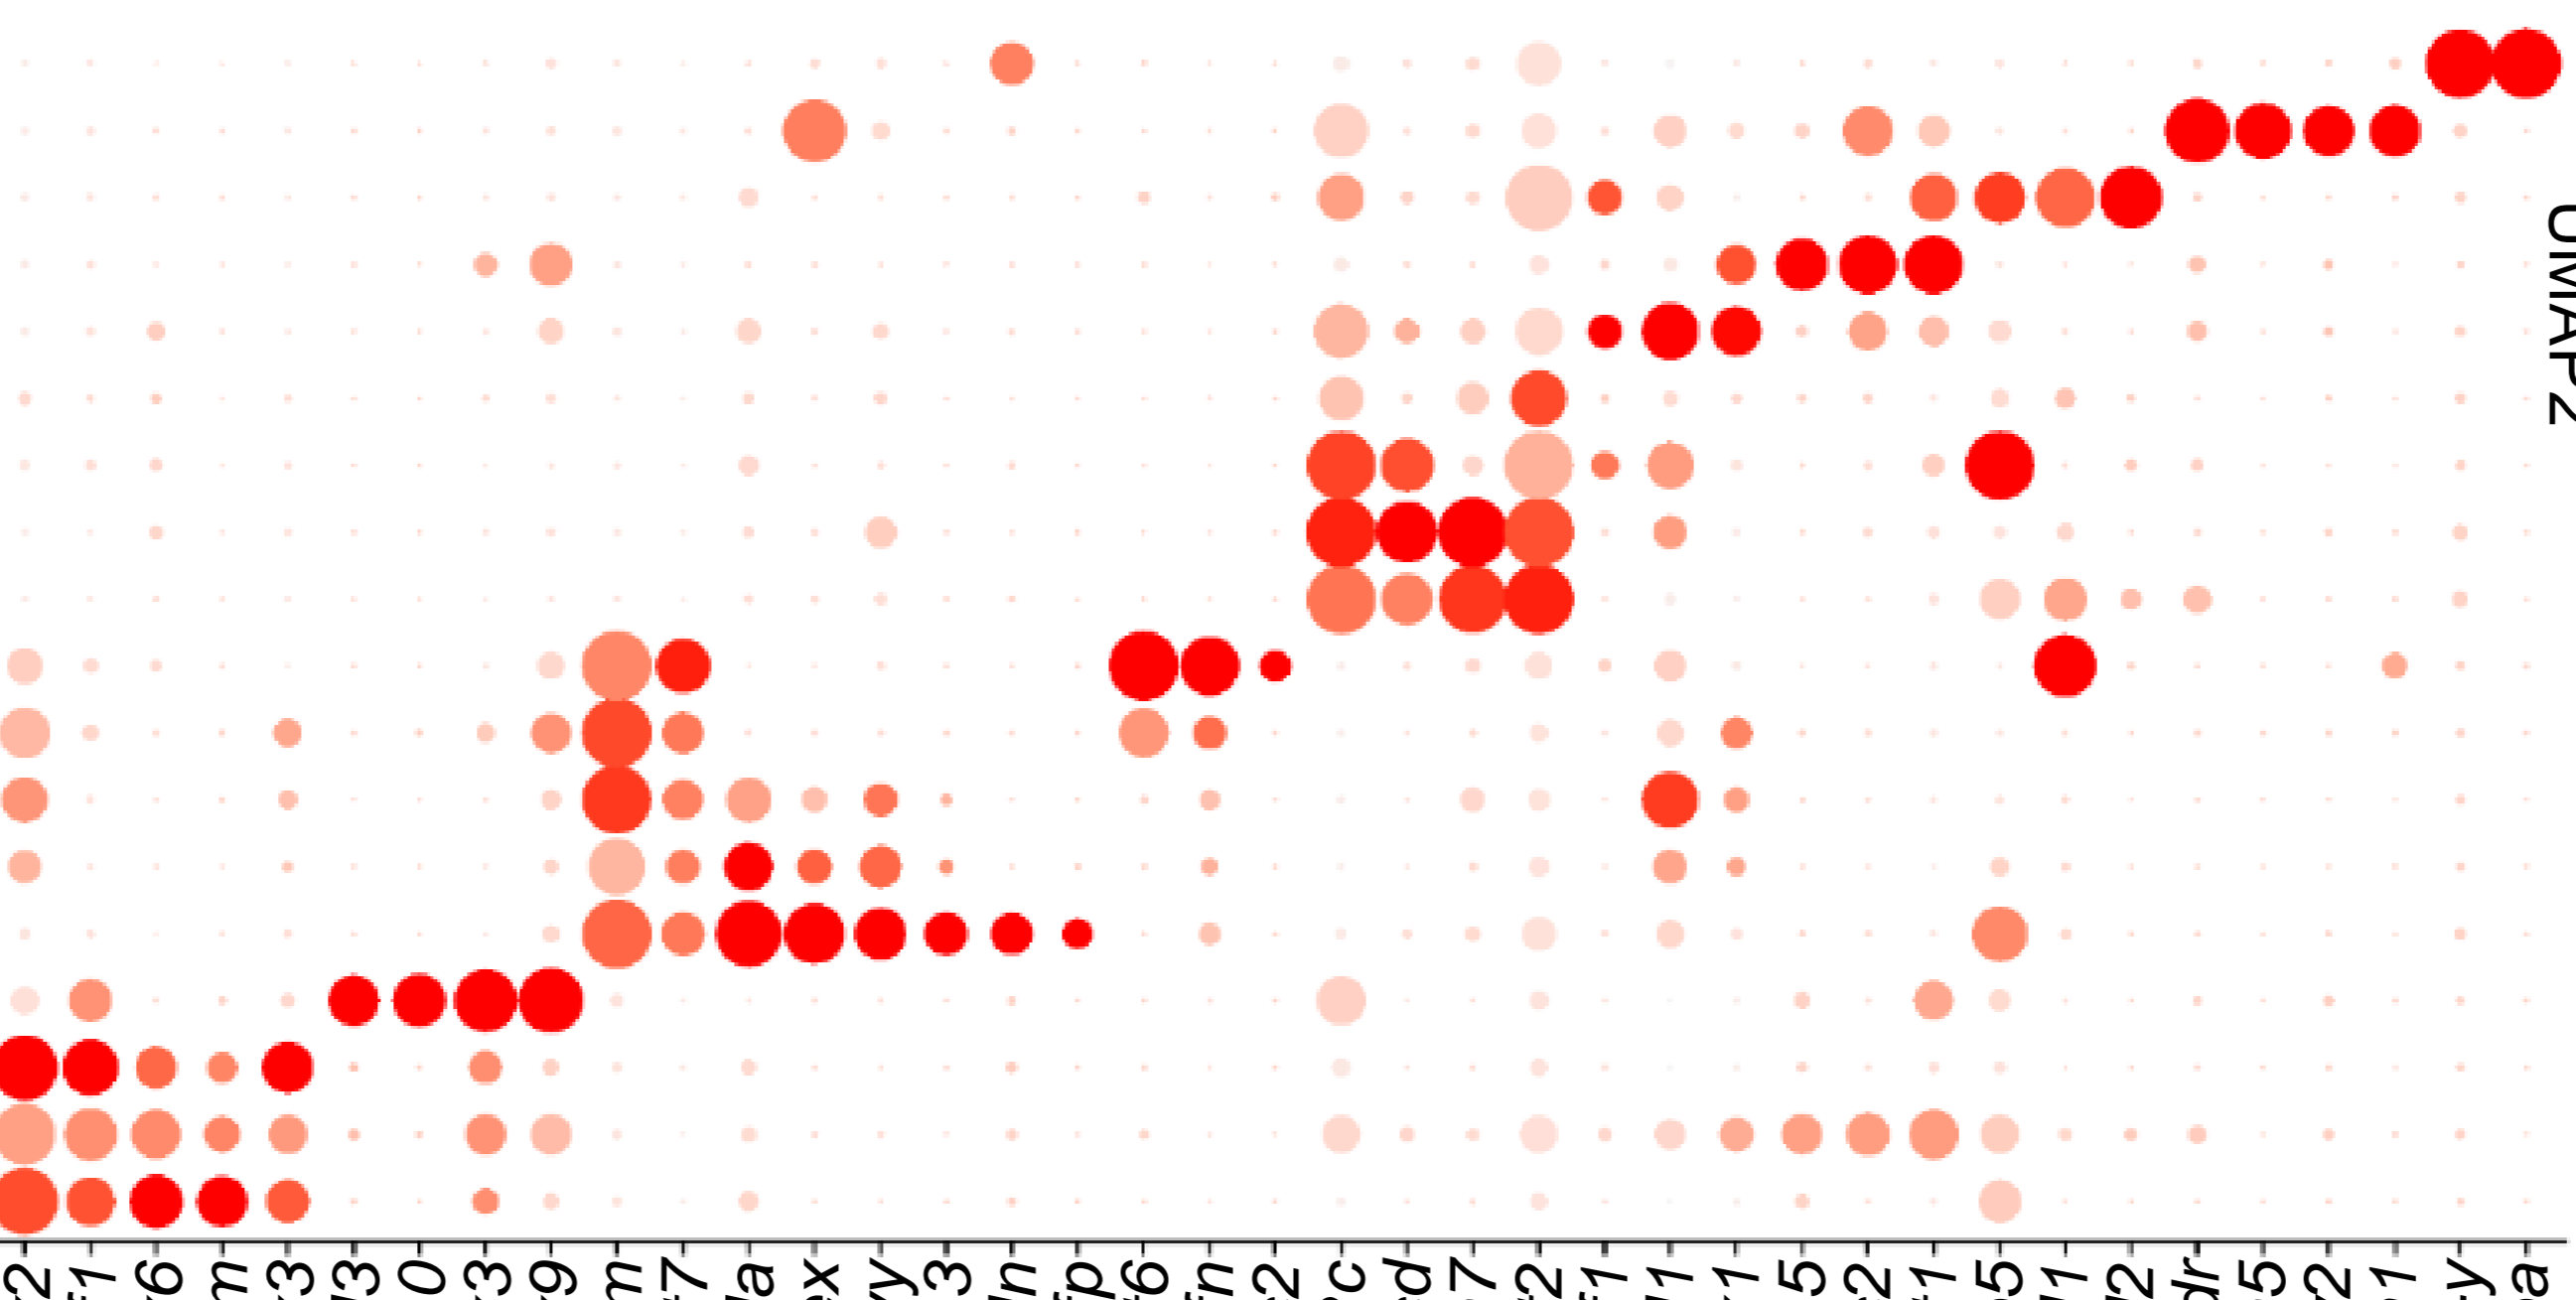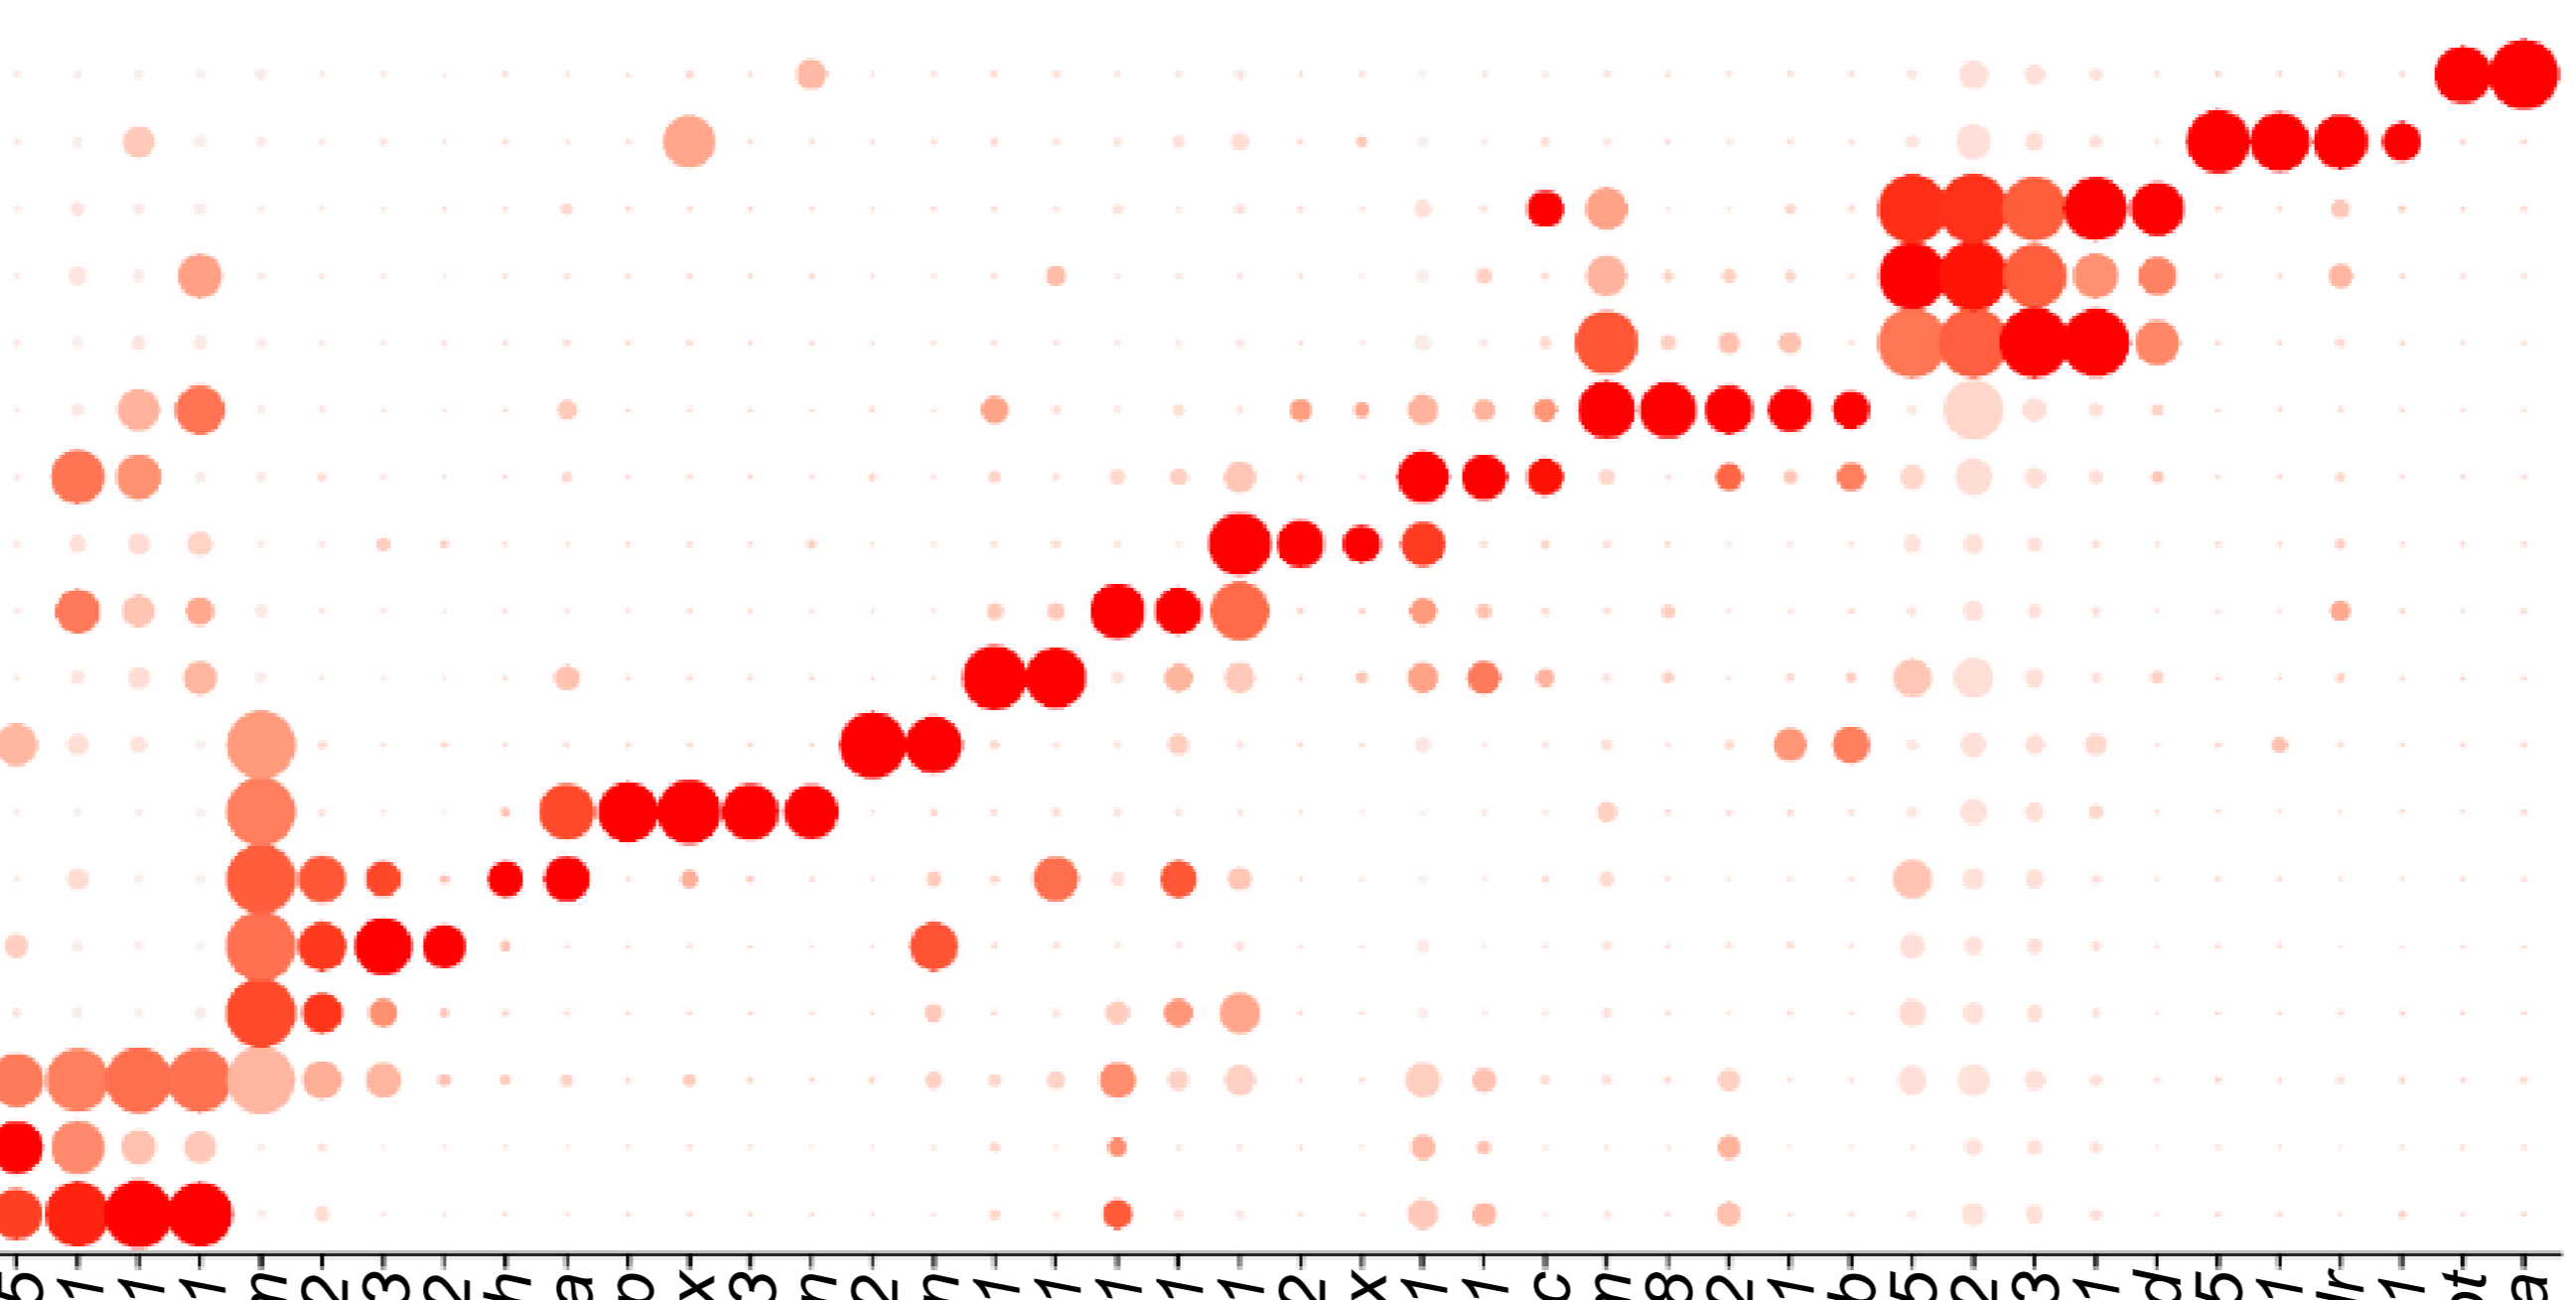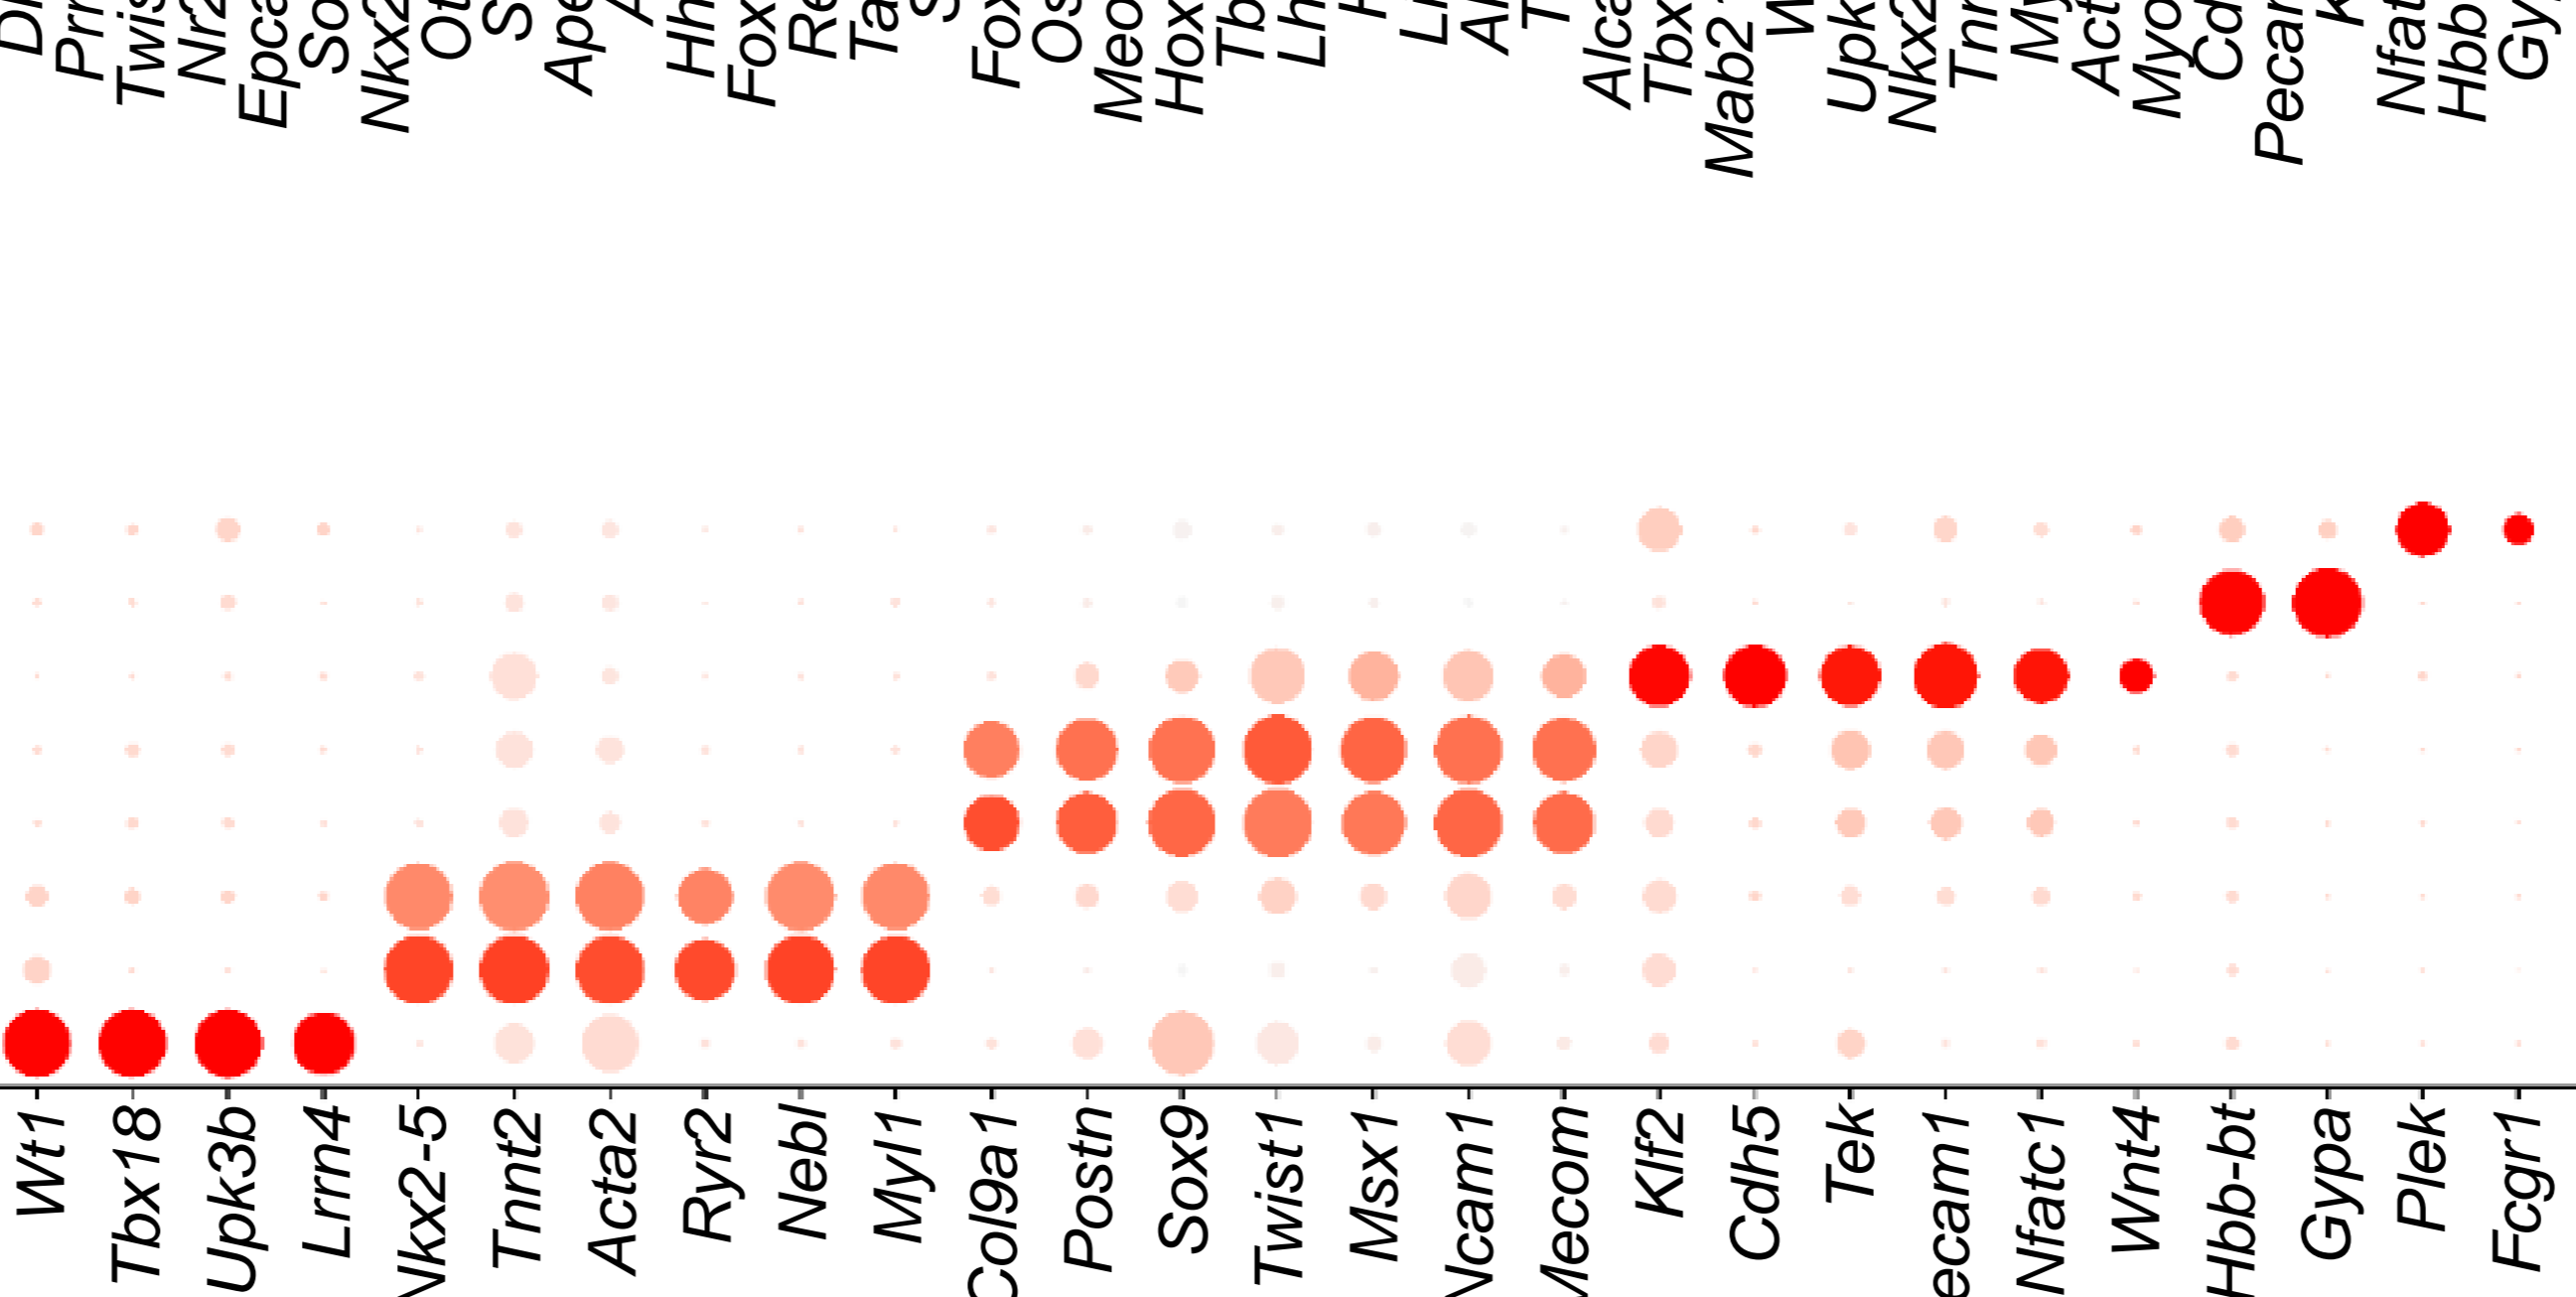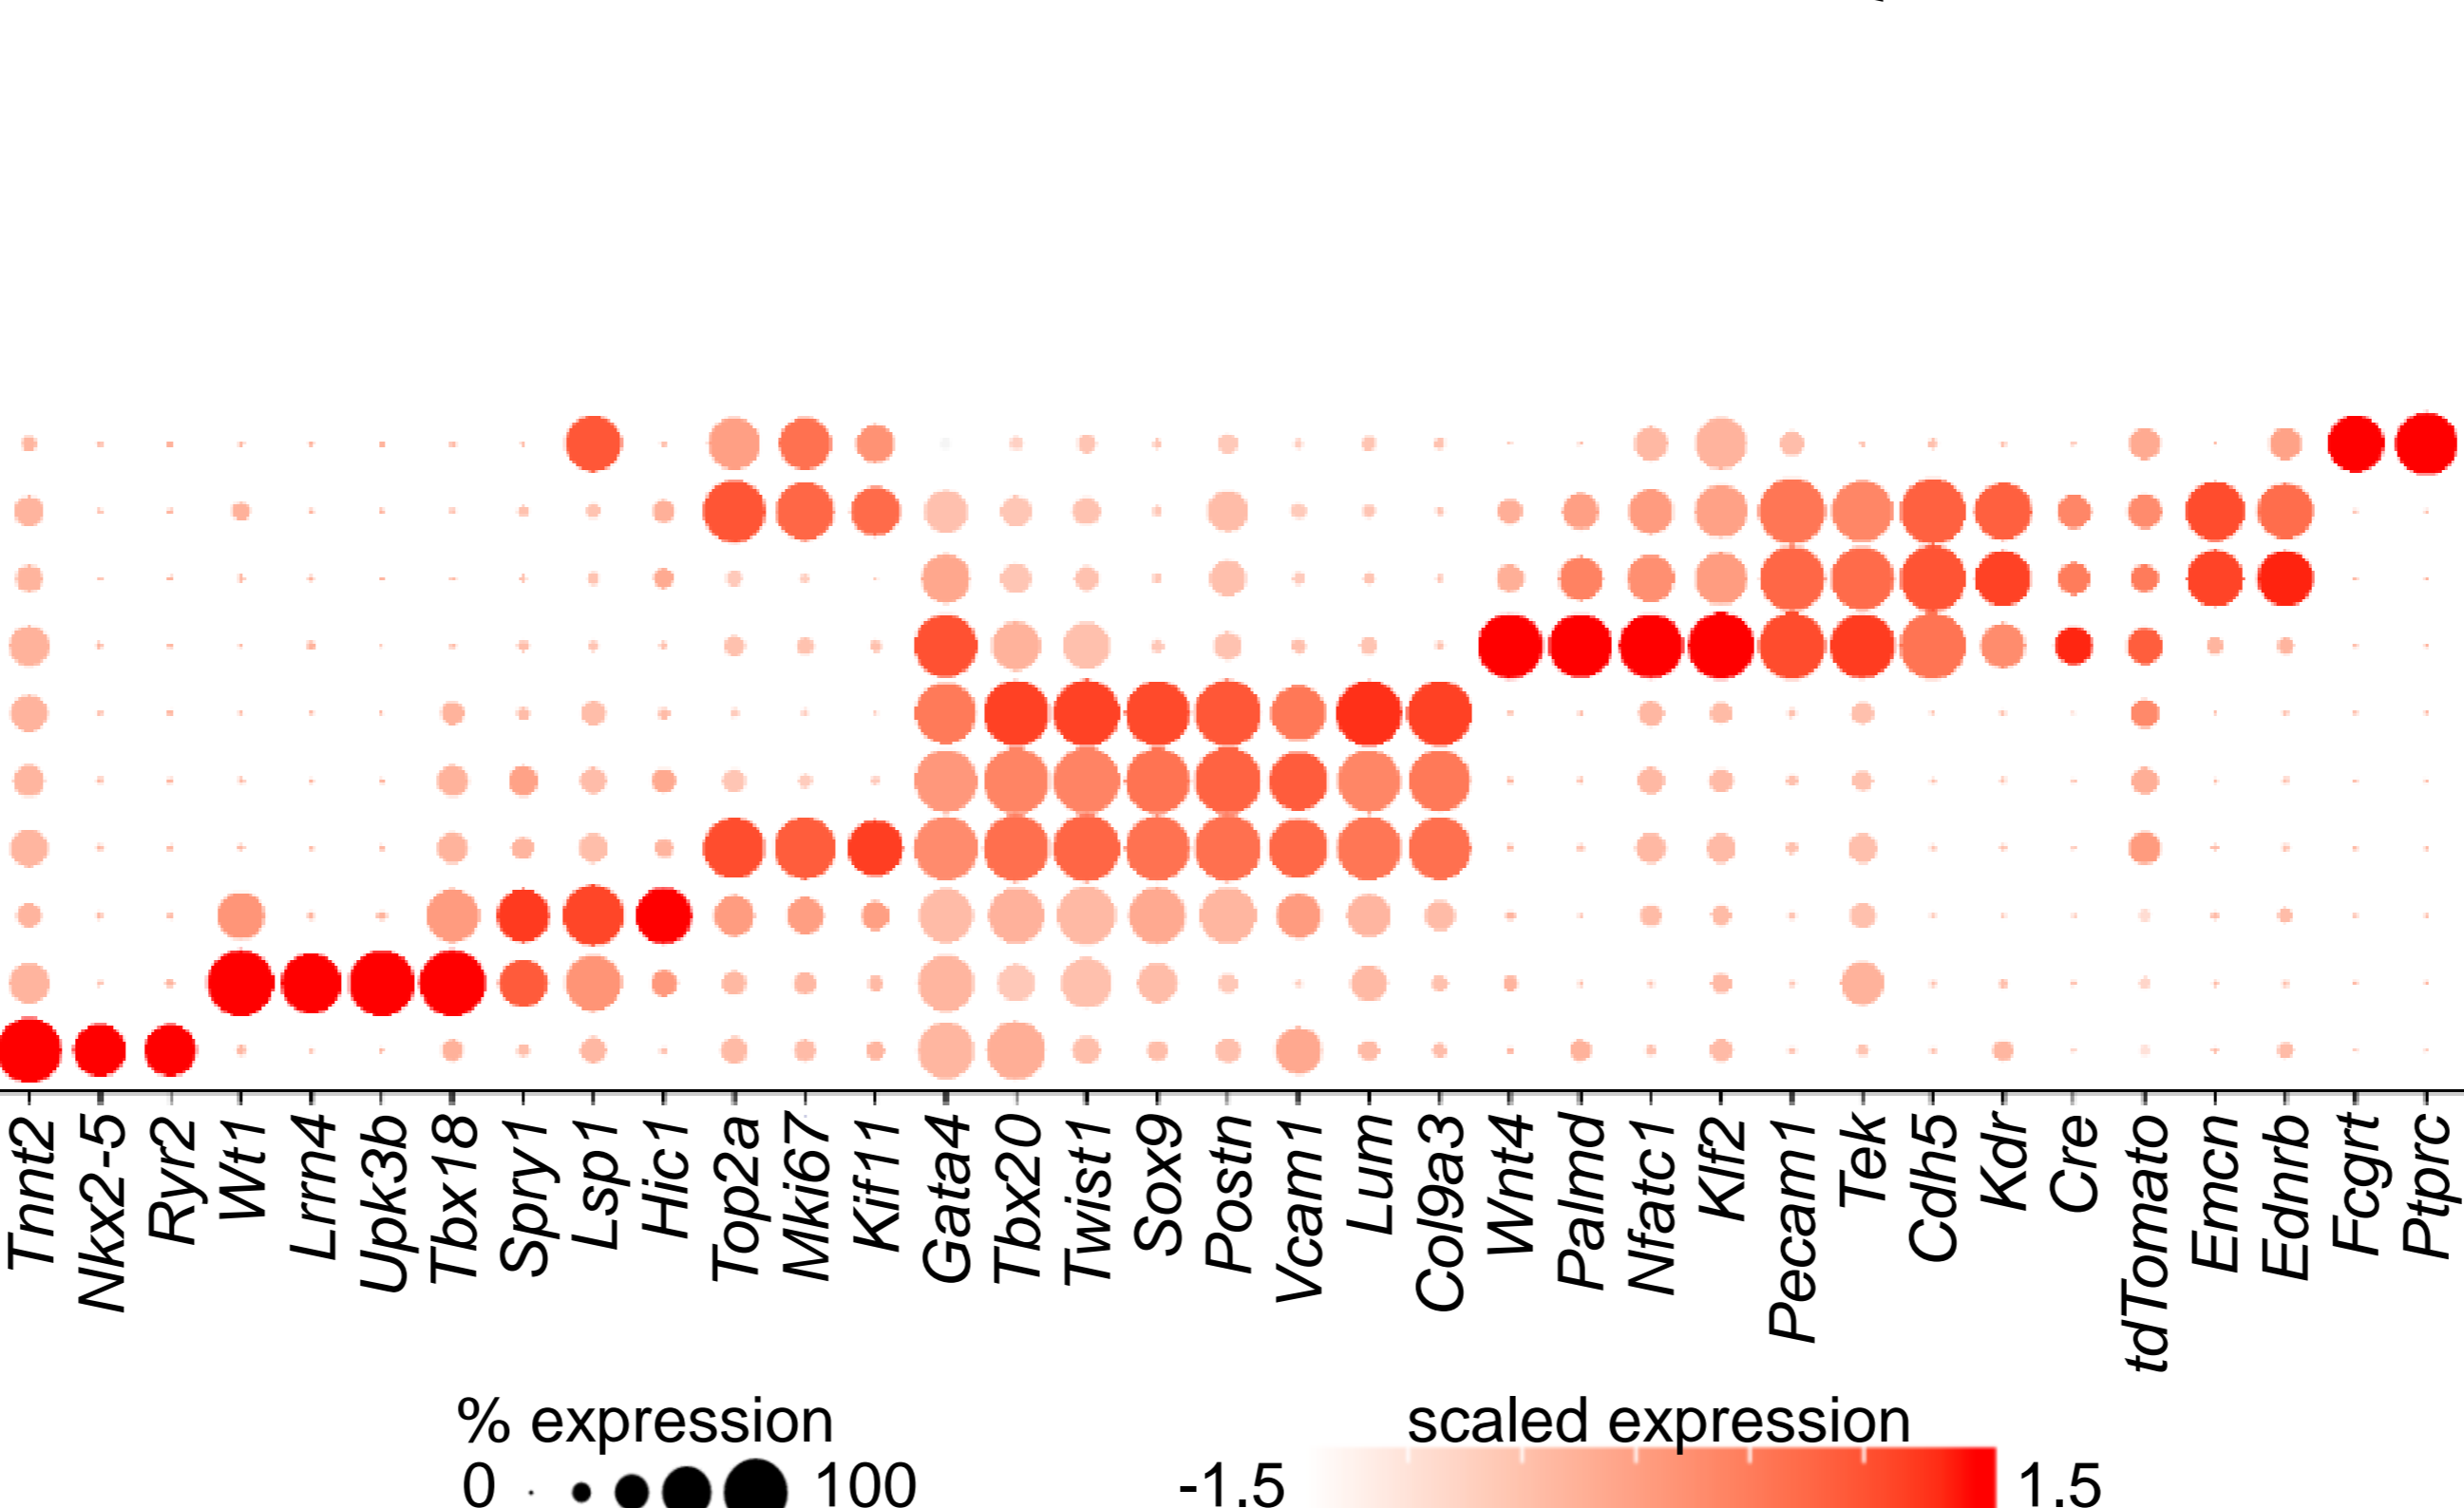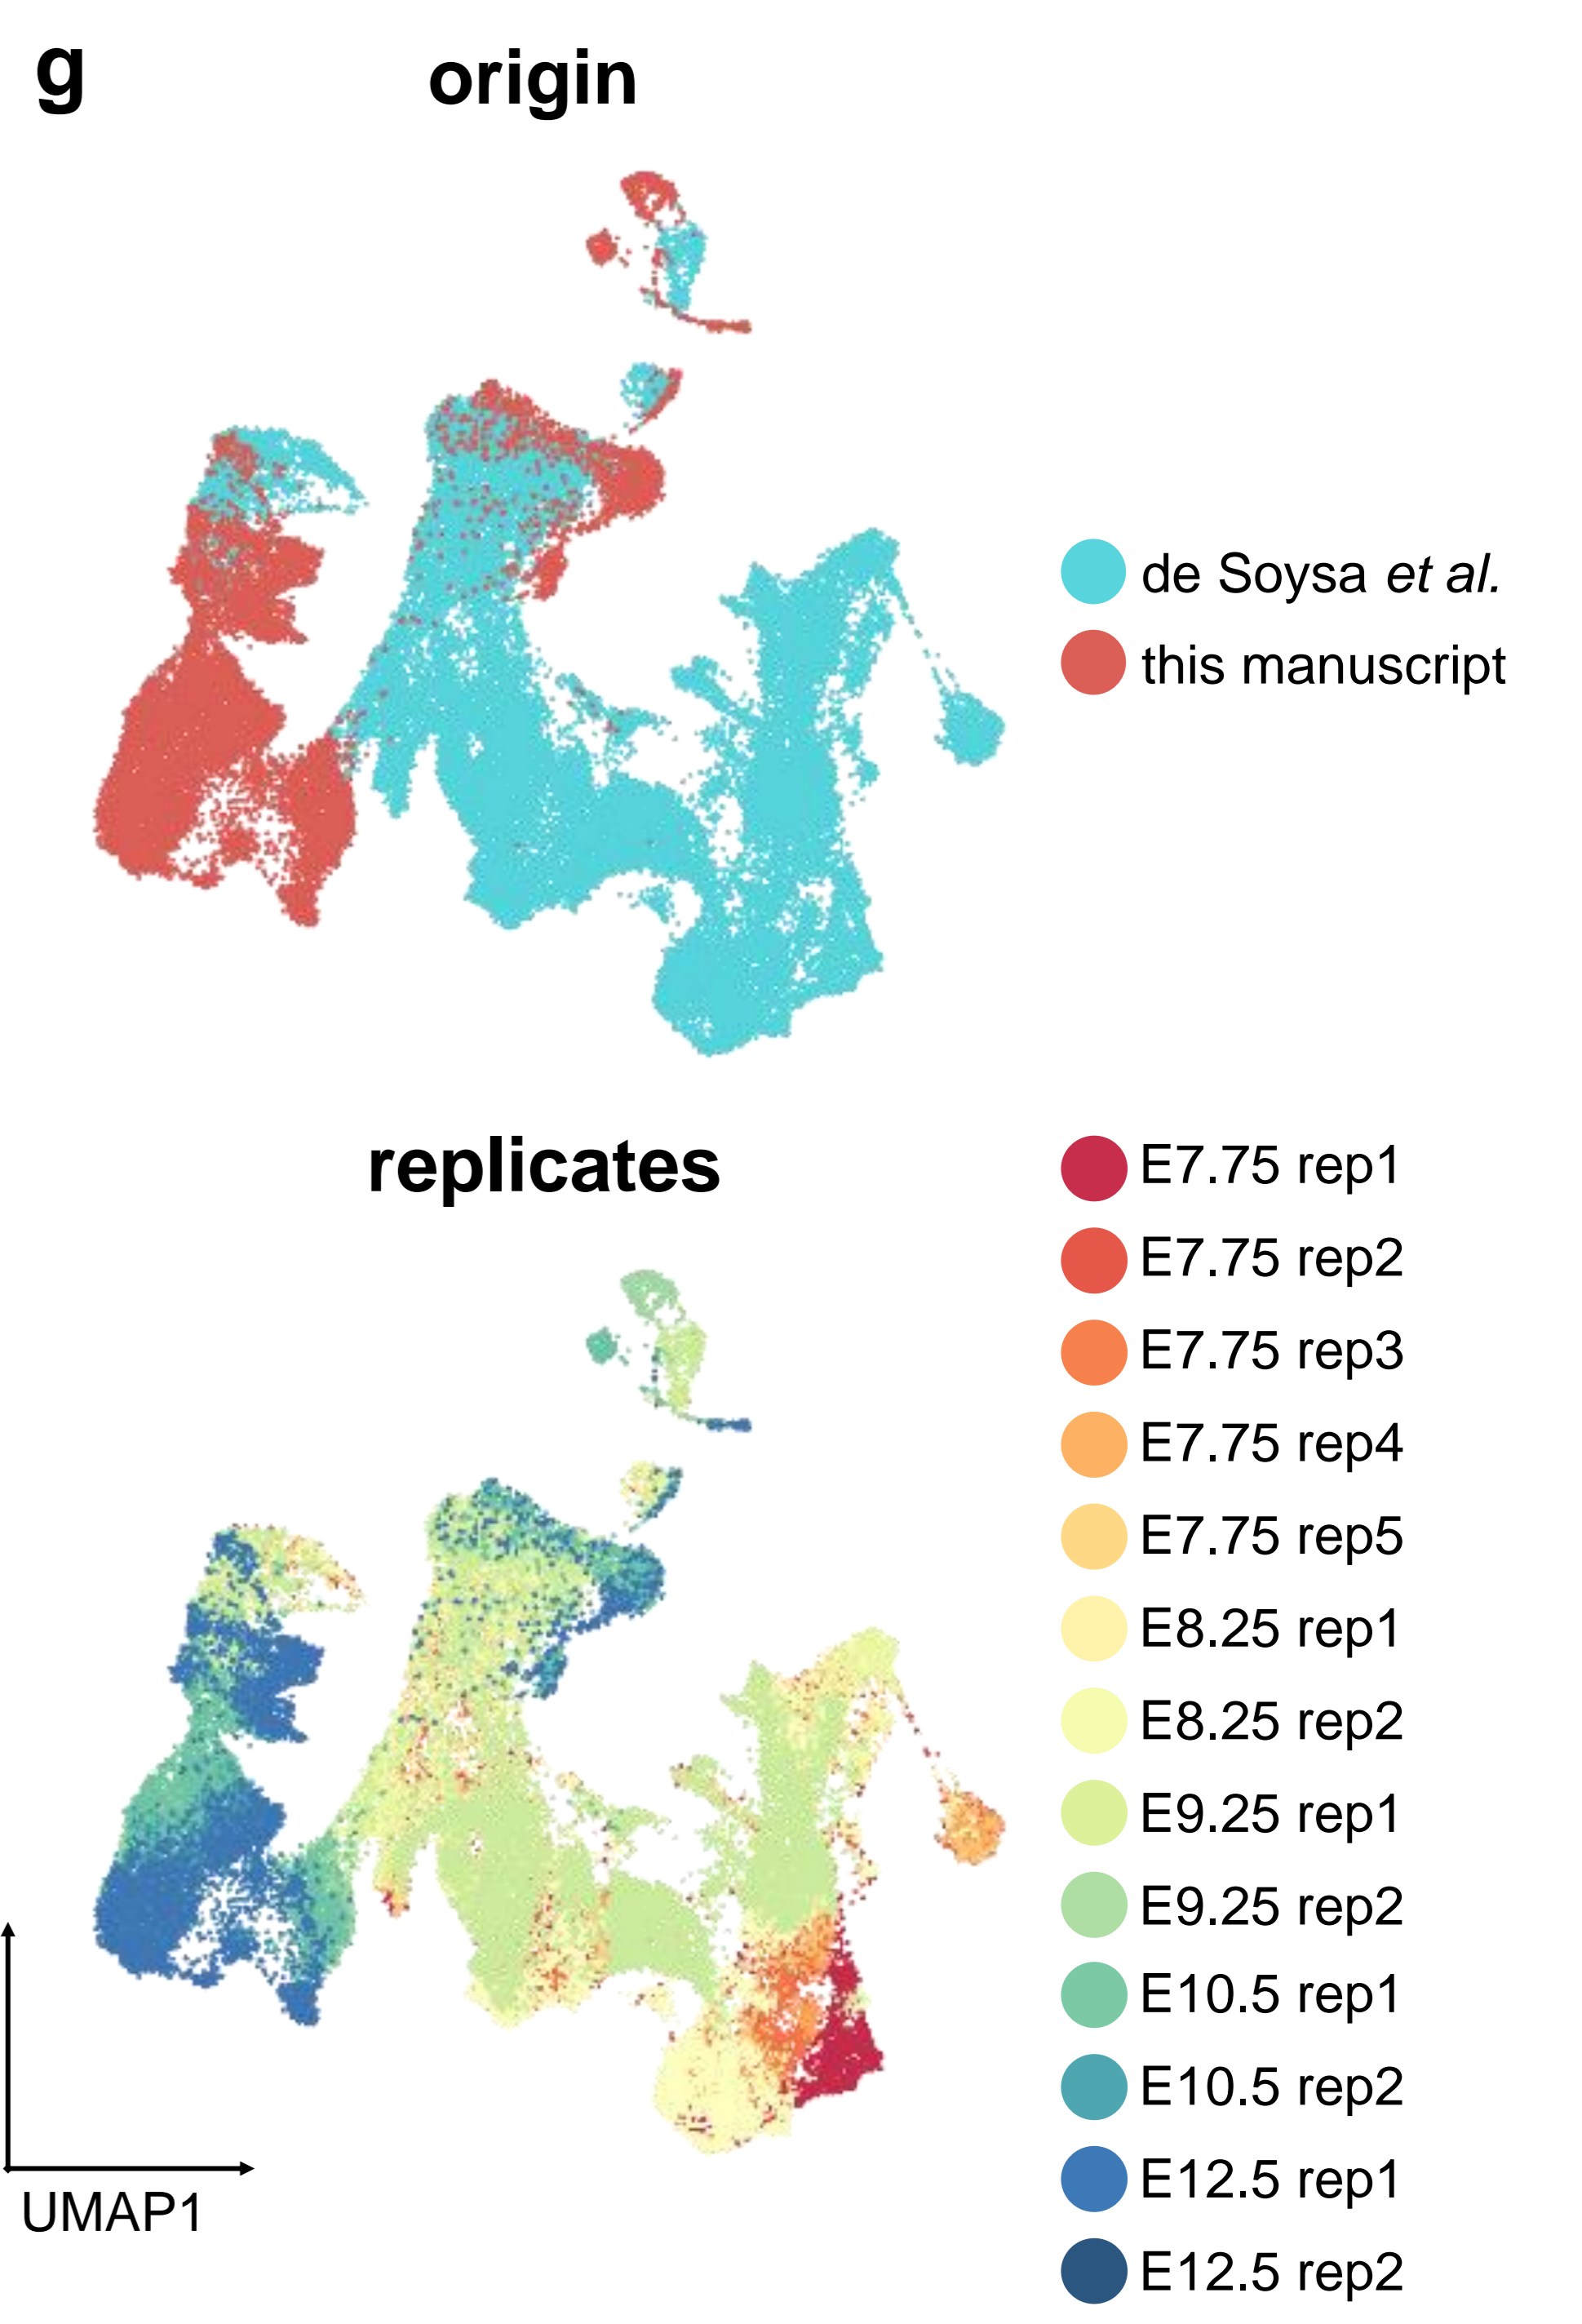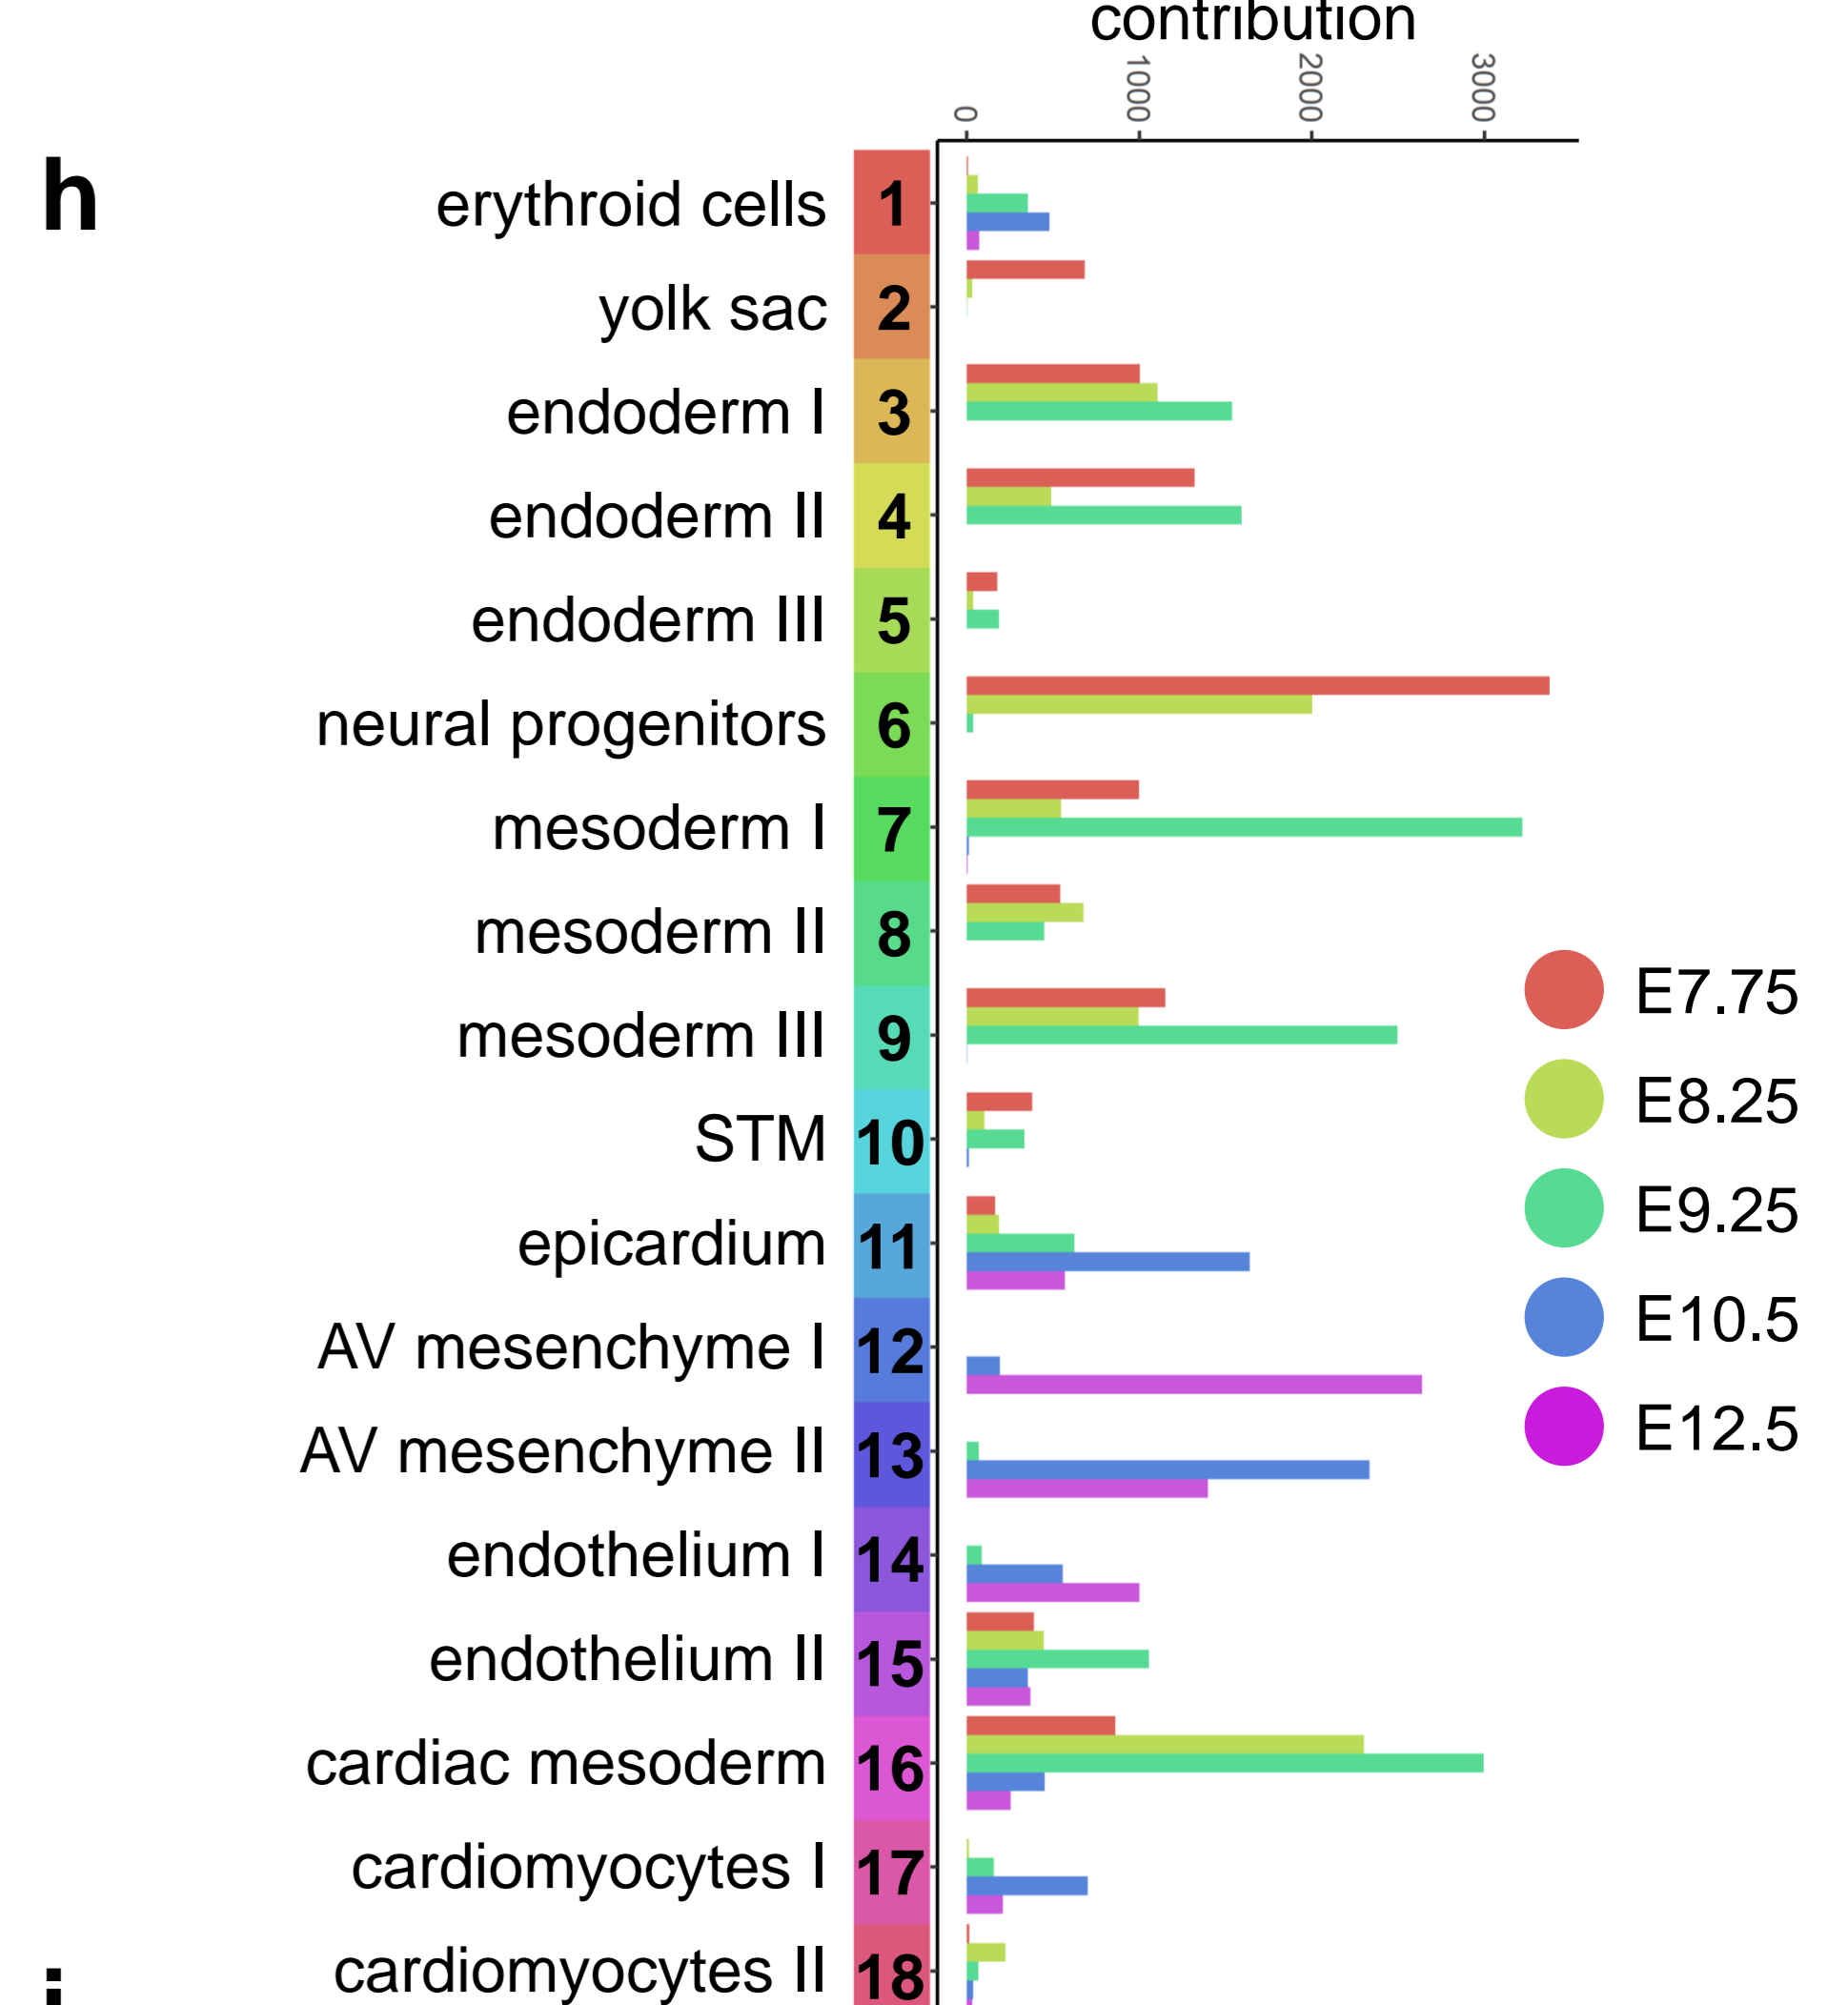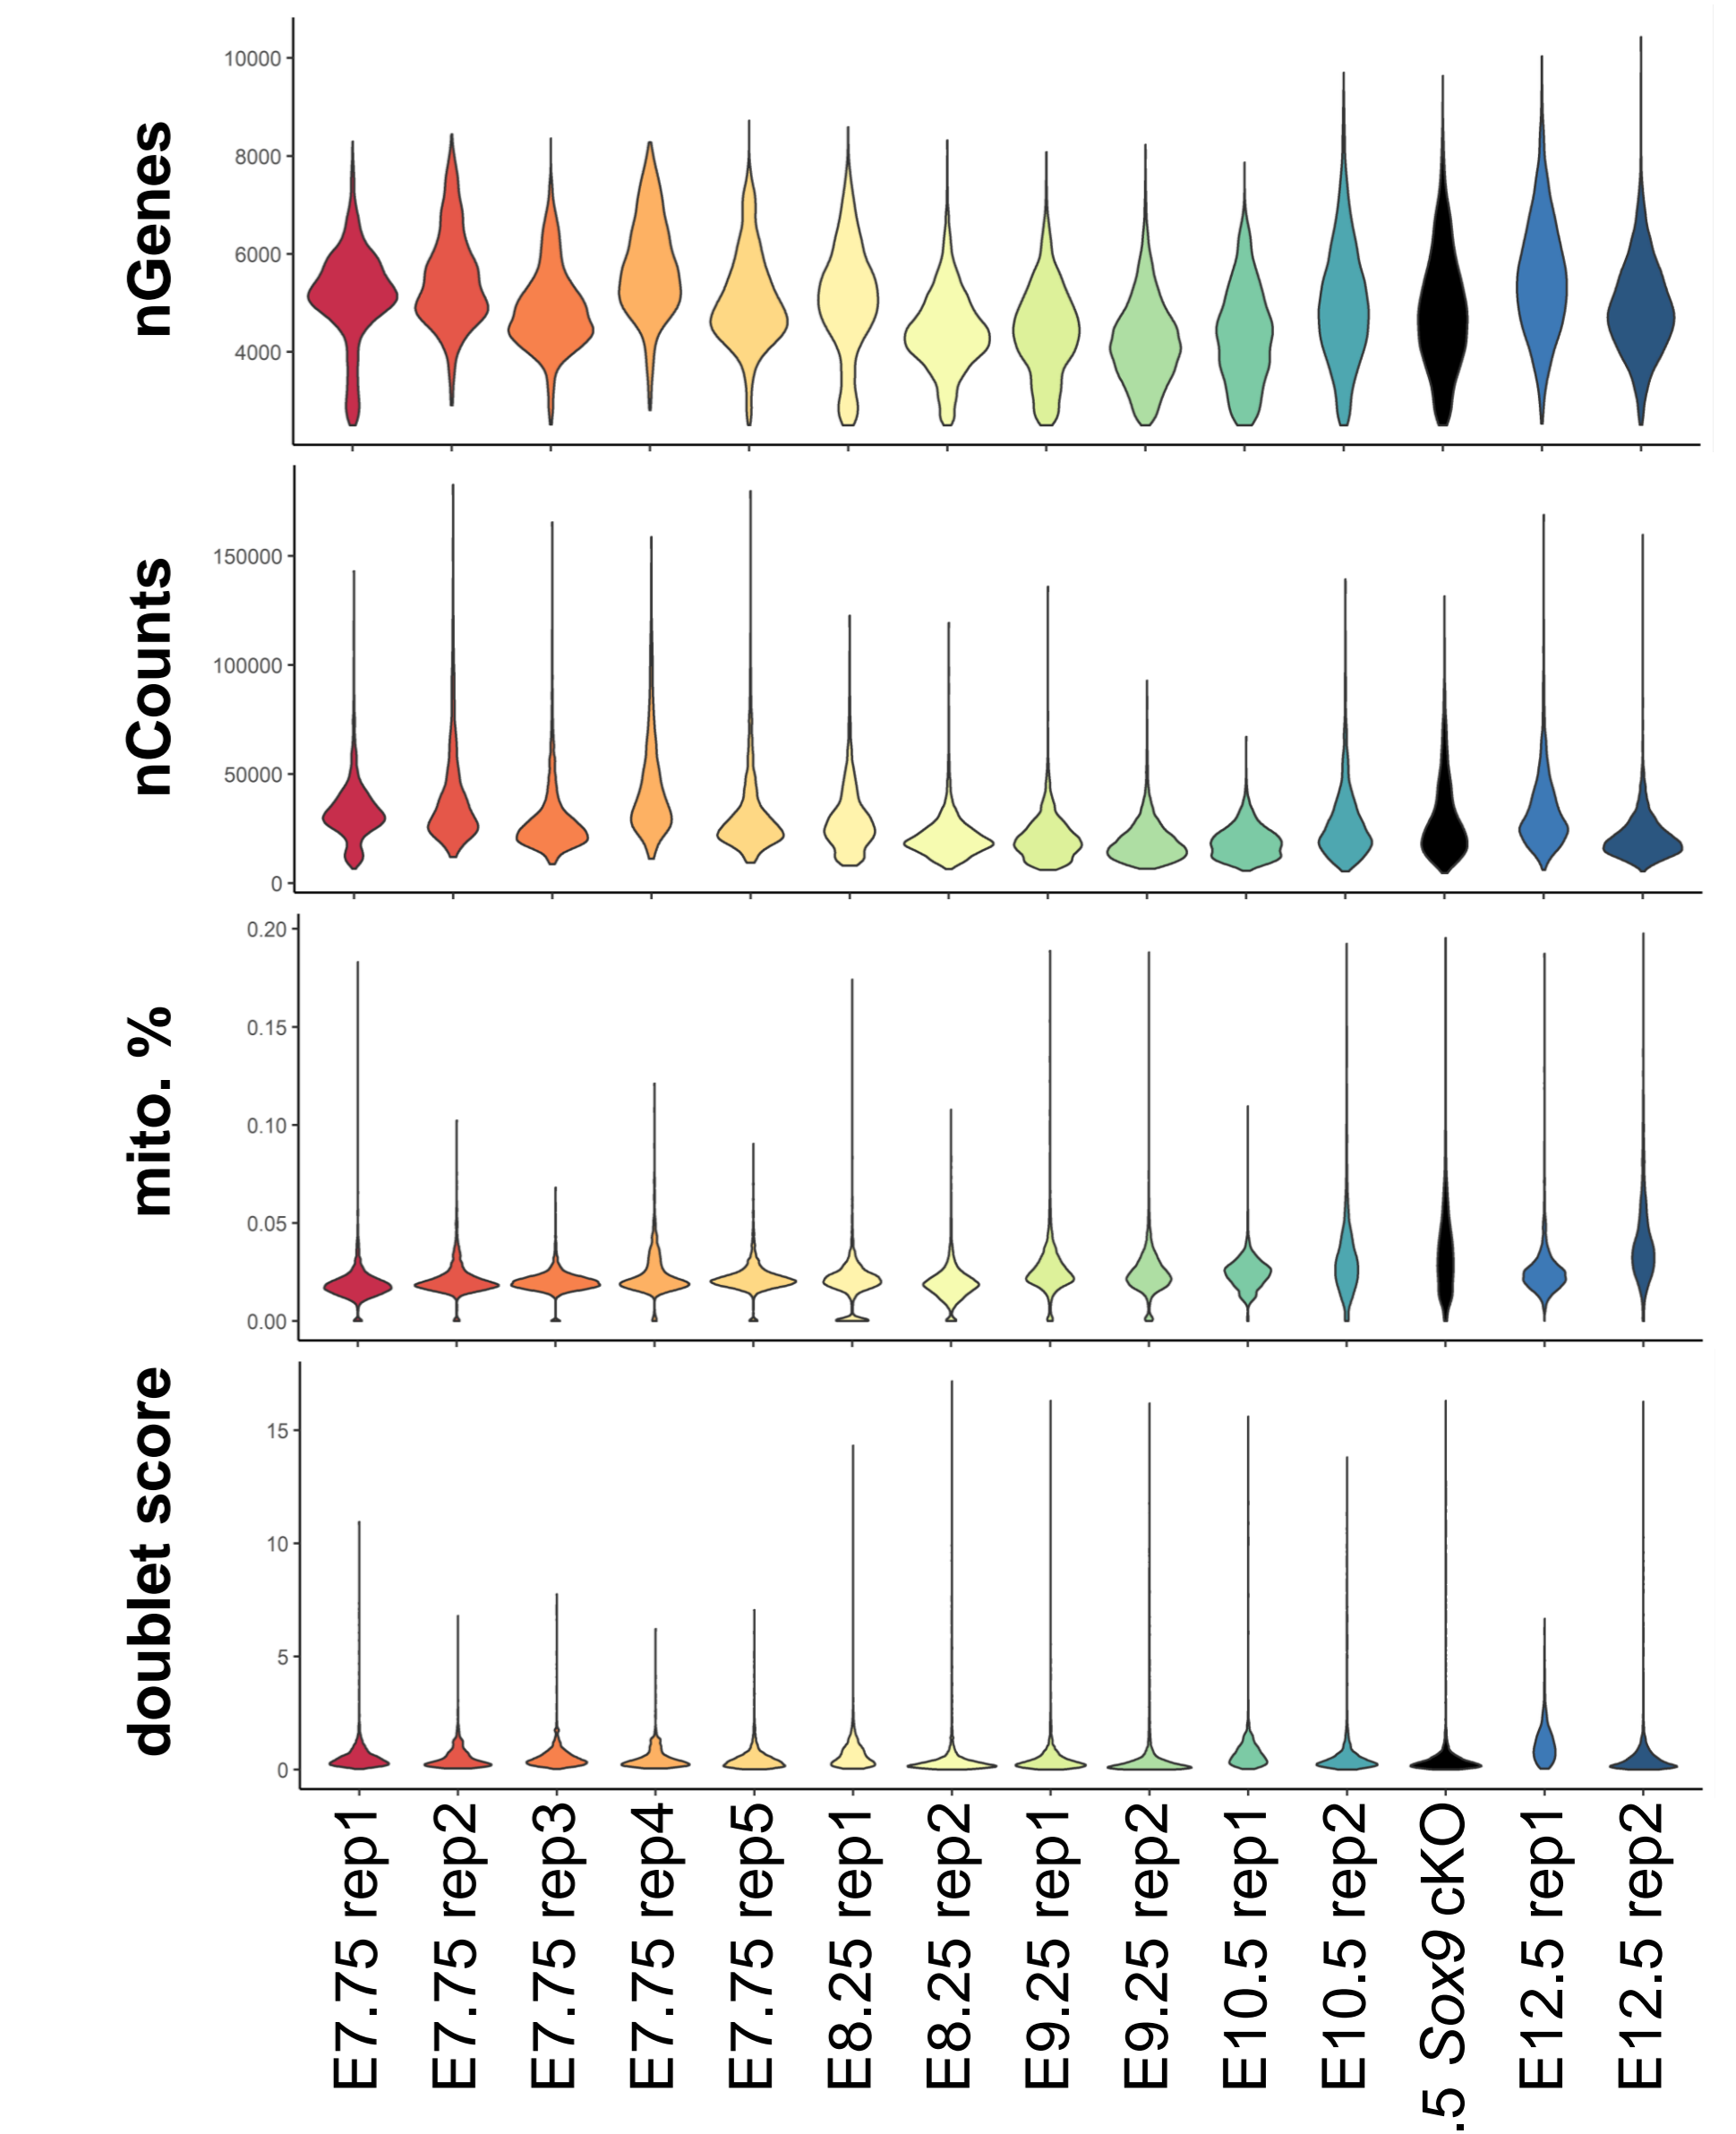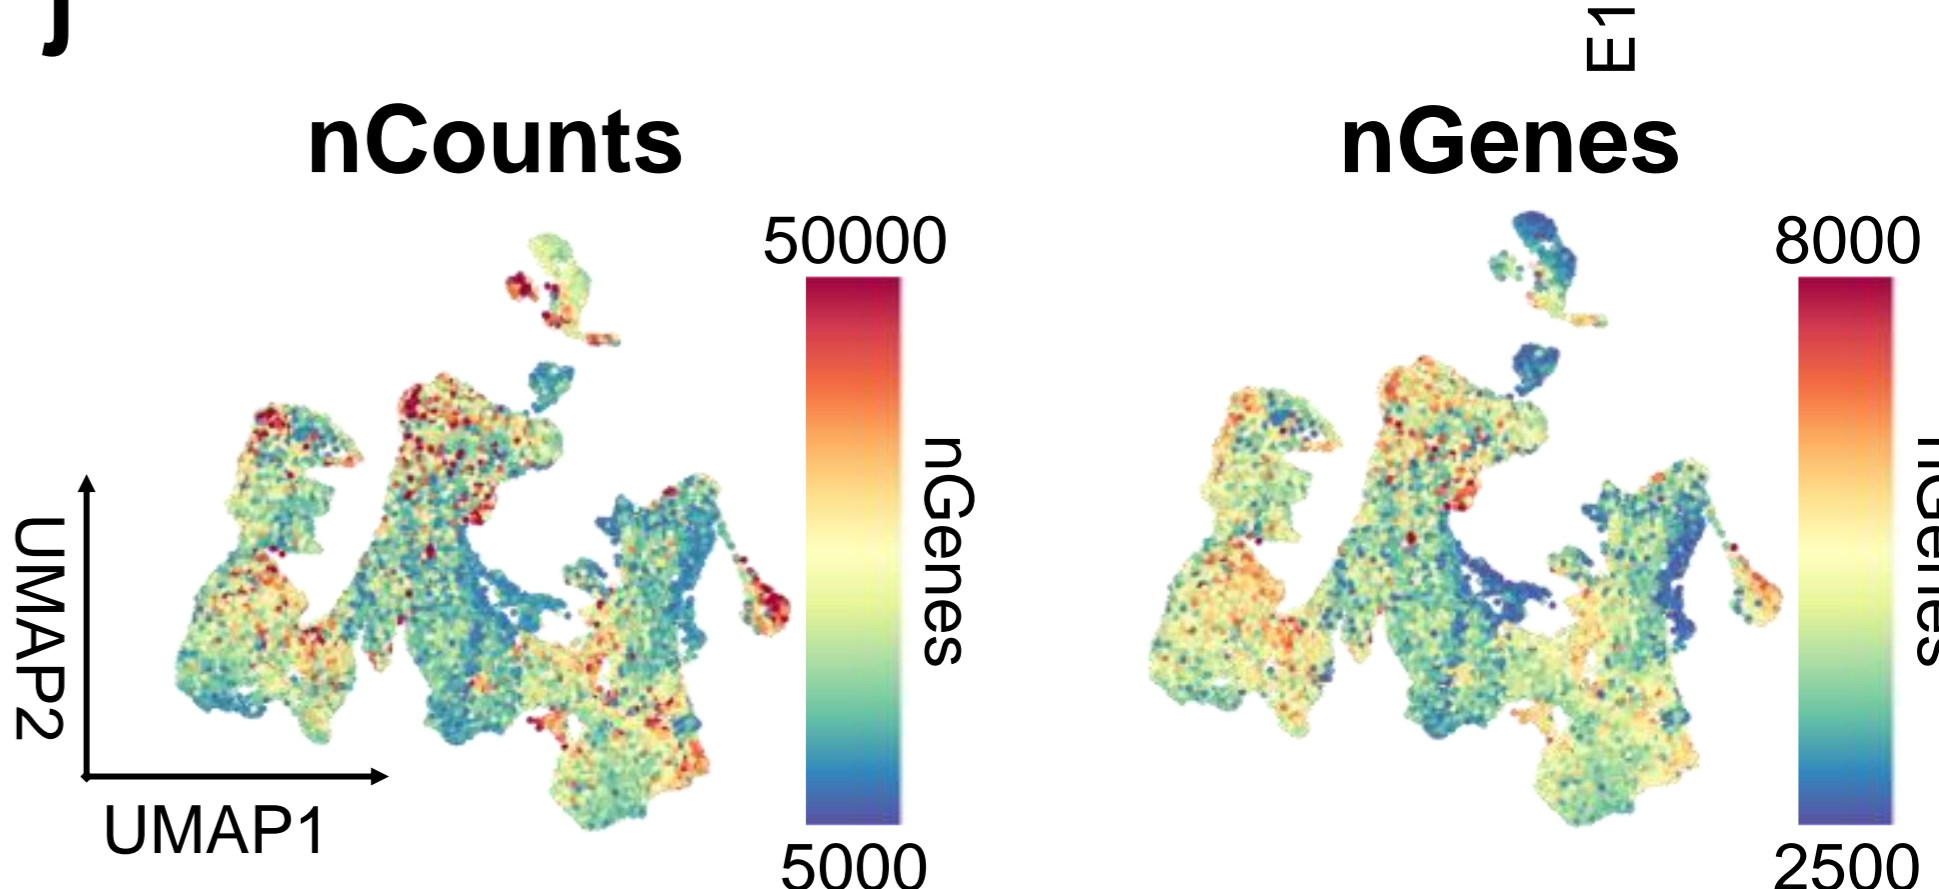

**Supplementary Figure 1.** Integration of single-cell datasets. Related to Fig. 1.

(a) Schematic outlining collection of single-cells for sequencing and target cell types. E7.75-E9.25 whole heart libraries were integrated from De Soysa *et al.* (2019), while E10.5 and E12.5 atrioventricular canal (AVC), including the *Sox9* conditional knockout (cKO) libraries are newly generated data. Red, *Tie2-cre*;tdTomato+ cells. (b-f), UMAPs displaying clusters and dot plots displaying select genes enriched within populations identified at (b) E7.75, (c) E8.25, (d) E9.25, (e) E10.5, and (f) E12.5. Size of the dot represents proportion of the cluster that expresses each gene. Colour indicates level of expression. Cluster annotations are coloured based on their inclusion in endothelial-derived and epicardial subsets. (g) UMAPs showing origin and replicate distribution in the complete dataset. (h) Timepoint contribution to each cluster identified in complete dataset. The frequency of endothelial and mesenchymal populations is increased in libraries generated at E10.5 and E12.5 due to the microdissection of AVCs at these stages. (i) Violin plots displaying quality metrics for complete dataset, displaying doublet score, mitochondrial percent, nCounts, and nGenes for each replicate. (j) UMAPs showing nCounts and nGenes distribution in complete dataset. AV, atrioventricular; AVC, atrioventricular canal; mito, mitochondrial; SHF, second heart field, STM, septum transversum mesenchyme. Source Data are provided as a Source Data file.

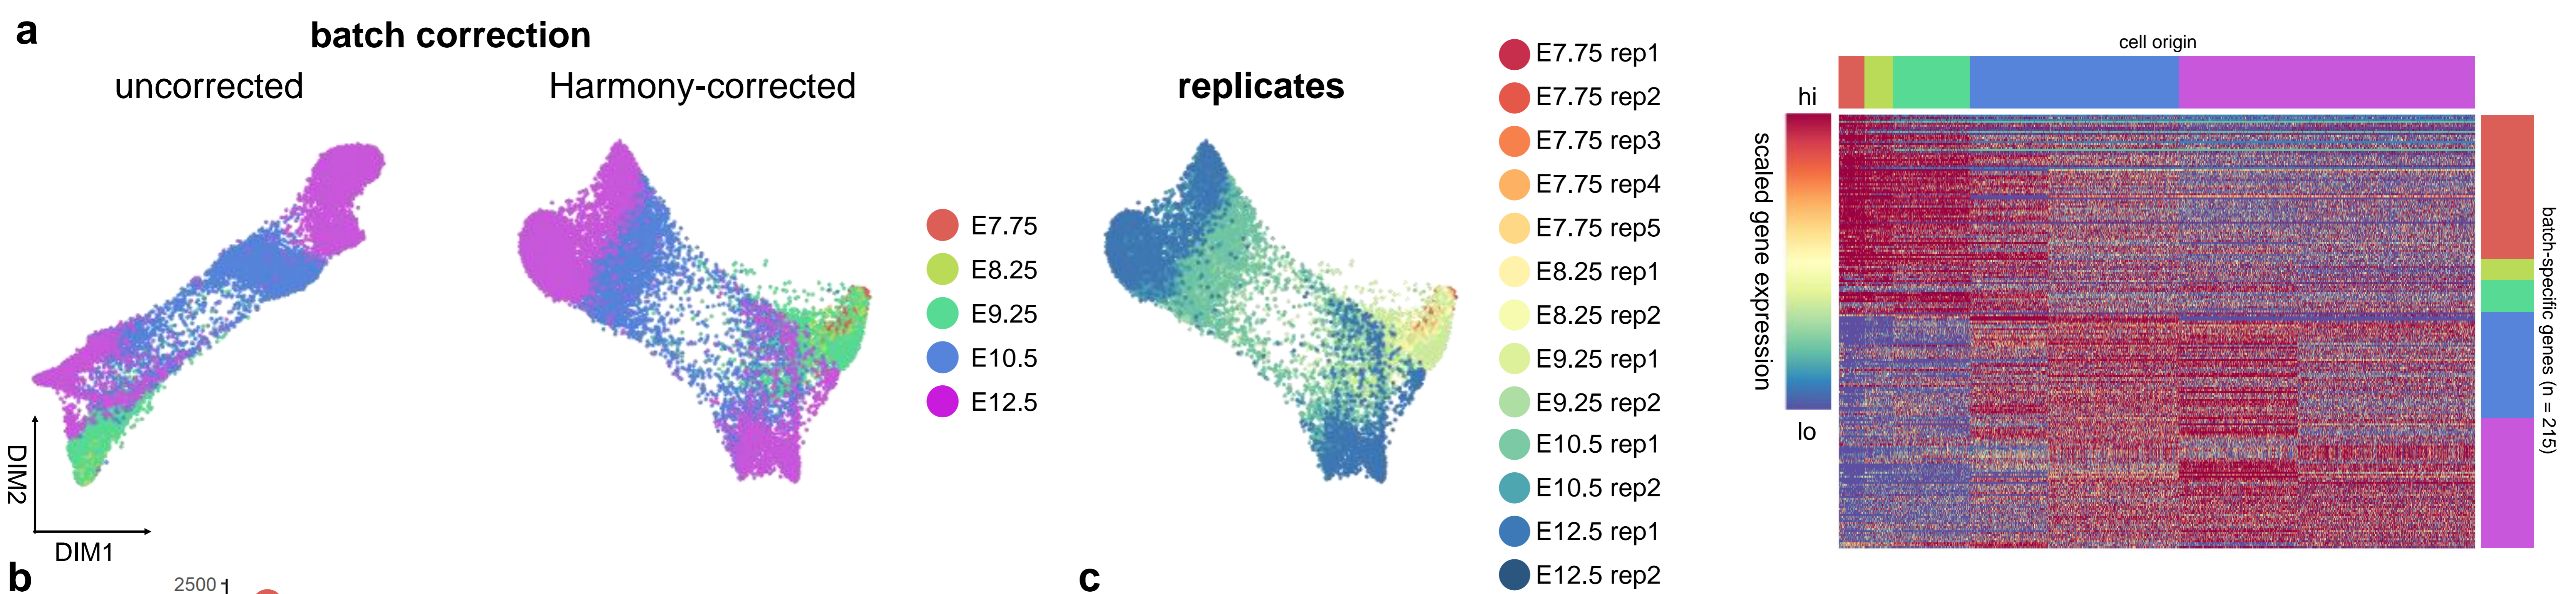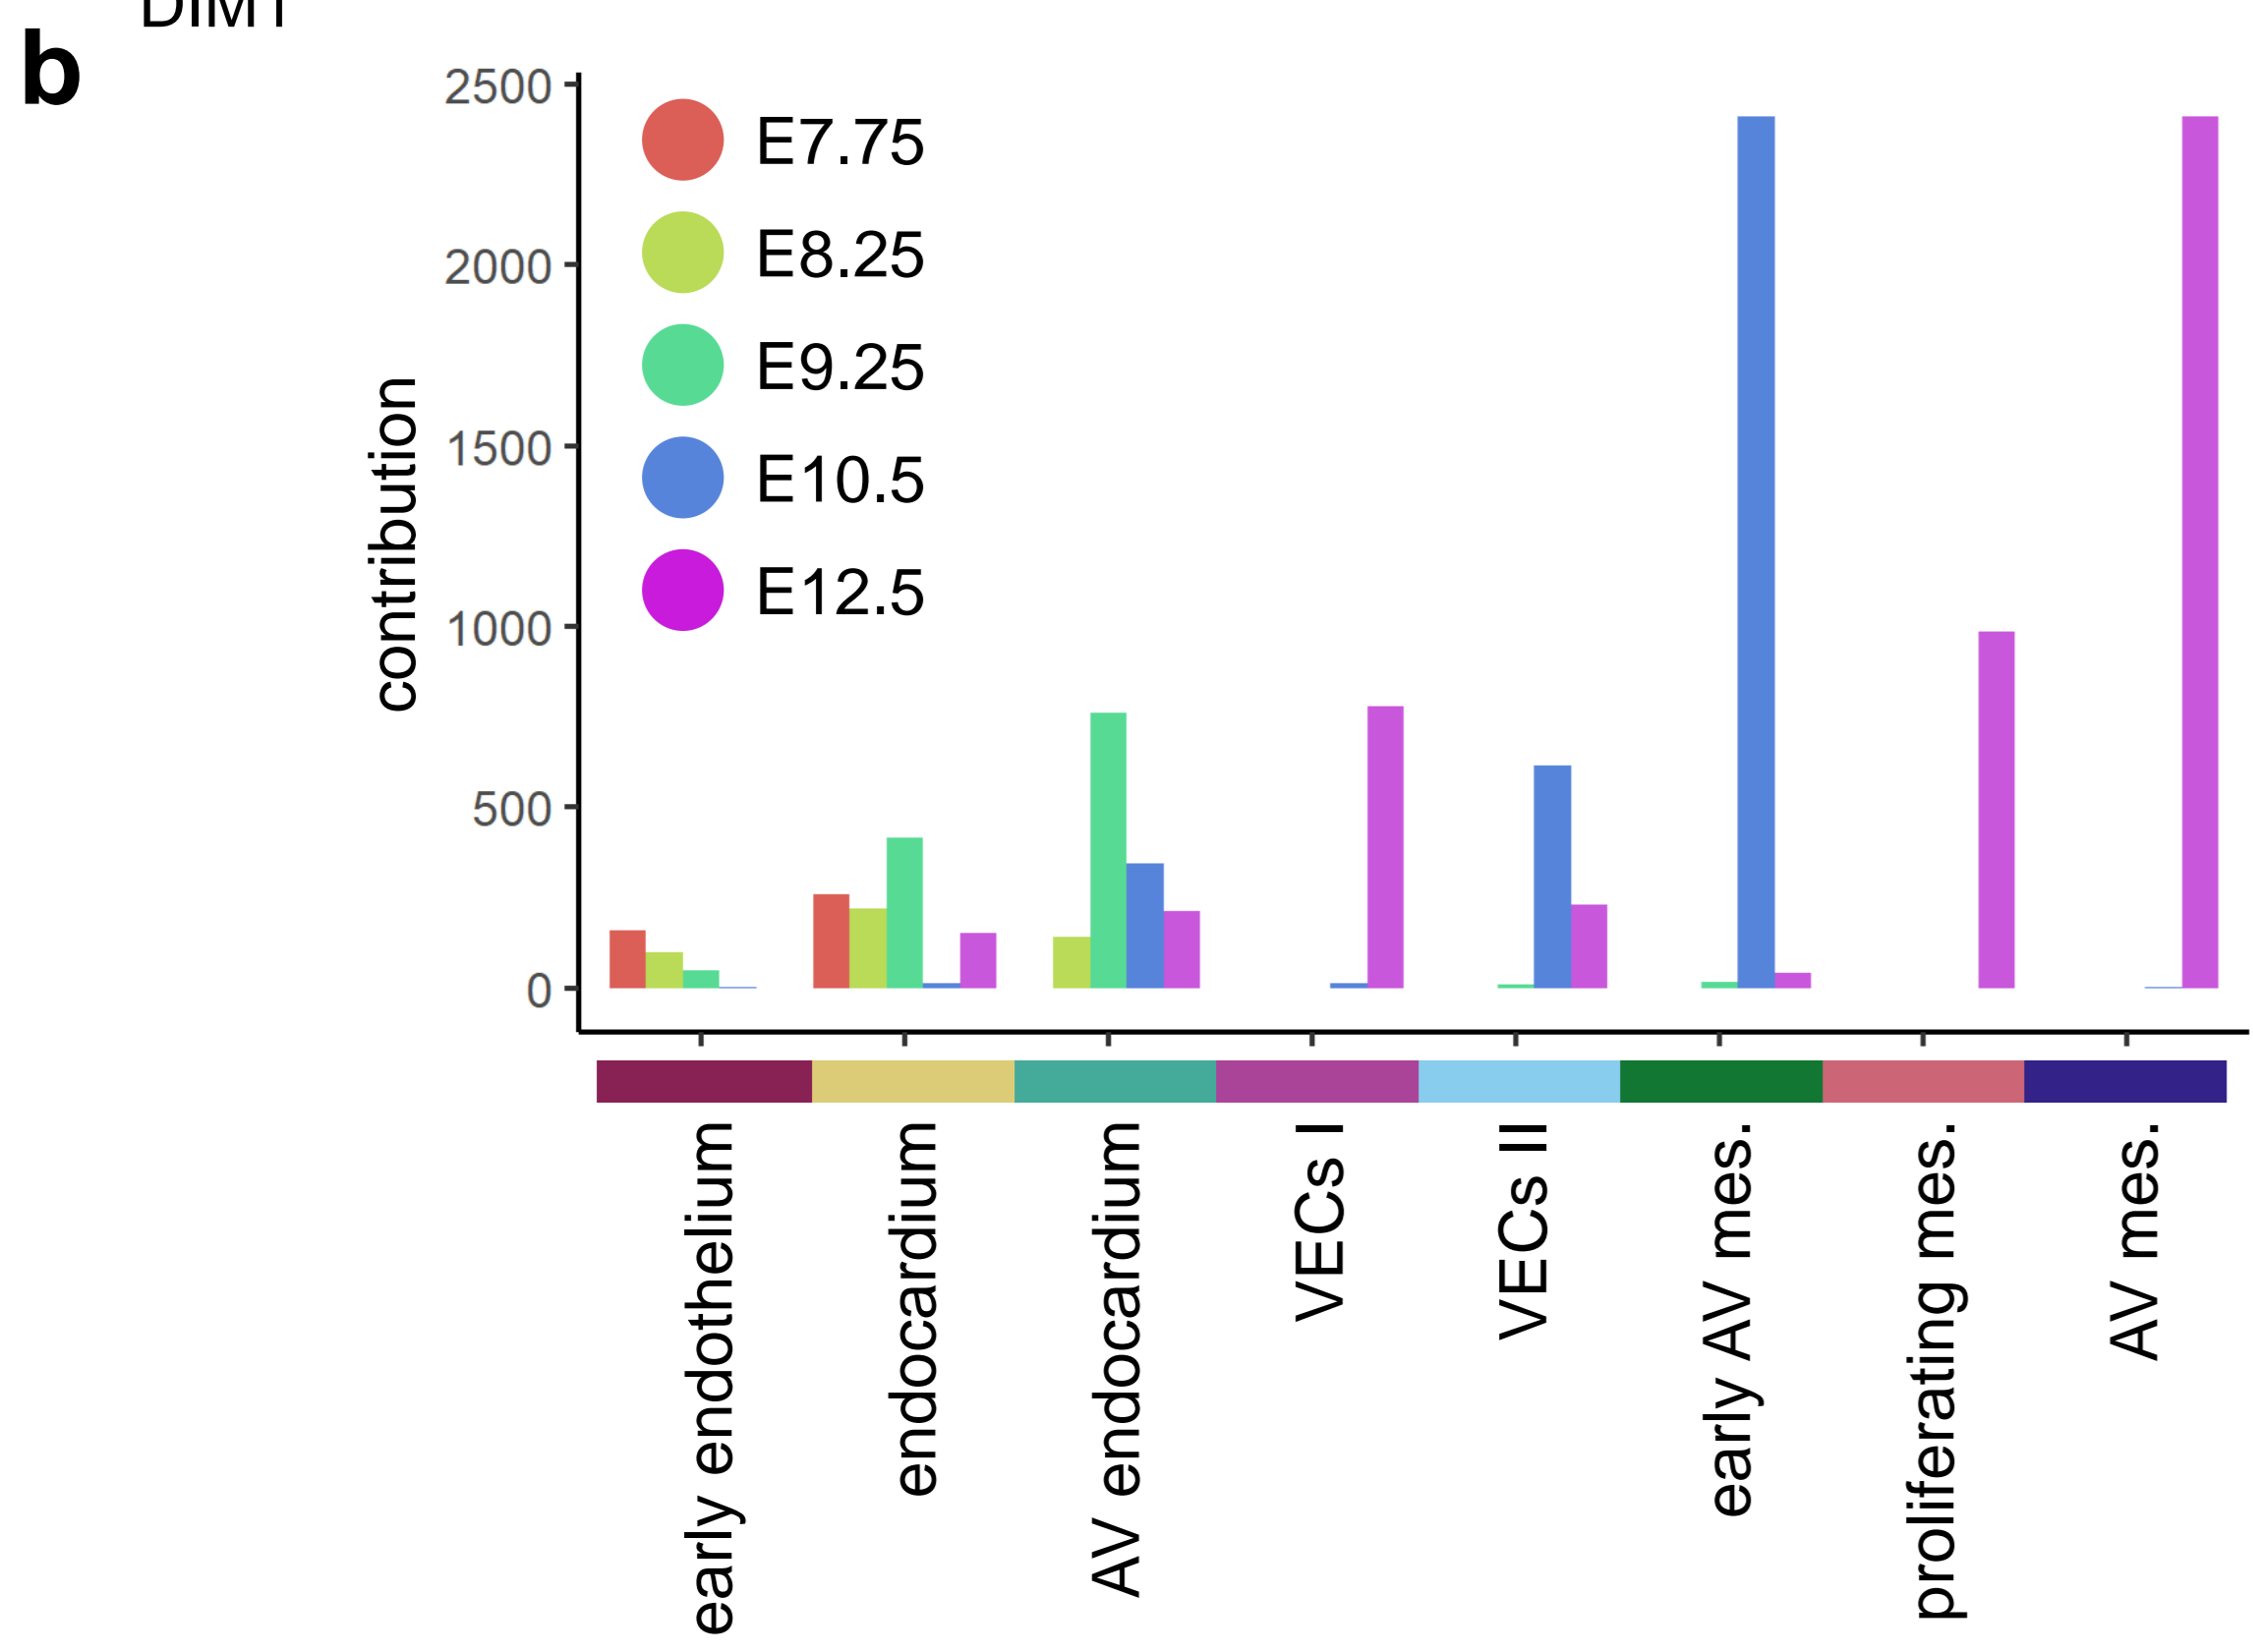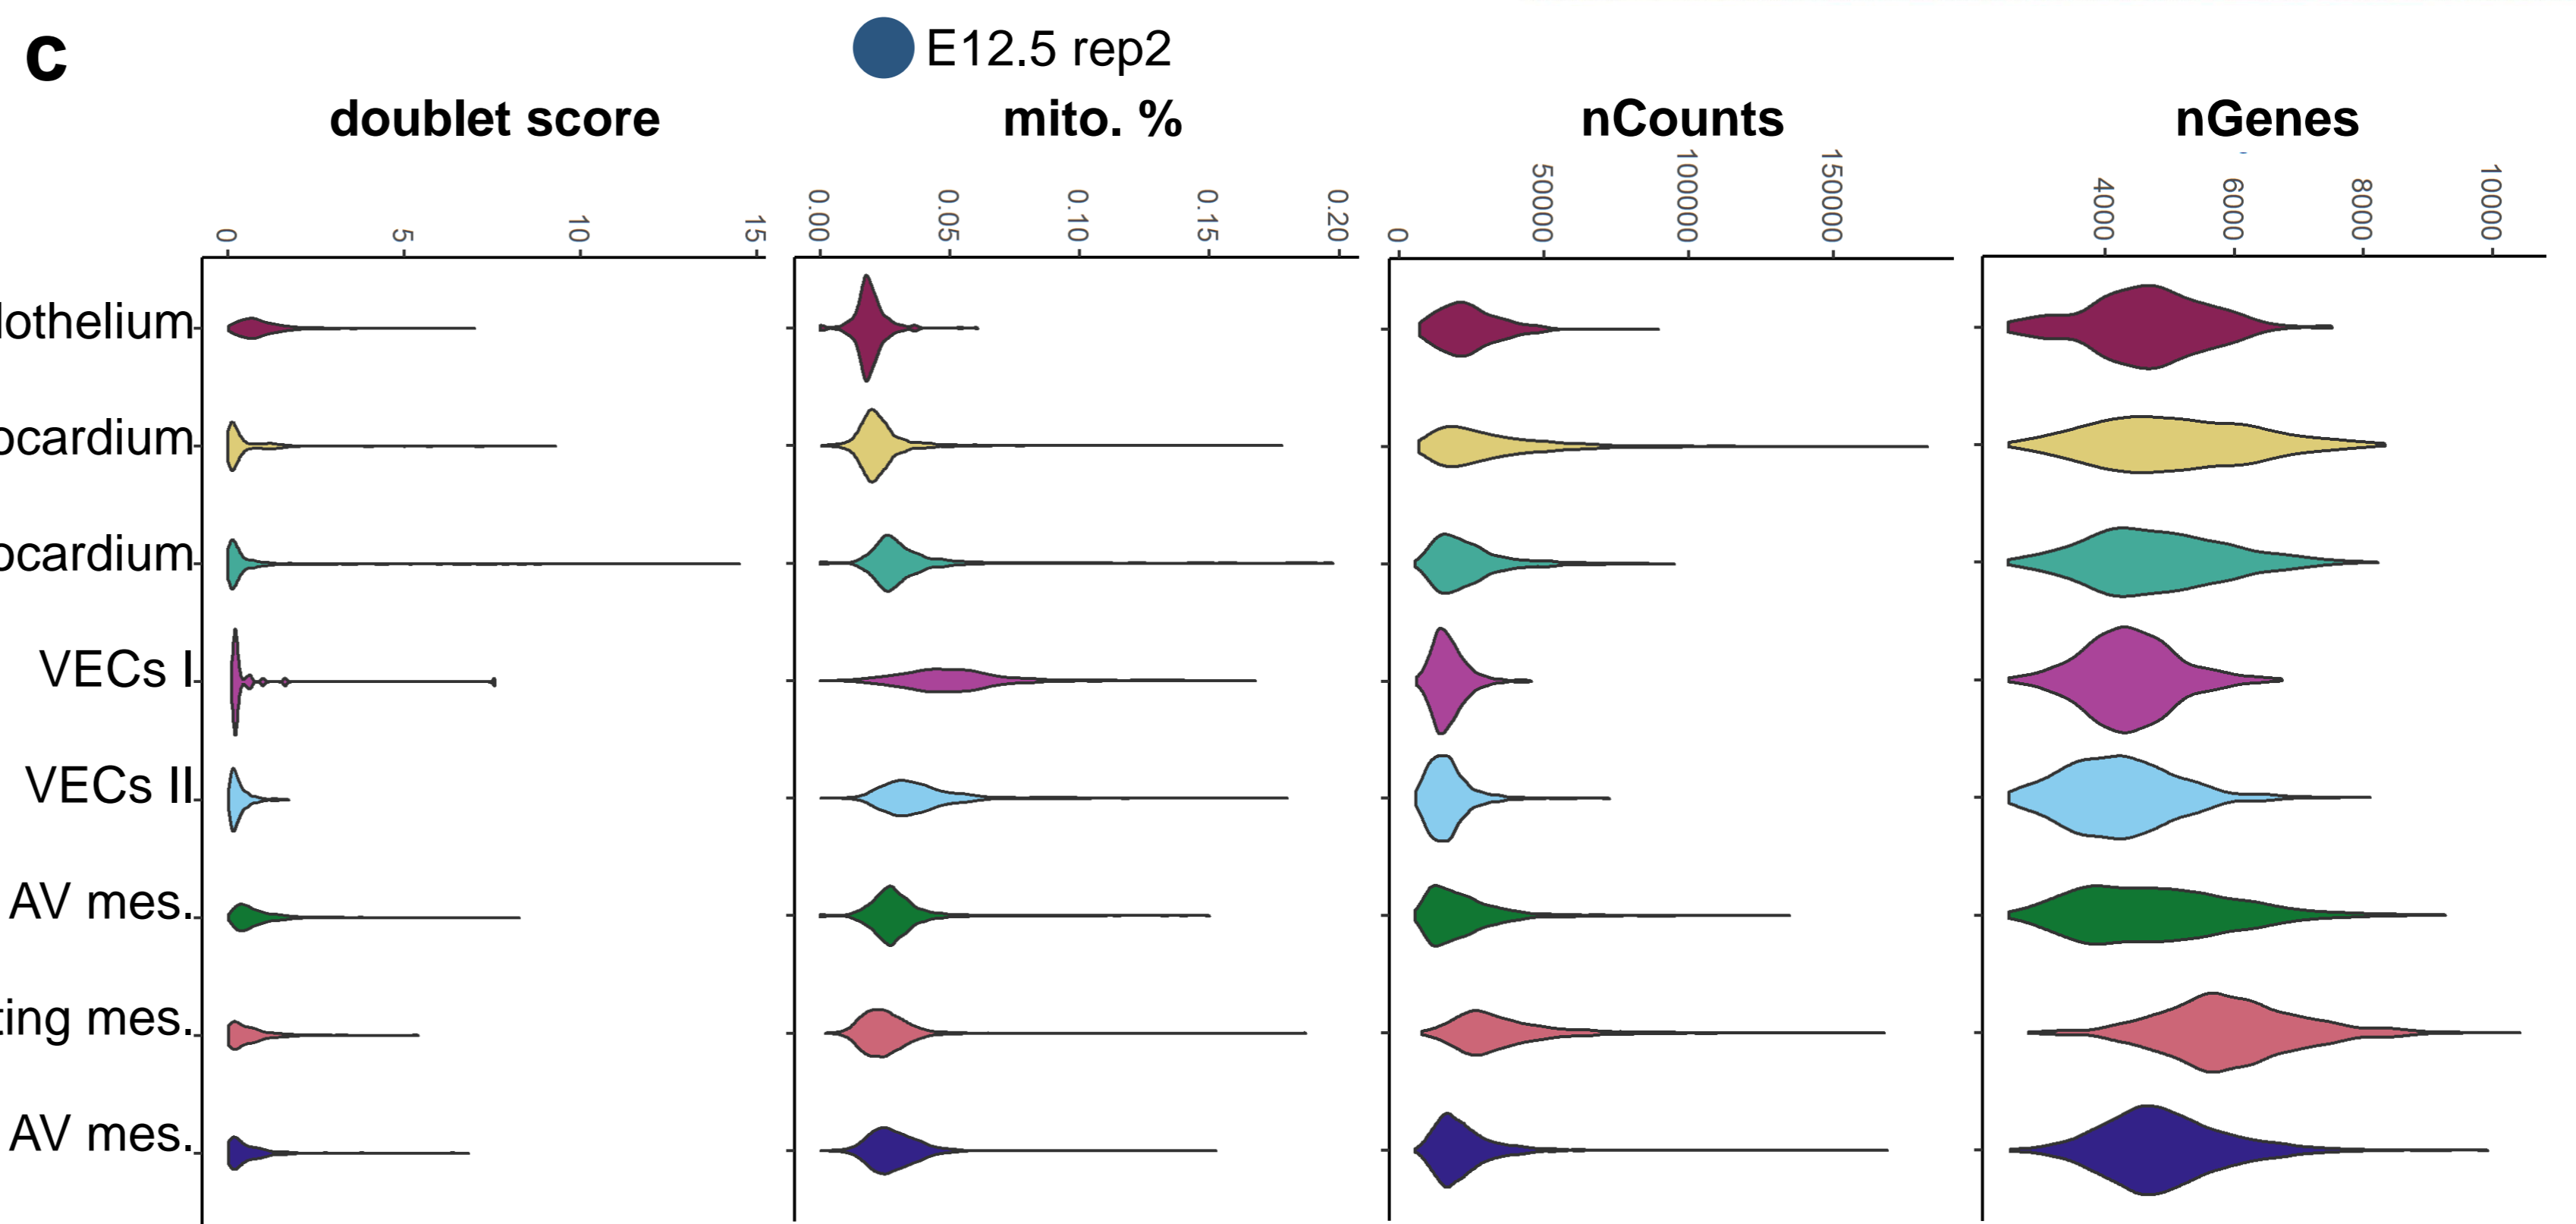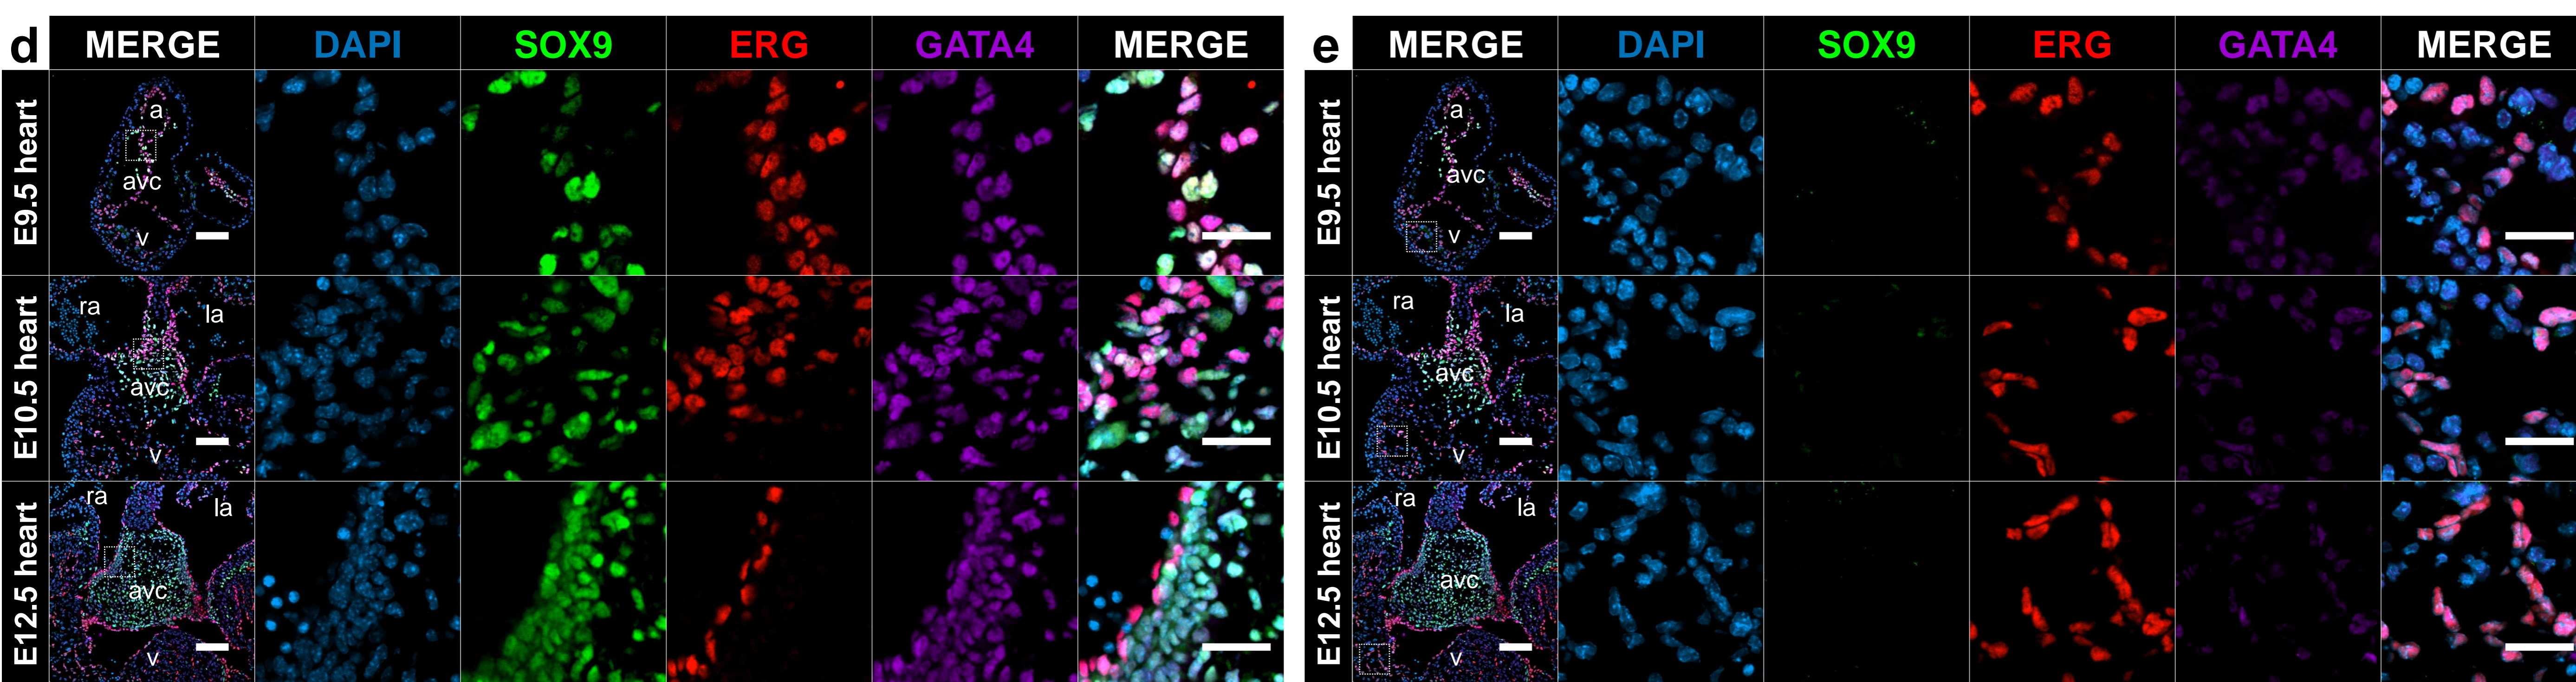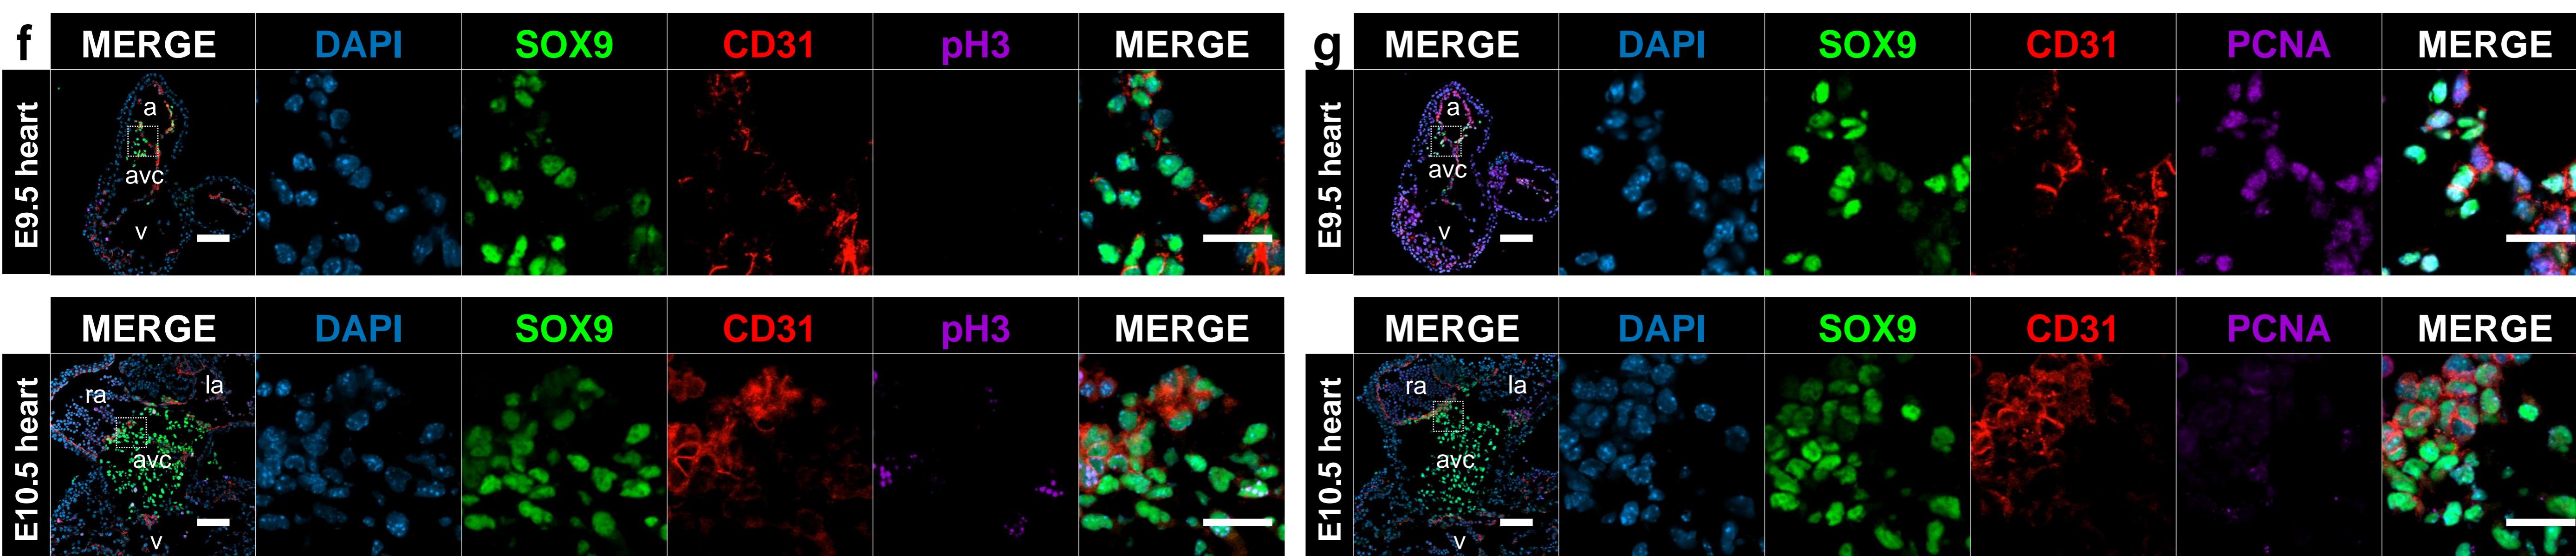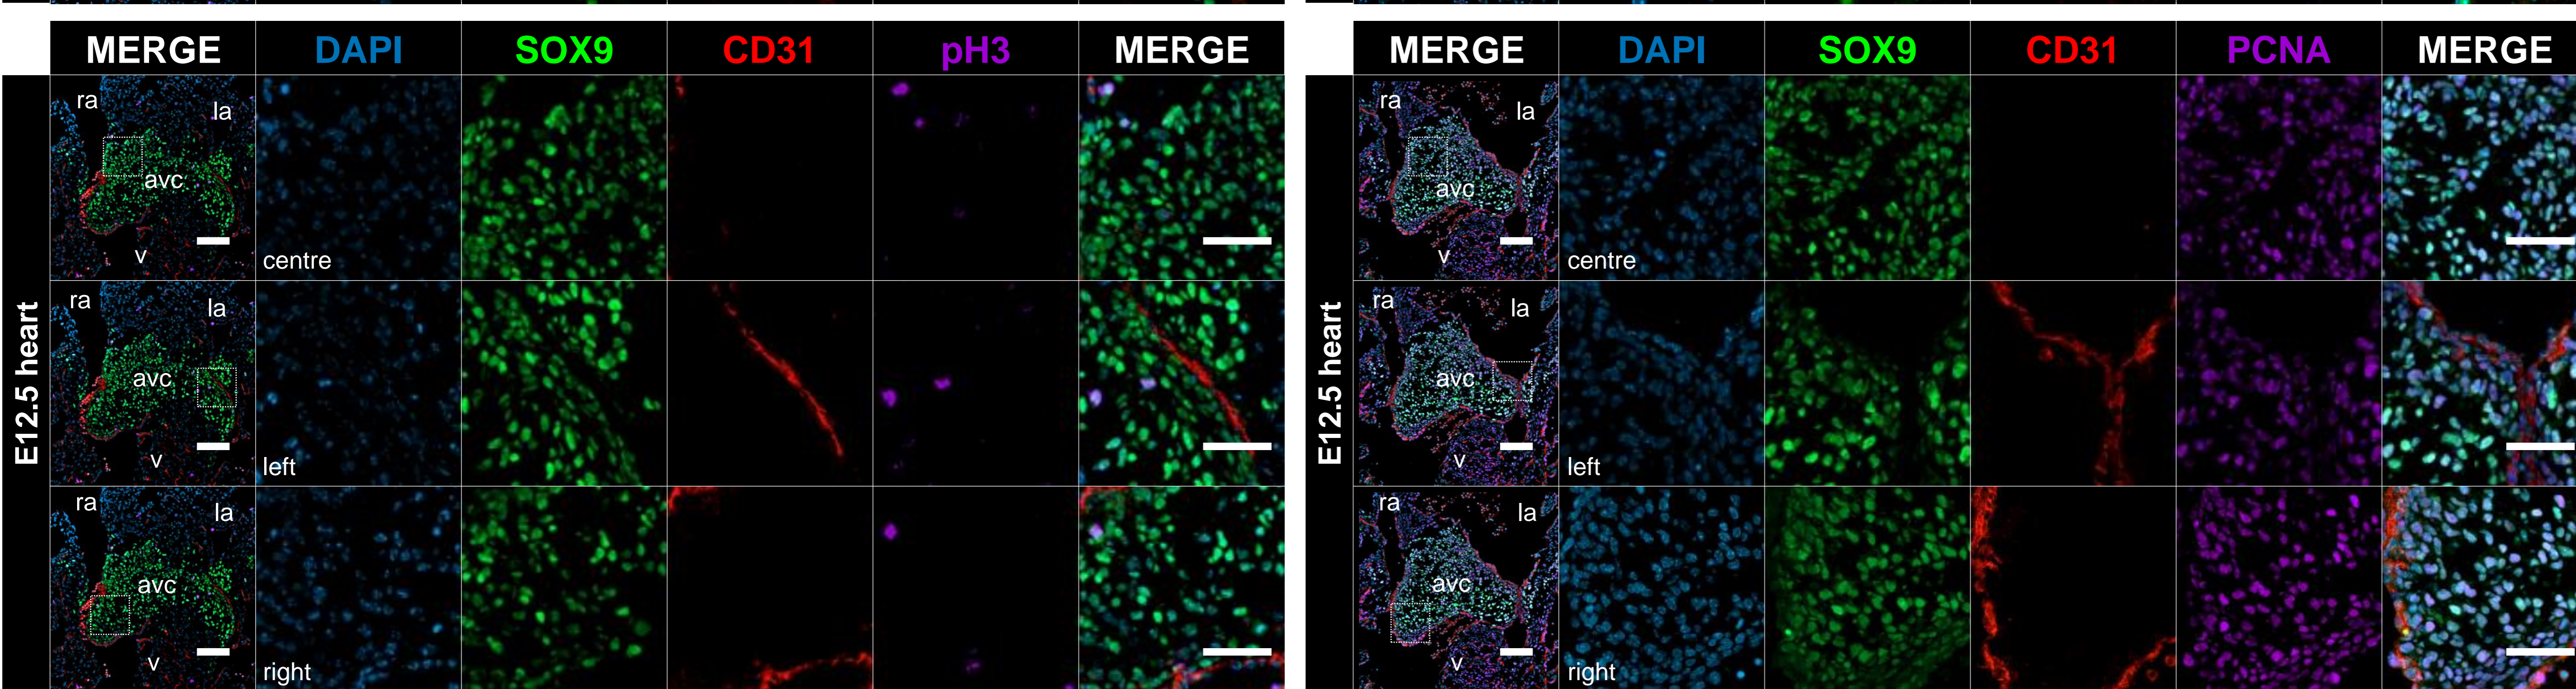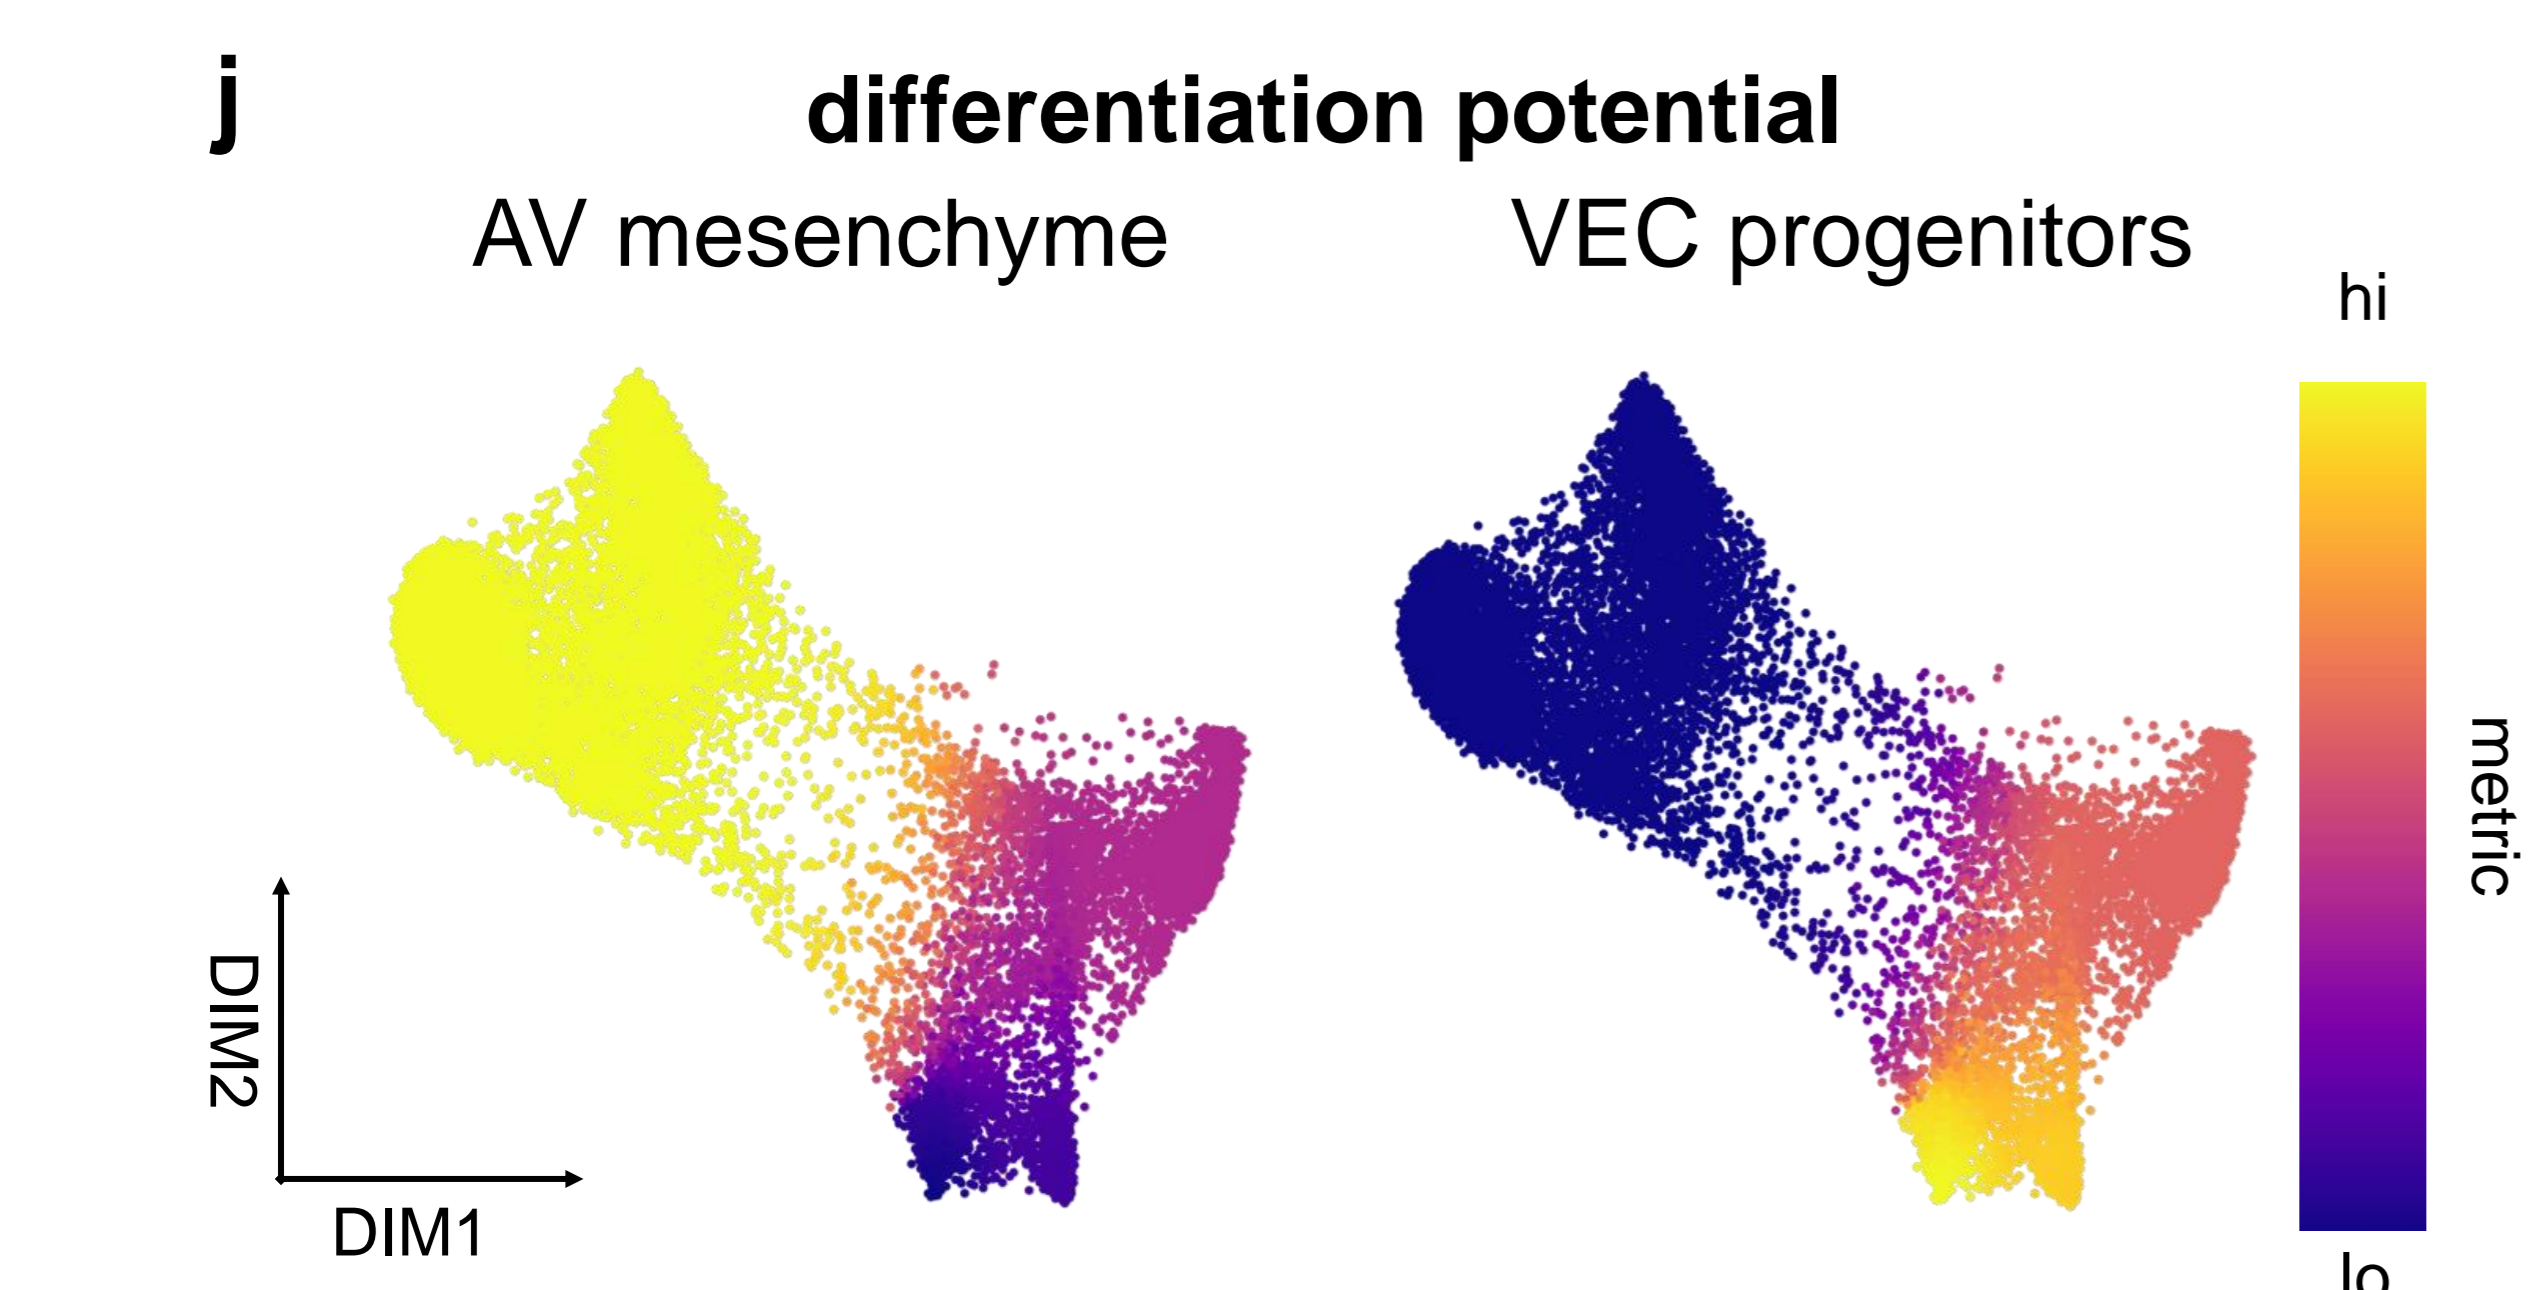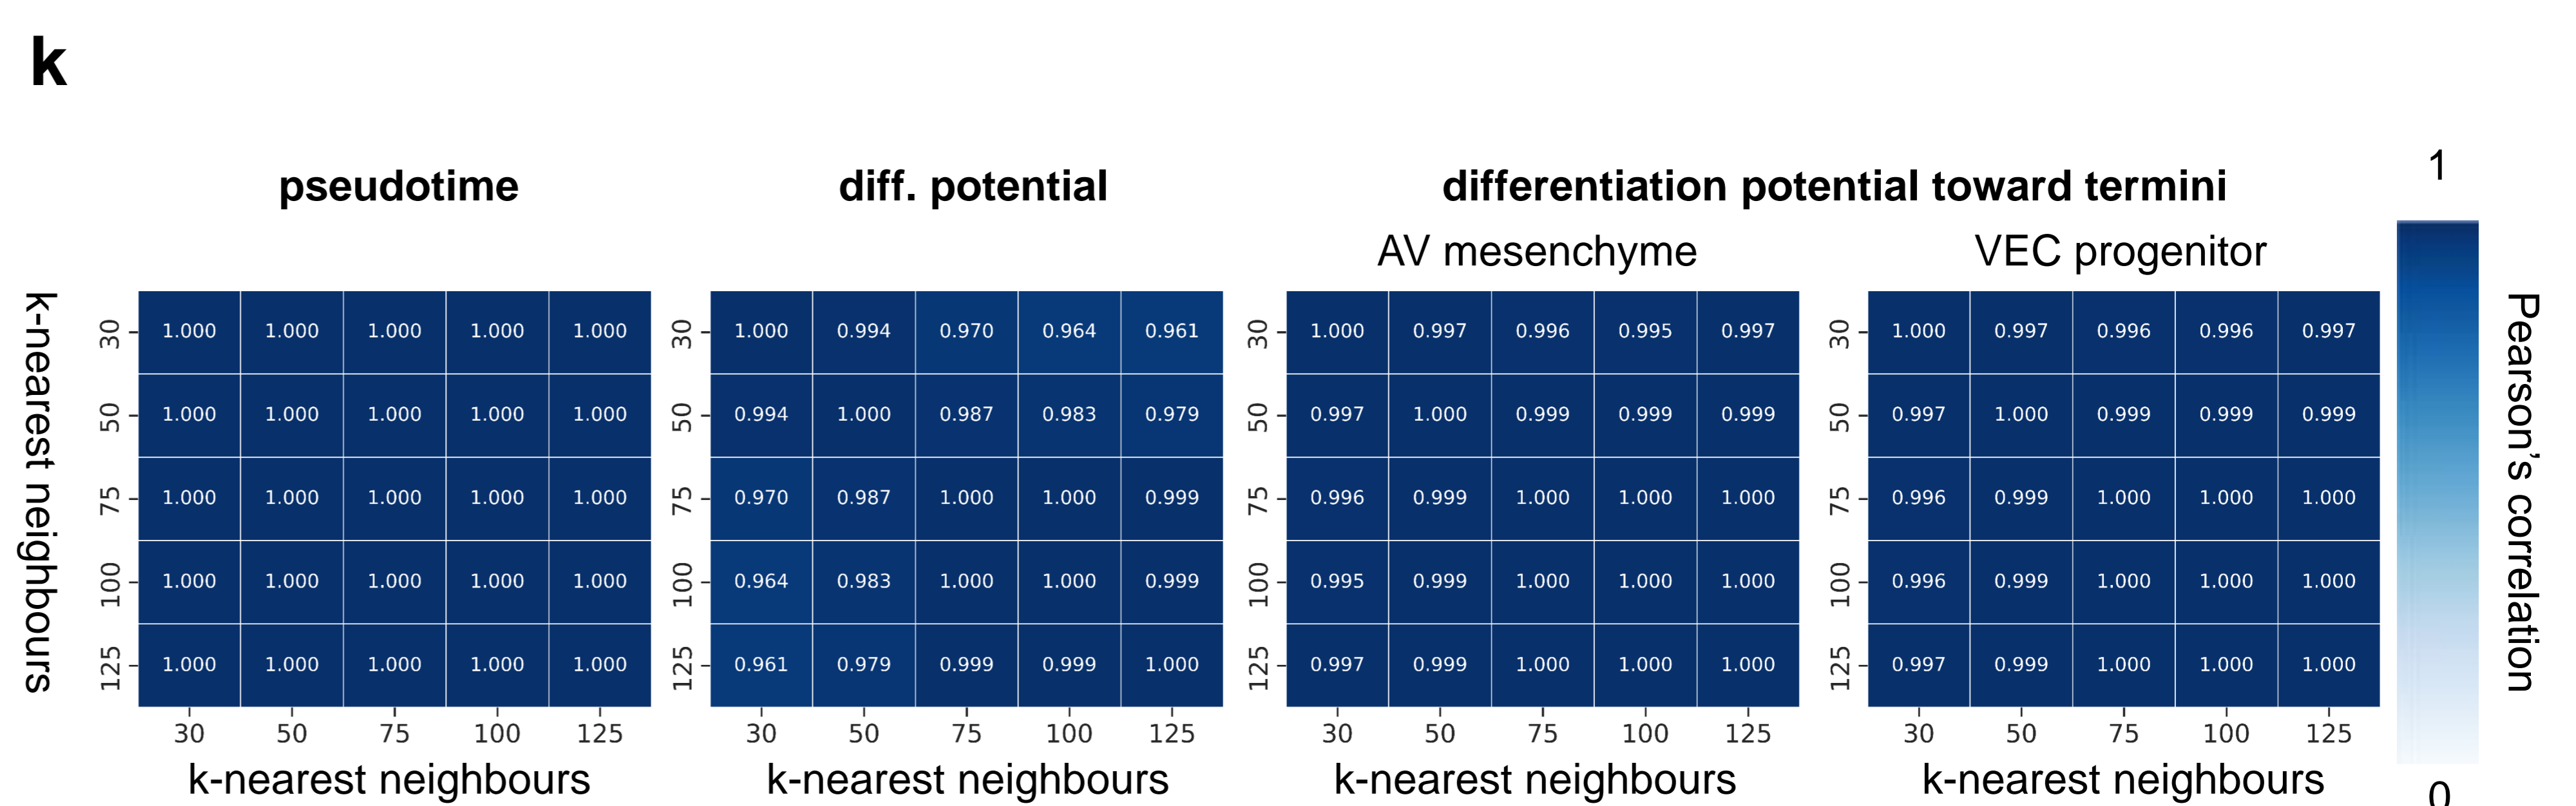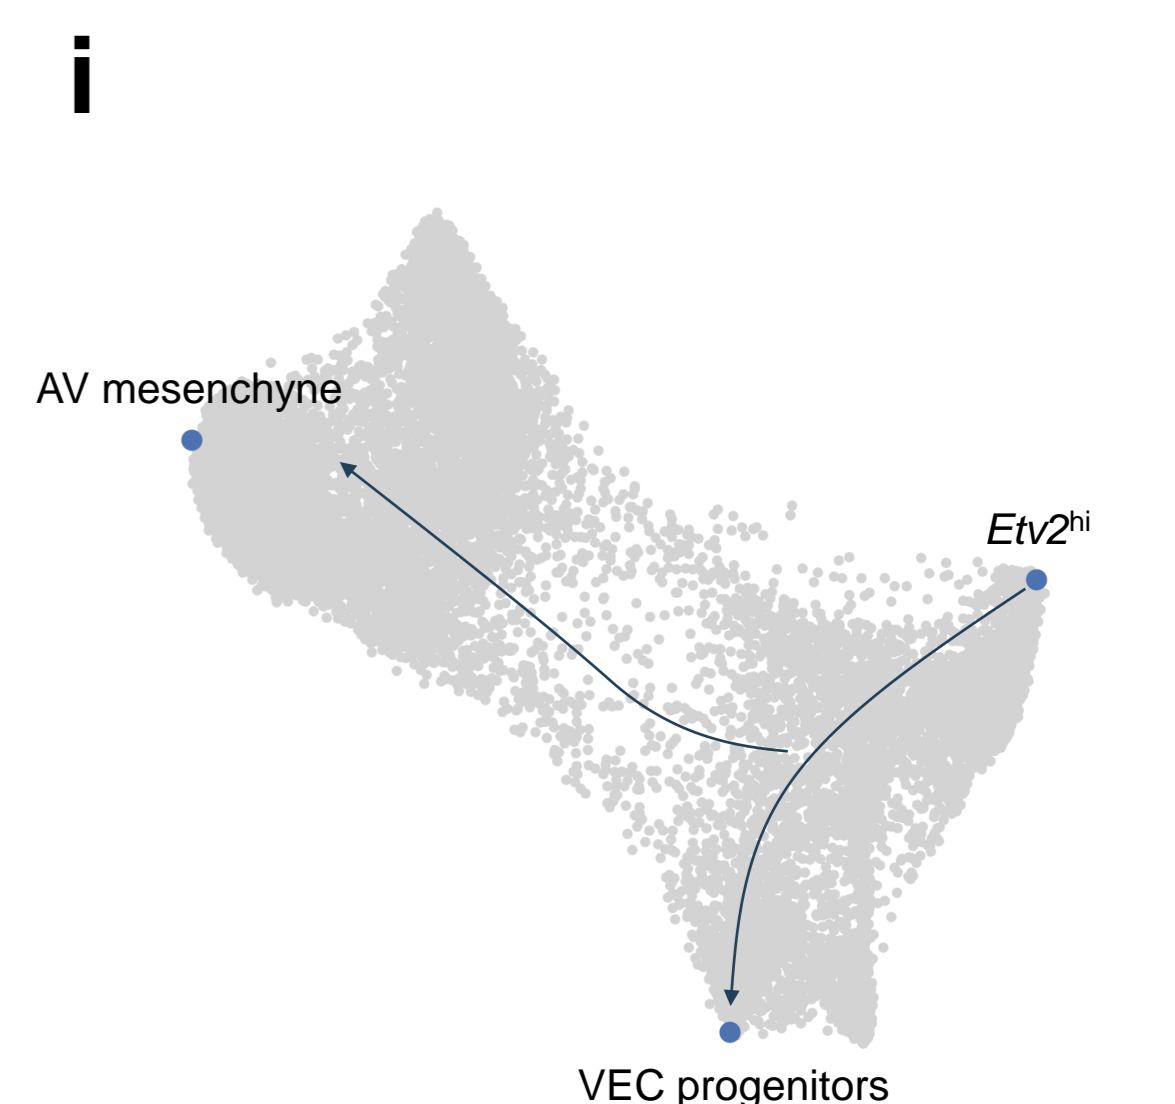

**Supplementary Figure 2.** Characterization of endocardial-derived lineages of the atrioventricular canal. Related to Fig. 2.

(a) Force-directed layouts and a heatmap showing timepoint distribution before and after Harmony correction as well as replicate distribution and batch-associated genes in endothelial-derived lineages. (b) Timepoint contribution to each cluster identified in endothelial-derived lineages. (c) Violin plots displaying doublet score, mitochondrial percent, nCounts, and nGenes for each cluster identified in endothelial-derived lineages. SOX9, ERG, and GATA4 staining in (d) AVCs and (e) ventricles at E9.25, E10.5, and E12.5, showing significantly higher expression of GATA4 within endocardial lineages of the AVC. Immunostaining of proliferative markers, including (f) phospho-histone H3 (pH3) and (g) PCNA, along with markers of mesenchymal (SOX9) and endothelial (CD31) identity in AVCs from E9.5, E10.5, and E12.5. (h) Quantification of proliferation across domains of the AVC at E12.5, showing no significant differences between central, left lateral, or right lateral cushions (two-tailed unpaired t-test). (i) Force-directed layout showing termini and rough trajectory for Palantir analysis. (j) Force-directed layouts showing differentiation potential toward AV mesenchymal and valve endocardial cell (VEC) progenitor terminal states in endothelial-derived lineages. (k) Palantir results are robust when varying nearest-neighbor input, k. Plots show Pearson's correlation for pseudotime, differentiation (diff.) potential, and branch probability between pairs of Palantir runs. For box plots, the centre line represents the median value, where the bounds of the box span the interquartile range and whiskers represent minimum and maximum values, excluding outliers. Immunostaining results validated in  $n \geq 3$  independent experiments. Scale bars, 100 $\mu$ m, 25 $\mu$ m in ROIs. AV, atrioventricular; AVC, atrioventricular canal; mes., mesenchyme; VECs, valve endocardial cells. Source Data are provided as a Source Data file.

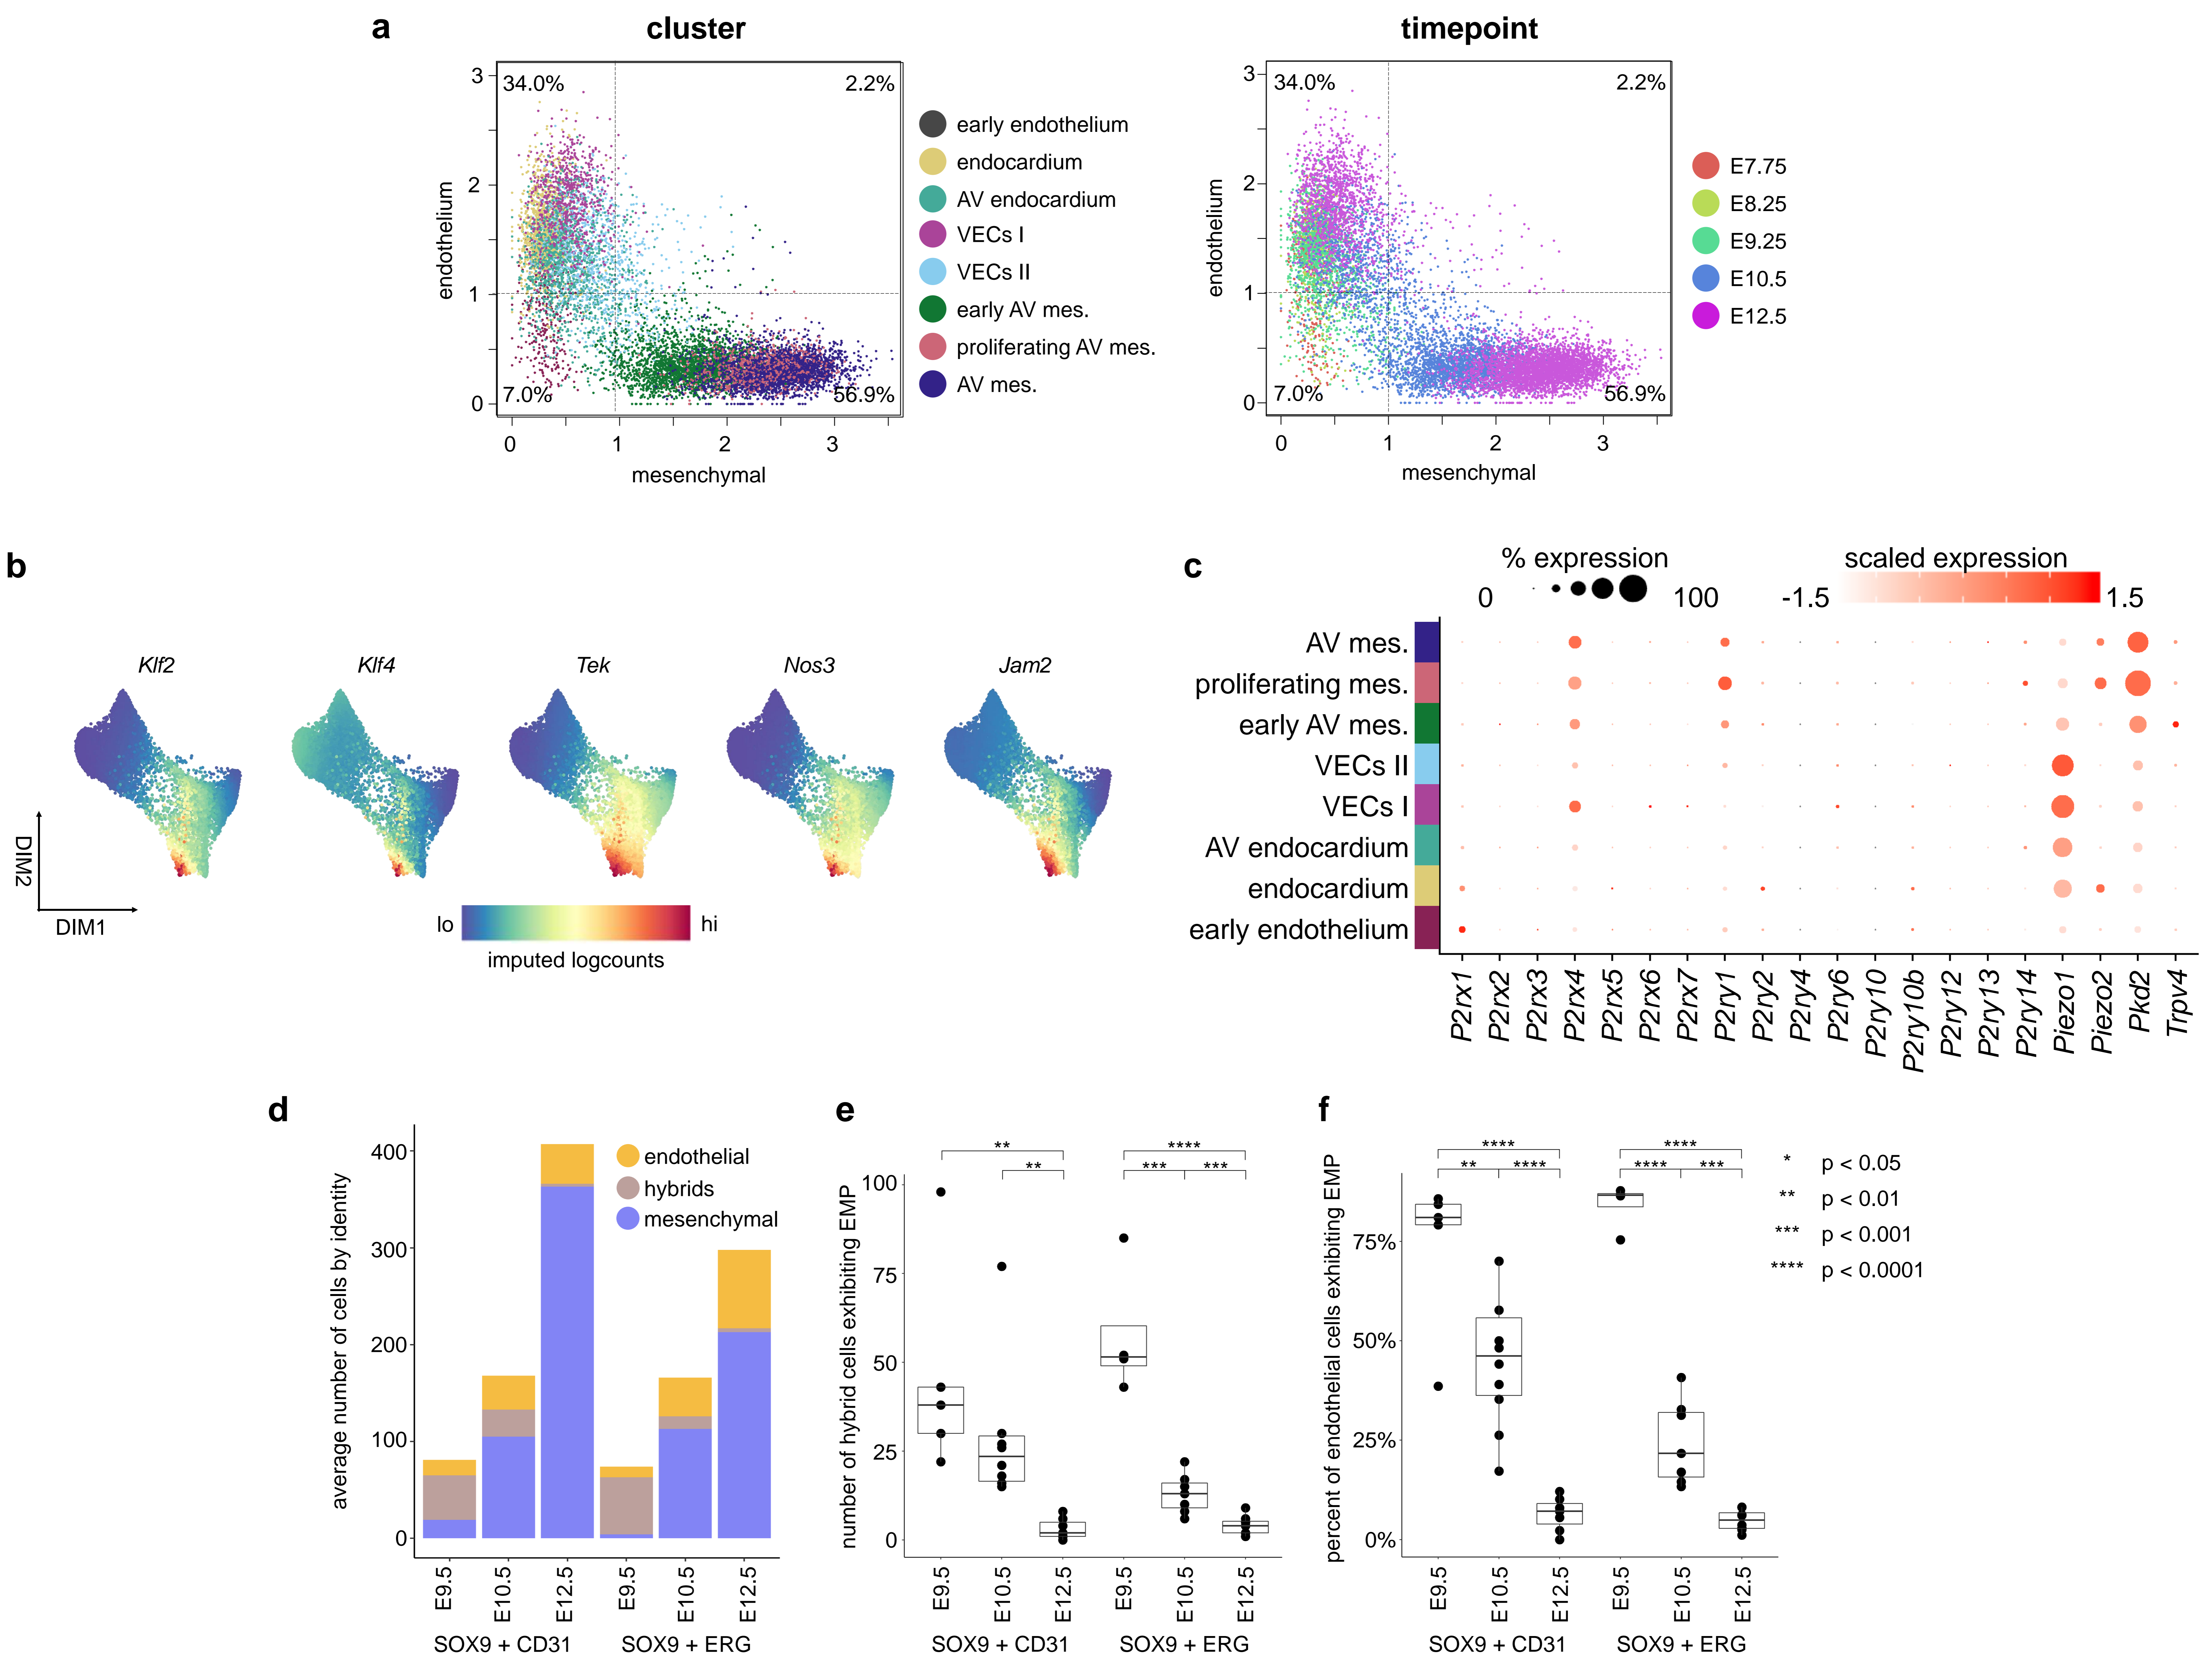

**Supplementary Figure 3.** Cell plasticity in endocardial-derived cell lineages during the endocardial-to-mesenchymal transition. Related to Fig. 3.

(a) Scatterplot comparing the endothelial and mesenchymal gene profiles either by timepoint or cluster. (b) Force-directed layouts displaying imputed gene expression of select fluid shear stress response genes. (c) Dot plot displaying expression of mechanoreceptors within endocardial-derived clusters during EndMT. Size of the dot represents proportion of the cluster that expresses each gene. Colour indicates level of expression. (d) Average number of endocardial, mesenchymal, and hybrid (EMP) cells in AVCs from E9.5, E10.5, and E12.5, showing notably reduced EMP by E12.5. (e) Number and (f) proportion of endothelial cells exhibiting EMP in AVCs from E9.5, E10.5, and E12.5, showing reduced numbers and overall proportions over time. All quantifications were performed on sections from  $n \geq 3$  hearts (two-tailed unpaired t-test). For box plots, the line in the centre represents the median value, where the bounds of the box span the interquartile range and whiskers represent minimum and maximum values, excluding outliers. AV, atrioventricular; EMP, endothelial-mesenchymal plasticity; mes., mesenchyme; VECs, valve endocardial cells. Source Data are provided as a Source Data file.

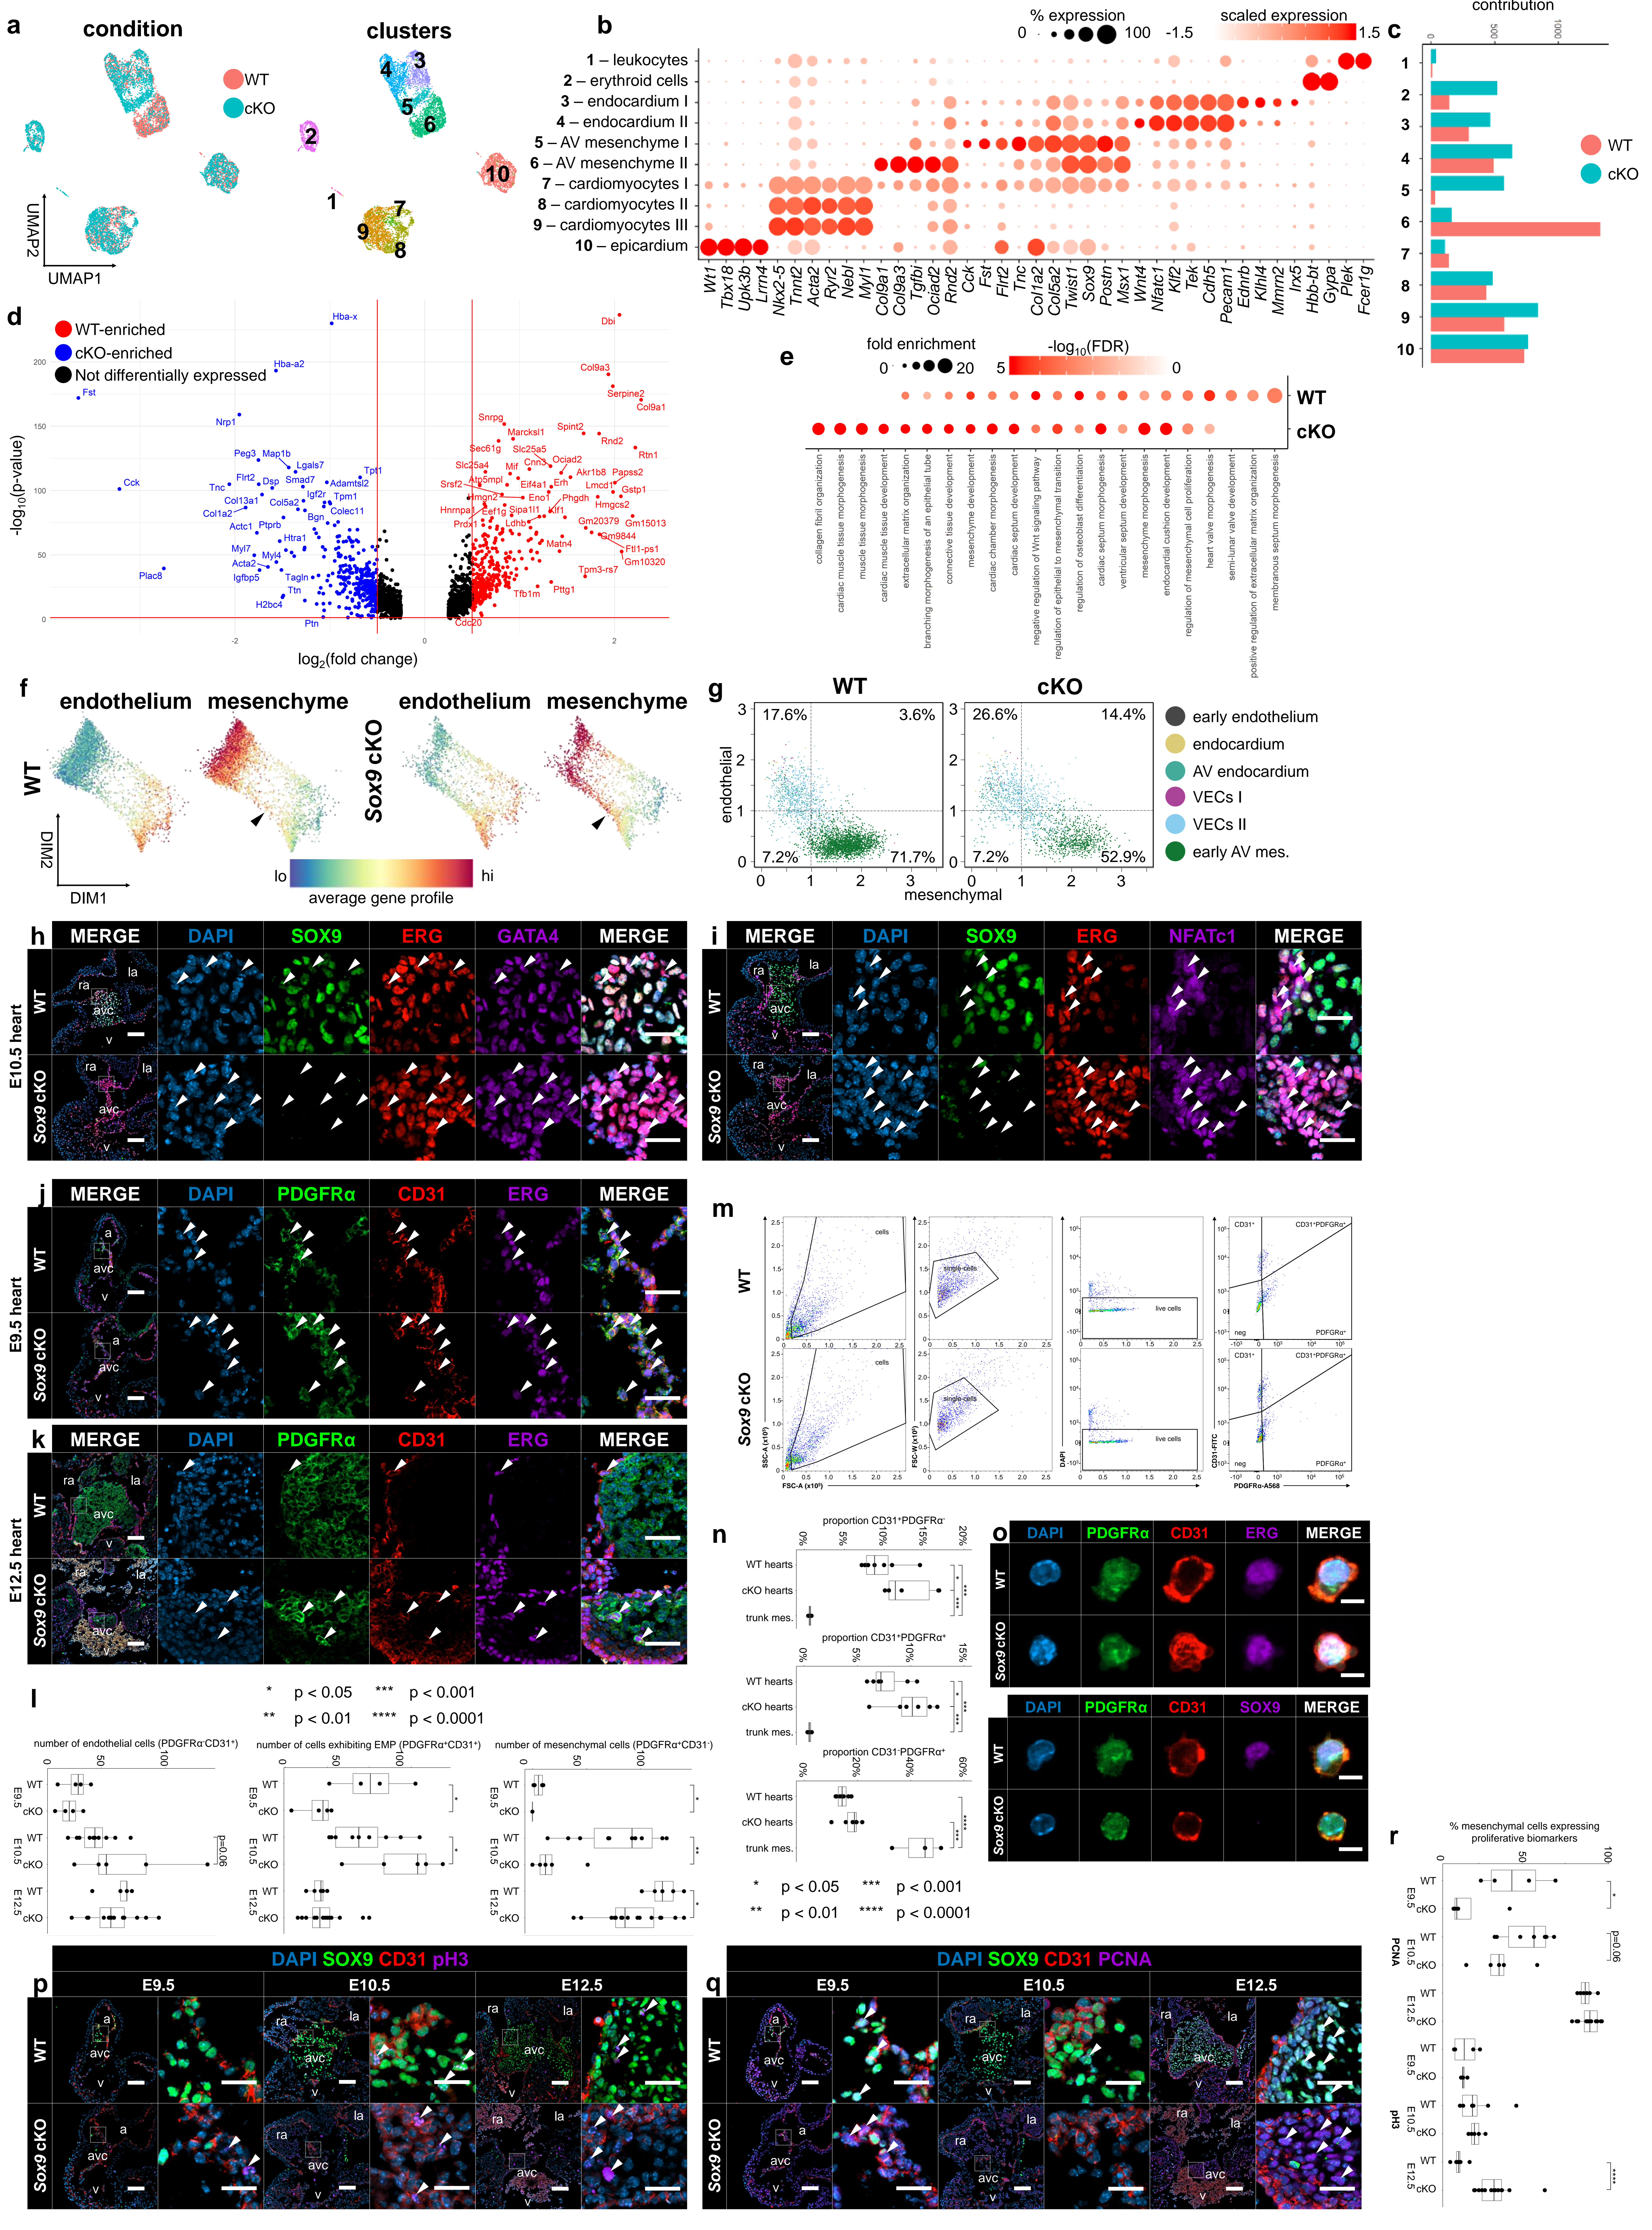

**Supplementary Figure 4.** Comparison of WT and Sox9 cKO atrioventricular single-cell libraries. Related to Fig. 4.

(a) UMAPs showing condition and cluster distribution of single-cell data generated from Sox9 conditional knockout (cKO) and WT littermate atrioventricular (AV) canals. (b) Dot plot displaying select genes enriched within identified clusters. Size of the dot represents proportion of the cluster that expresses each gene. Colour indicates level of expression. Note that Sox9 expression is retained in Sox9 cKO mesenchyme due to capture of 5'-end upstream of flox site. (c) Contribution of WT and Sox9 cKO single cells to each cluster identified at E10.5. (d) Volcano plots displaying differentially-expressed genes in AV mesenchyme in the WT and Sox9 cKO at E10.5. (e) Dot plot displaying shared and enriched gene ontology terms in WT and Sox9 cKO mesenchymal clusters at E10.5. Size of the dot represents fold enrichment of the gene ontology term. Colour indicates significance based on false discovery rate (FDR). (f) Force-directed layouts displaying endothelial and mesenchymal gene profiles for endothelial-derived lineages from E10.5 WT and Sox9 cKO libraries. Arrowheads indicate domains with increased mesenchymal gene profile expression in the Sox9 cKO. (g) Scatterplot displaying endothelial and mesenchymal gene profiles for endothelial-derived lineages from E10.5 WT and Sox9 cKO libraries, annotated by cluster. Immunostaining of AV canals at E10.5 for (h) SOX9, ERG, and GATA4 or (i) SOX9, ERG, and NFATc1 show increased distribution of GATA4+ and NFATc1+ endocardial, respectively (arrowheads). Immunostaining of AV canals for PDGFR $\alpha$ , CD31, and ERG at (j) E9.5 and (k) E12.5 reveal endocardial cells exhibiting mesenchymal features. (l) Quantifications of PDGFR $\alpha$  and CD31 immunostaining from Fig. 4f and Supplementary Fig. 4j-k, showing numbers of endocardial, mesenchymal, and hybrid (EMP) cells in WT and Sox9 cKO AVCs from E9.5, E10.5, and E12.5 (two-tailed unpaired t-test). (m) Fluorescent-activated cell sorting (FACS) of WT and Sox9 cKO whole, individual hearts with outflow tracts removed, showing (n) increased proportions of CD31+PDGFR $\alpha$ - endothelial cells and CD31+PDGFR $\alpha$ + within the Sox9 cKO. E10.5 pharyngeal trunk mesenchyme (mes.) was used as positive PDGFR $\alpha$  control (two-tailed unpaired t-test). (o) Sorted CD31+PDGFR $\alpha$ + single-cells show co-expression of endothelial and mesenchymal biomarkers. Note absence of SOX9 in a sorted CD31+PDGFR $\alpha$ + single-cell from Sox9 cKO. Immunostaining of proliferative markers, including (p) phospho-histone H3 (pH3) and (q) PCNA, along with markers of mesenchymal (SOX9) and endothelial (CD31) identity in WT and Sox9 cKO AVCs from E9.5, E10.5, and E12.5. (r) Proportions of proliferating mesenchymal cells in WT and Sox9 cKO AVCs at E9.5, E10.5, and E12.5 (two-tailed unpaired t-test). All quantifications were performed on sections from  $n \geq 3$  hearts. For box plots, the centre line represents the median value, where the bounds of the box span the interquartile range and whiskers represent minimum and maximum values, excluding outliers. Immunostaining results validated in  $n \geq 3$  independent experiments. Scale bars, 100 $\mu$ m, 25 $\mu$ m in ROIs, 10 $\mu$ m for sorted single-cells. AV, atrioventricular; VECs, valve endocardial cells. Source Data are provided as a Source Data file.

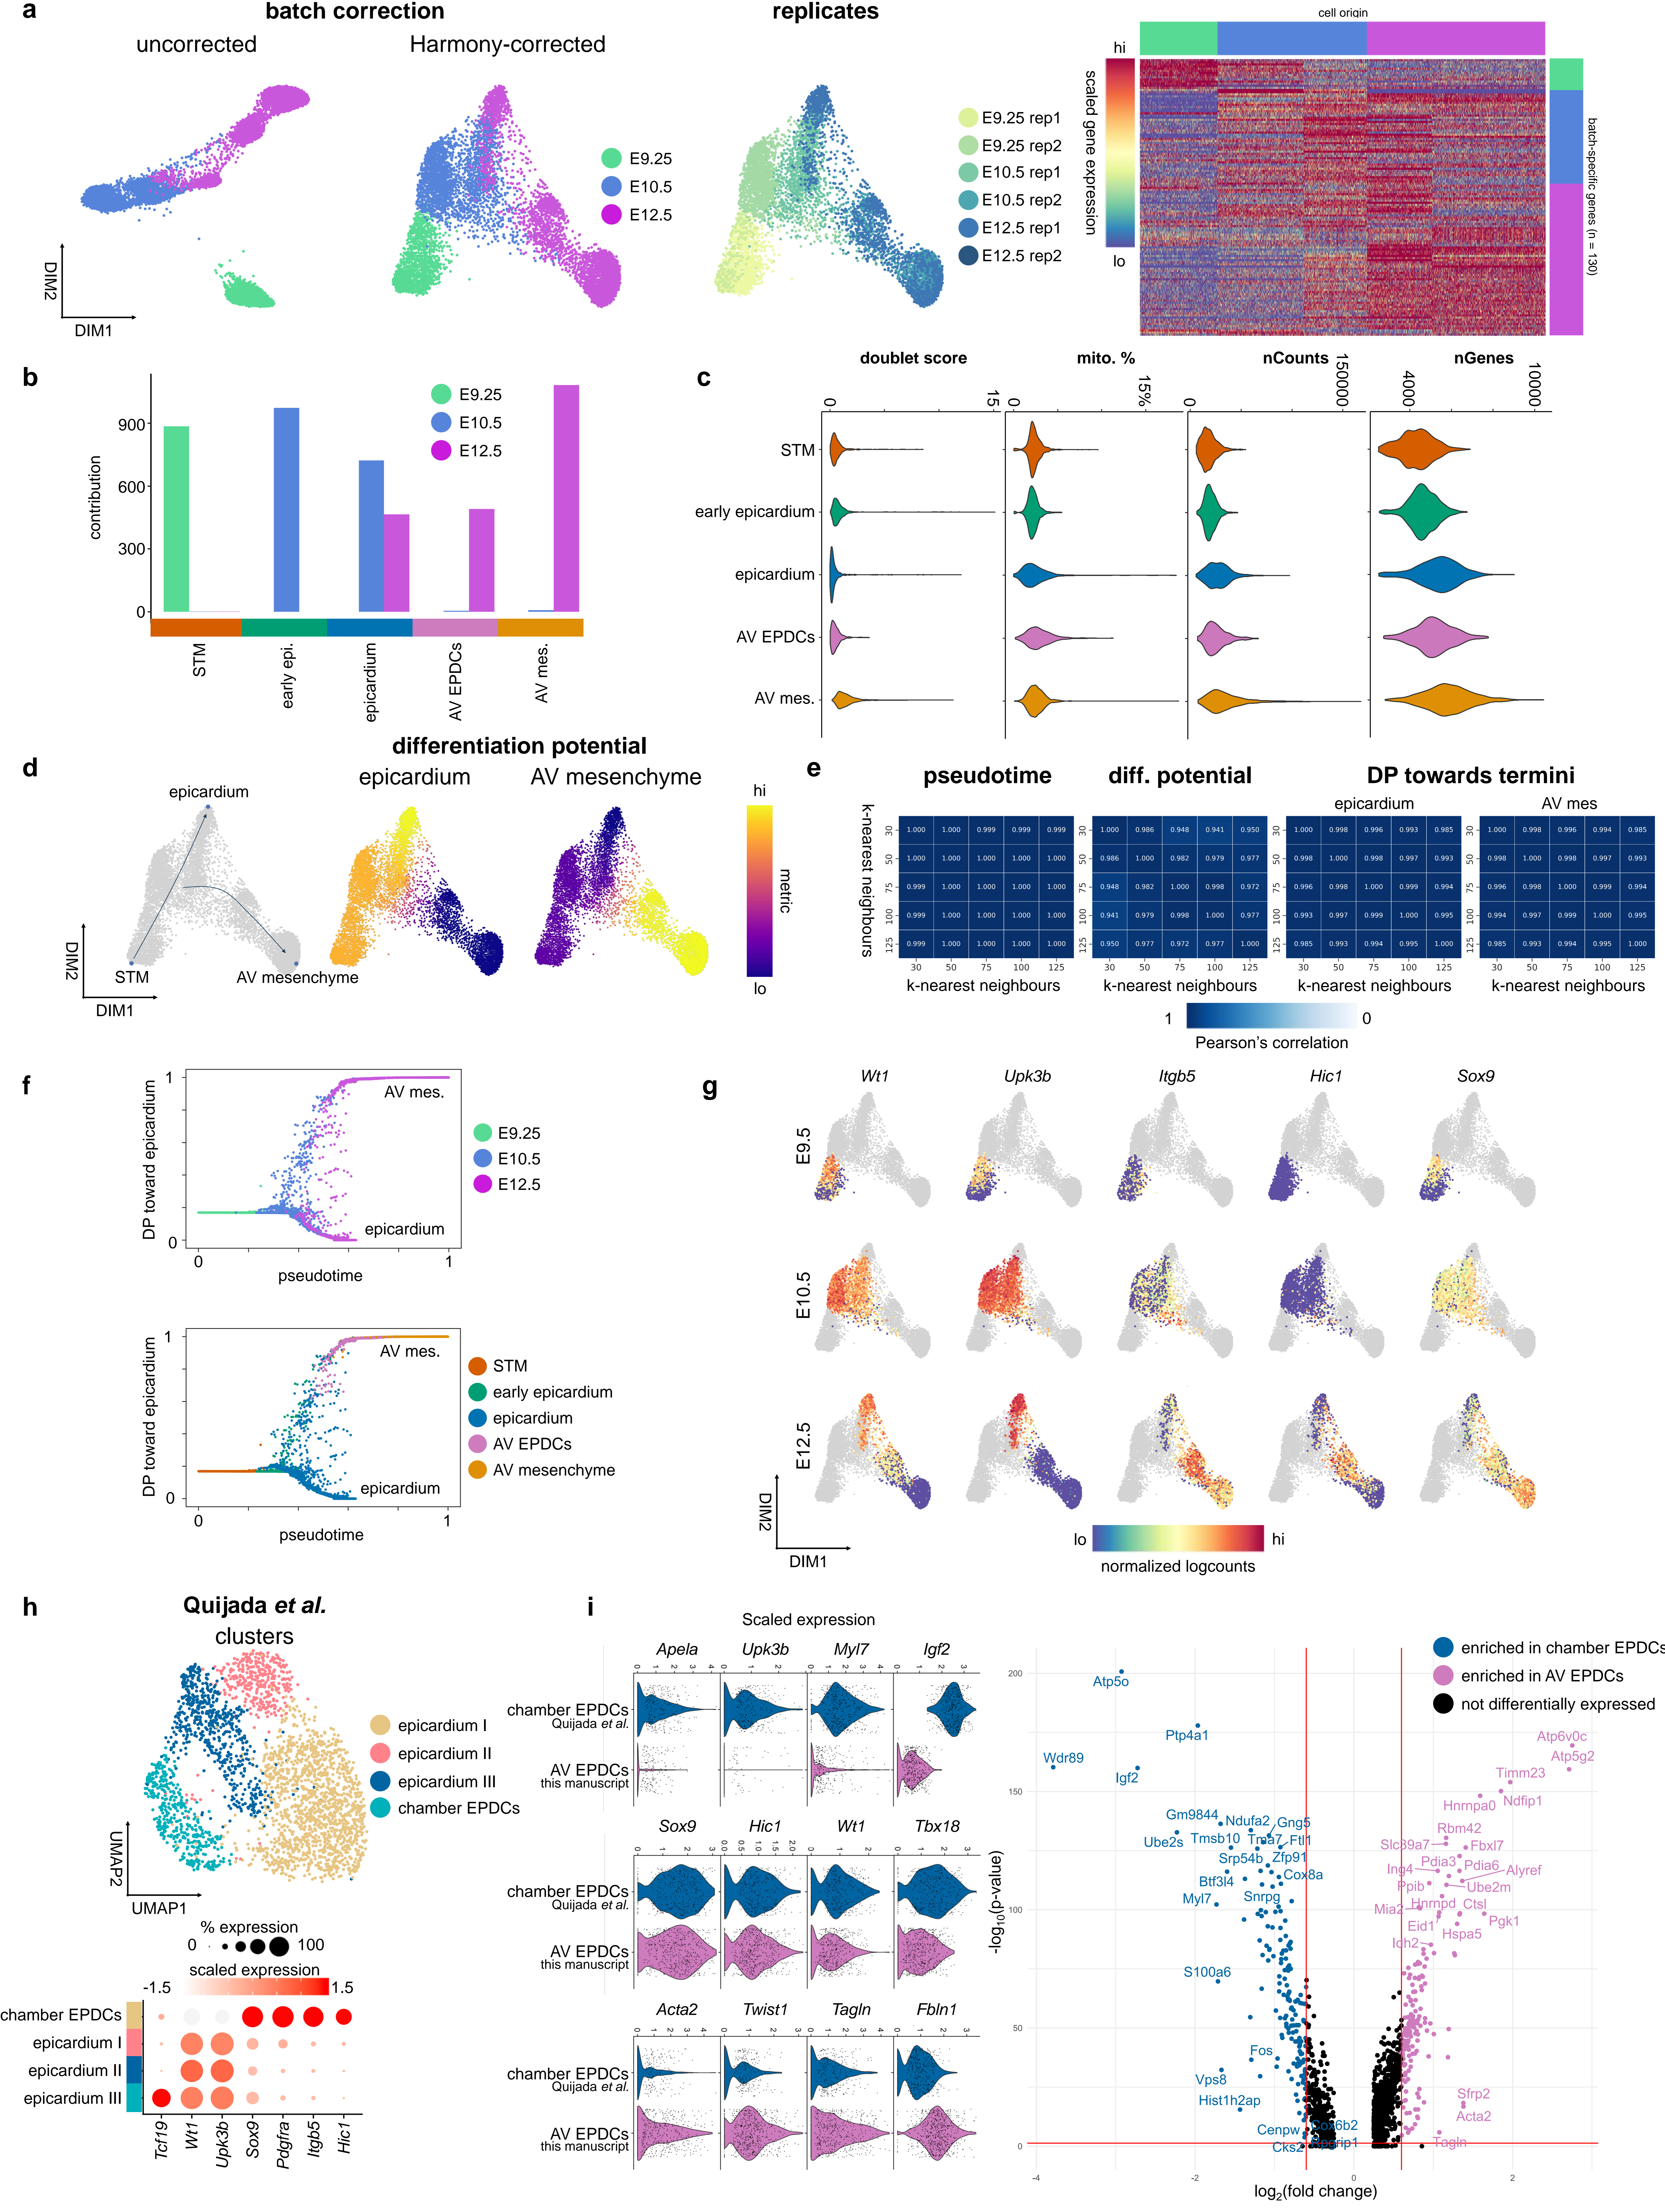



**Supplementary Figure 5.** Characterization of epicardial diversity and differentiation during the epicardial-to-mesenchymal transition. Related to Fig. 5.

(a) Force-directed layouts and a heatmap showing timepoint distribution before and after Harmony correction as well as replicate distribution and batch-associated genes in epicardial lineages. (b) Timepoint contribution to each cluster identified in epicardial lineages. (c) Violin plots displaying doublet score, mitochondrial percent, nCounts, and nGenes for each cluster identified in epicardial lineages. (d) Force-directed layouts showing termini and rough trajectory for Palantir analysis and differentiation potential toward atrioventricular (AV) mesenchymal, and epicardial termini in epicardial lineages. (e) Palantir results are robust when varying nearest neighbor input, k. Plots show Pearson's correlation for pseudotime, differentiation (diff.) potential, and branch probability between pairs of Palantir runs. (f) Differentiation potential as a function of pseudotime for epicardial lineages progressing toward an epicardial terminus. Each dot represents a single-cell that is colour-coded by embryonic timepoint or cluster. (g) Expression of select epicardial and mesenchymal biomarkers, showing the precocious expression of *Itgb5* and *Hic1* by E10.5, suggesting early emergence of AV epicardial-derived cells (EPDCs). (h) Analysis of single-cell transcriptomic data of epicardial cells from Quijada *et al.* (2021) also reveals the presence of a distinct *Hic1*-expressing EPDC population. (i) Comparison of chamber EPDCs (from Quijada *et al.*) and AV EPDCs (from this manuscript) reveals transcriptional differences between these populations related to cell identity. epi., epicardium; mes., mesenchyme; STM, septum transversum mesenchyme. Source Data are provided as a Source Data file.

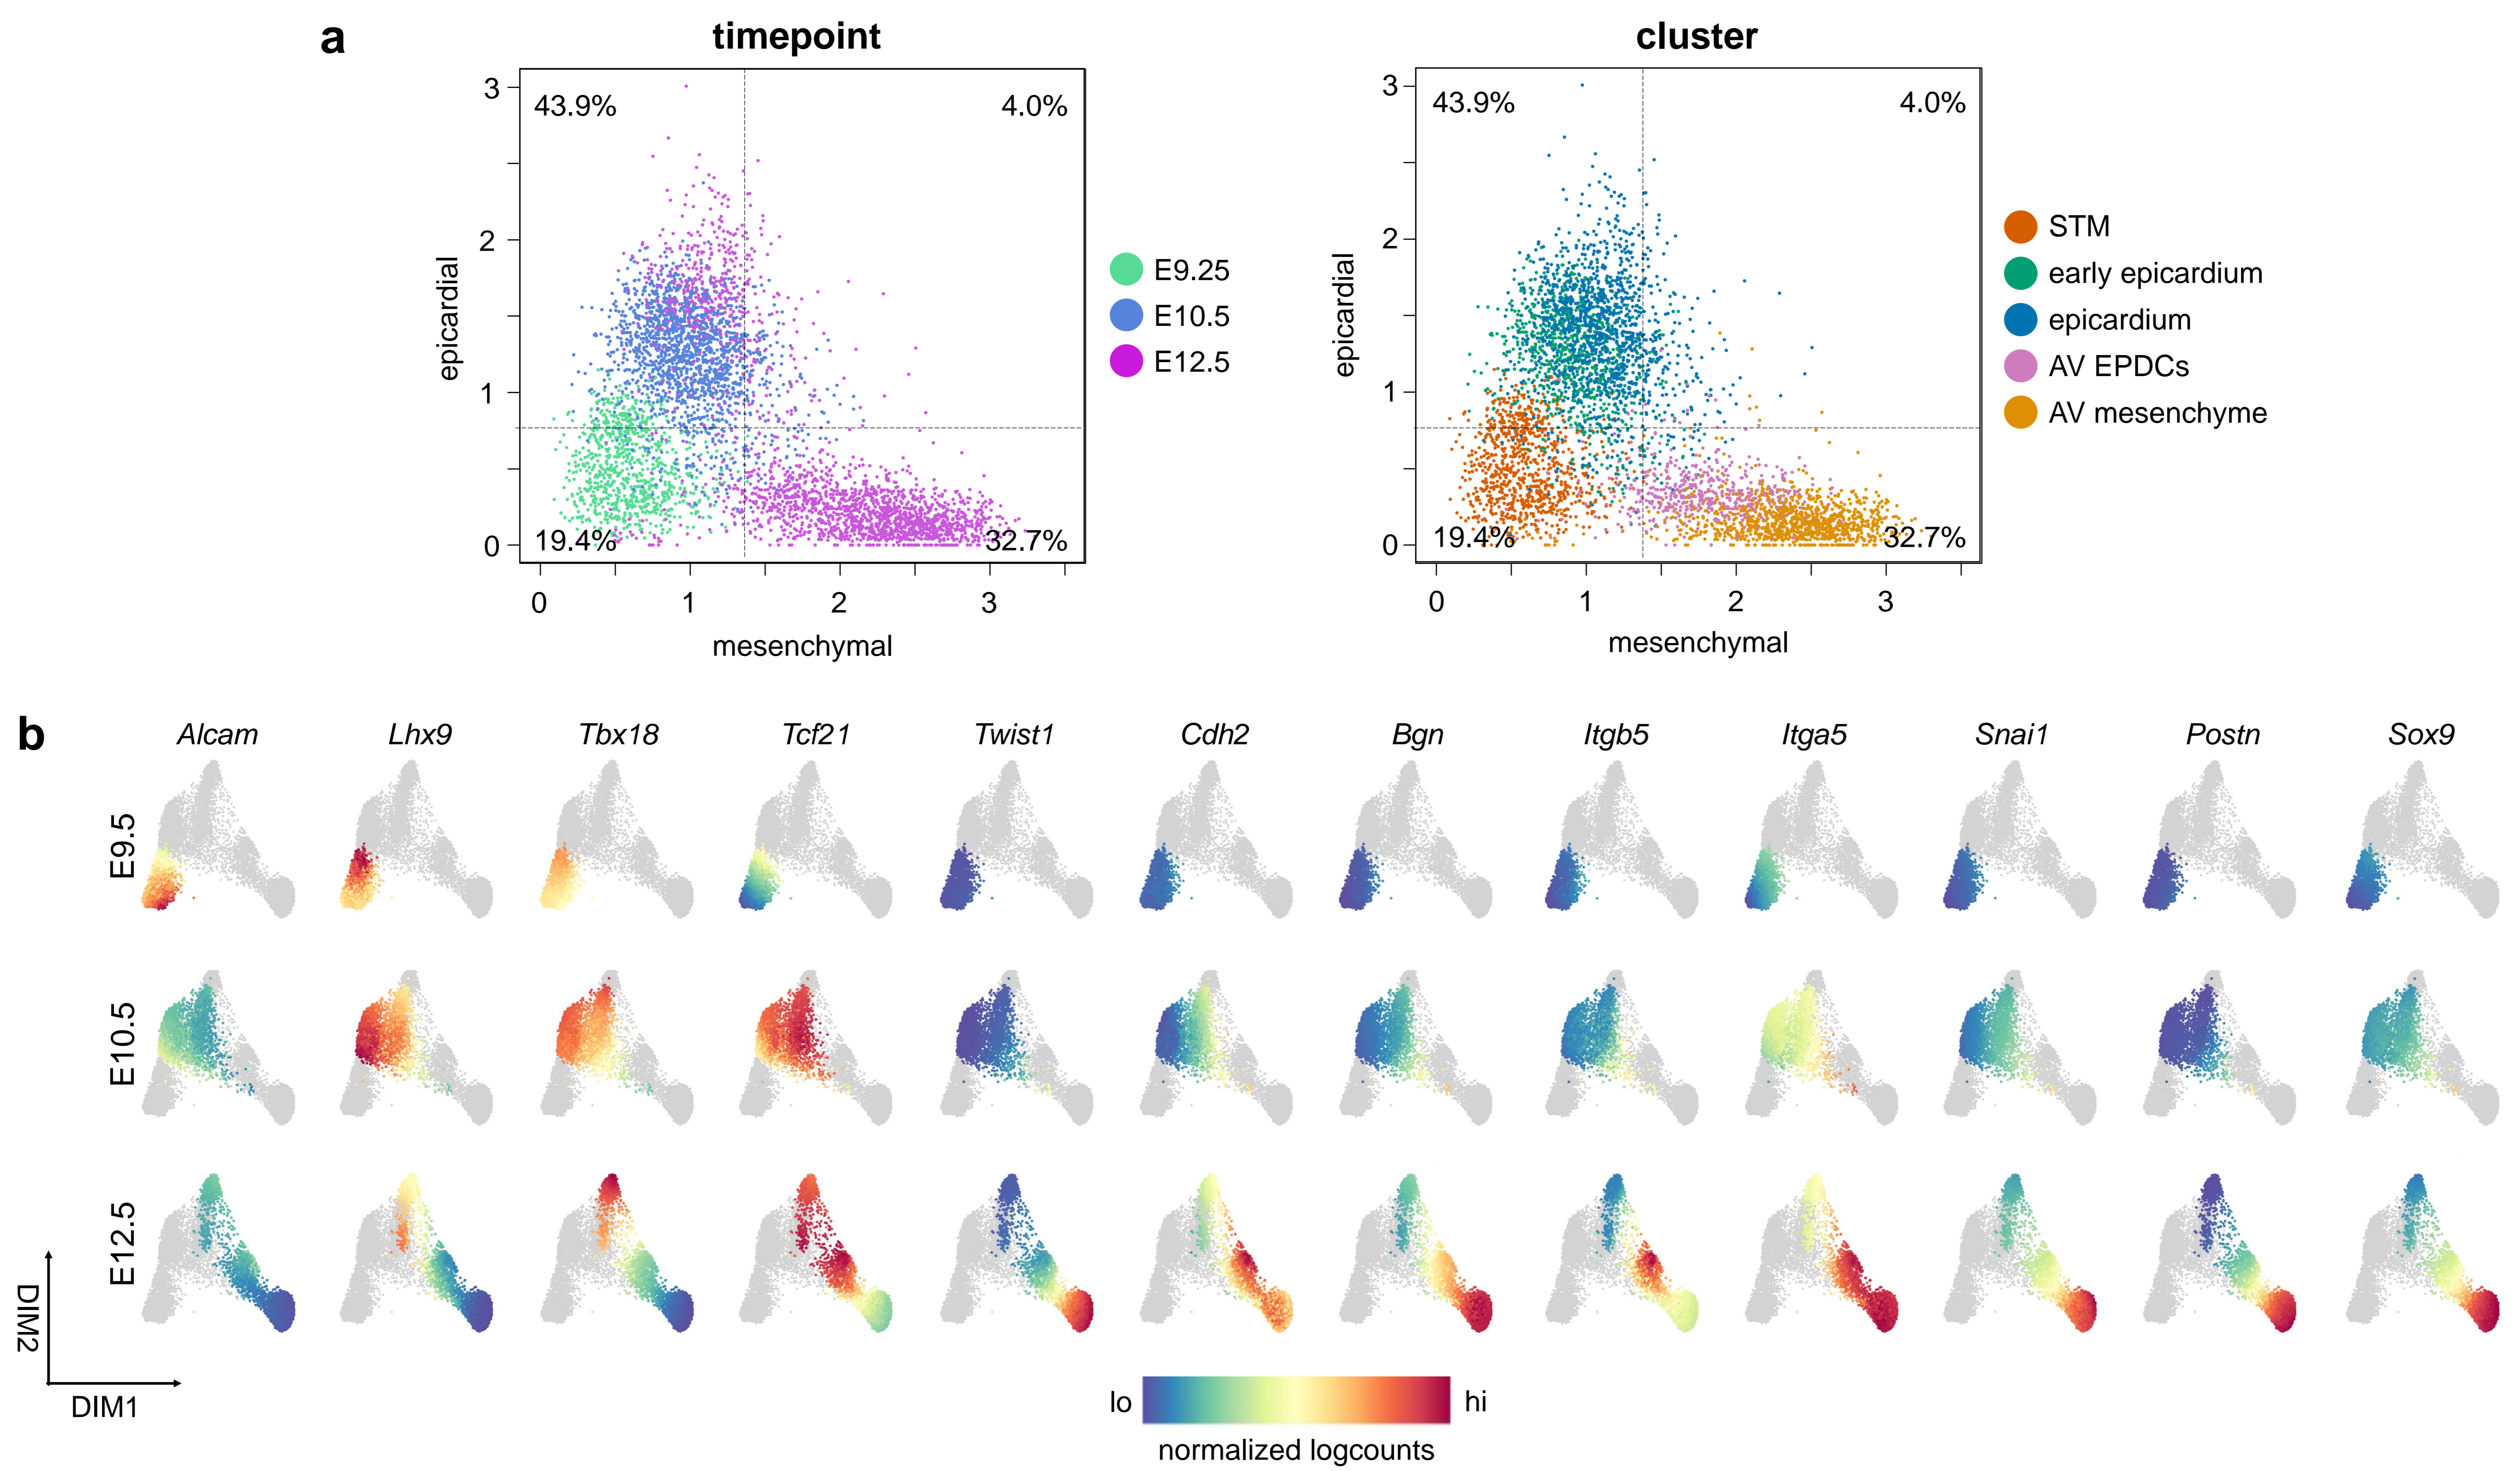

**Supplementary Figure 6.** Epicardial-to-mesenchymal plasticity during the epicardial-to-mesenchymal transition. Related to Fig. 6.

(a) Scatterplot comparing the epicardial and mesenchymal gene profiles either by timepoint or cluster. (b) Expression of select epicardial and mesenchymal biomarkers, showing shared expression of several mesenchymal factors between AV epicardial-derived cells (EPDCs) and mesenchymal cells at E12.5. SOX9, CD31, and WT1 staining on X-gal stained *Hic1<sup>nLacZ/+</sup>* hearts at (c) E12.5 and (d) E14.5. White and black arrowheads denote domains of low WT1 expression and high *Hic1<sup>nLacZ</sup>*. Yellow arrowheads denote epithelial epicardial cells that express high WT1 and low *Hic1<sup>nLacZ</sup>*. Immunostaining results validated in  $n \geq 3$  independent experiments. Scale bars, 100 $\mu$ m, 25 $\mu$ m in ROIs. epi., epicardium; mes., mesenchyme; STM, septum transversum mesenchyme.

**a** signaling during EndMT (E10.5)

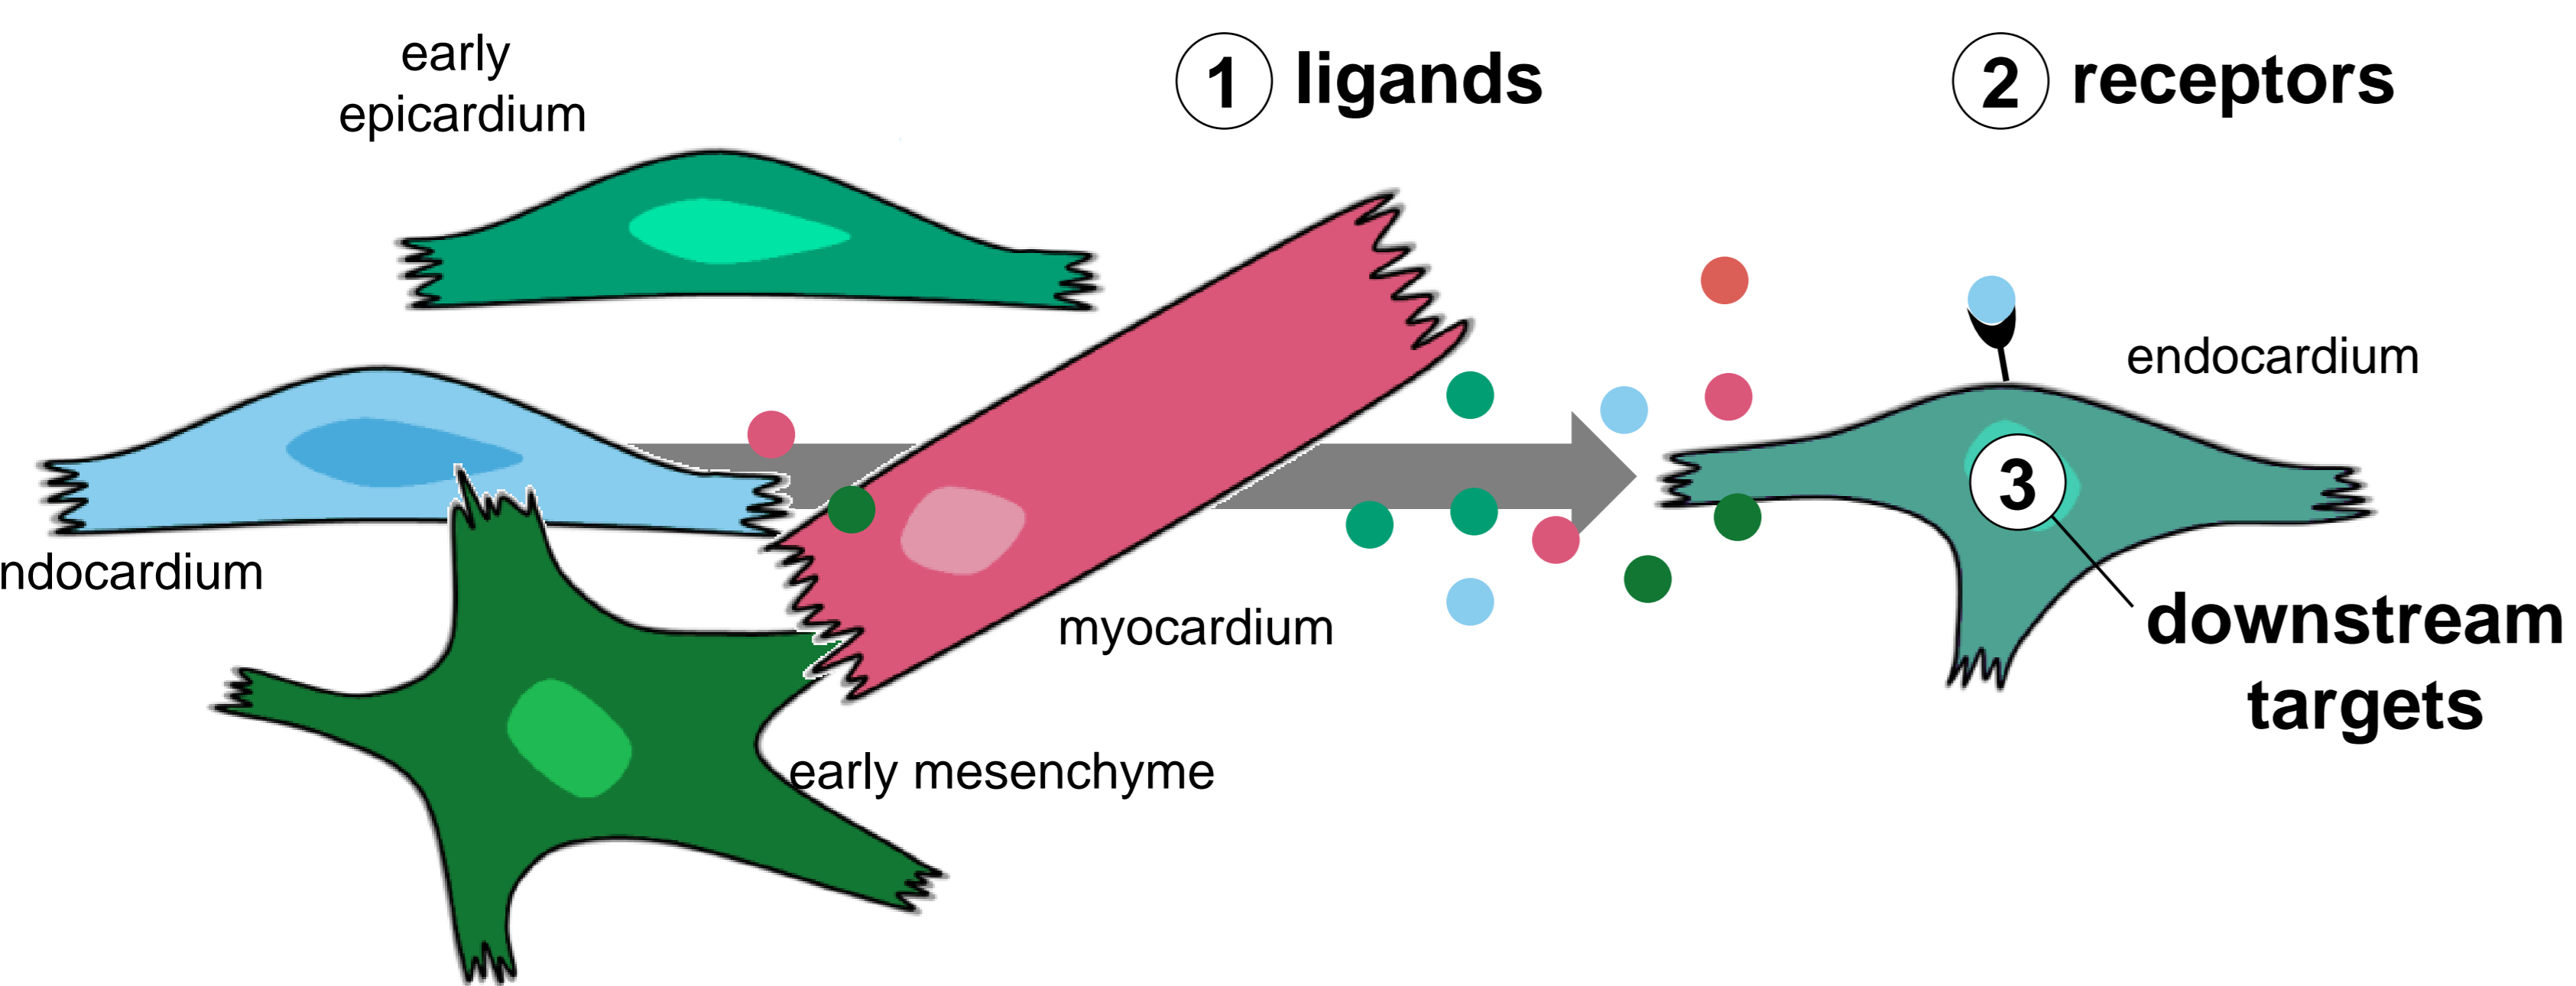

**b** Genes activated during EndMT

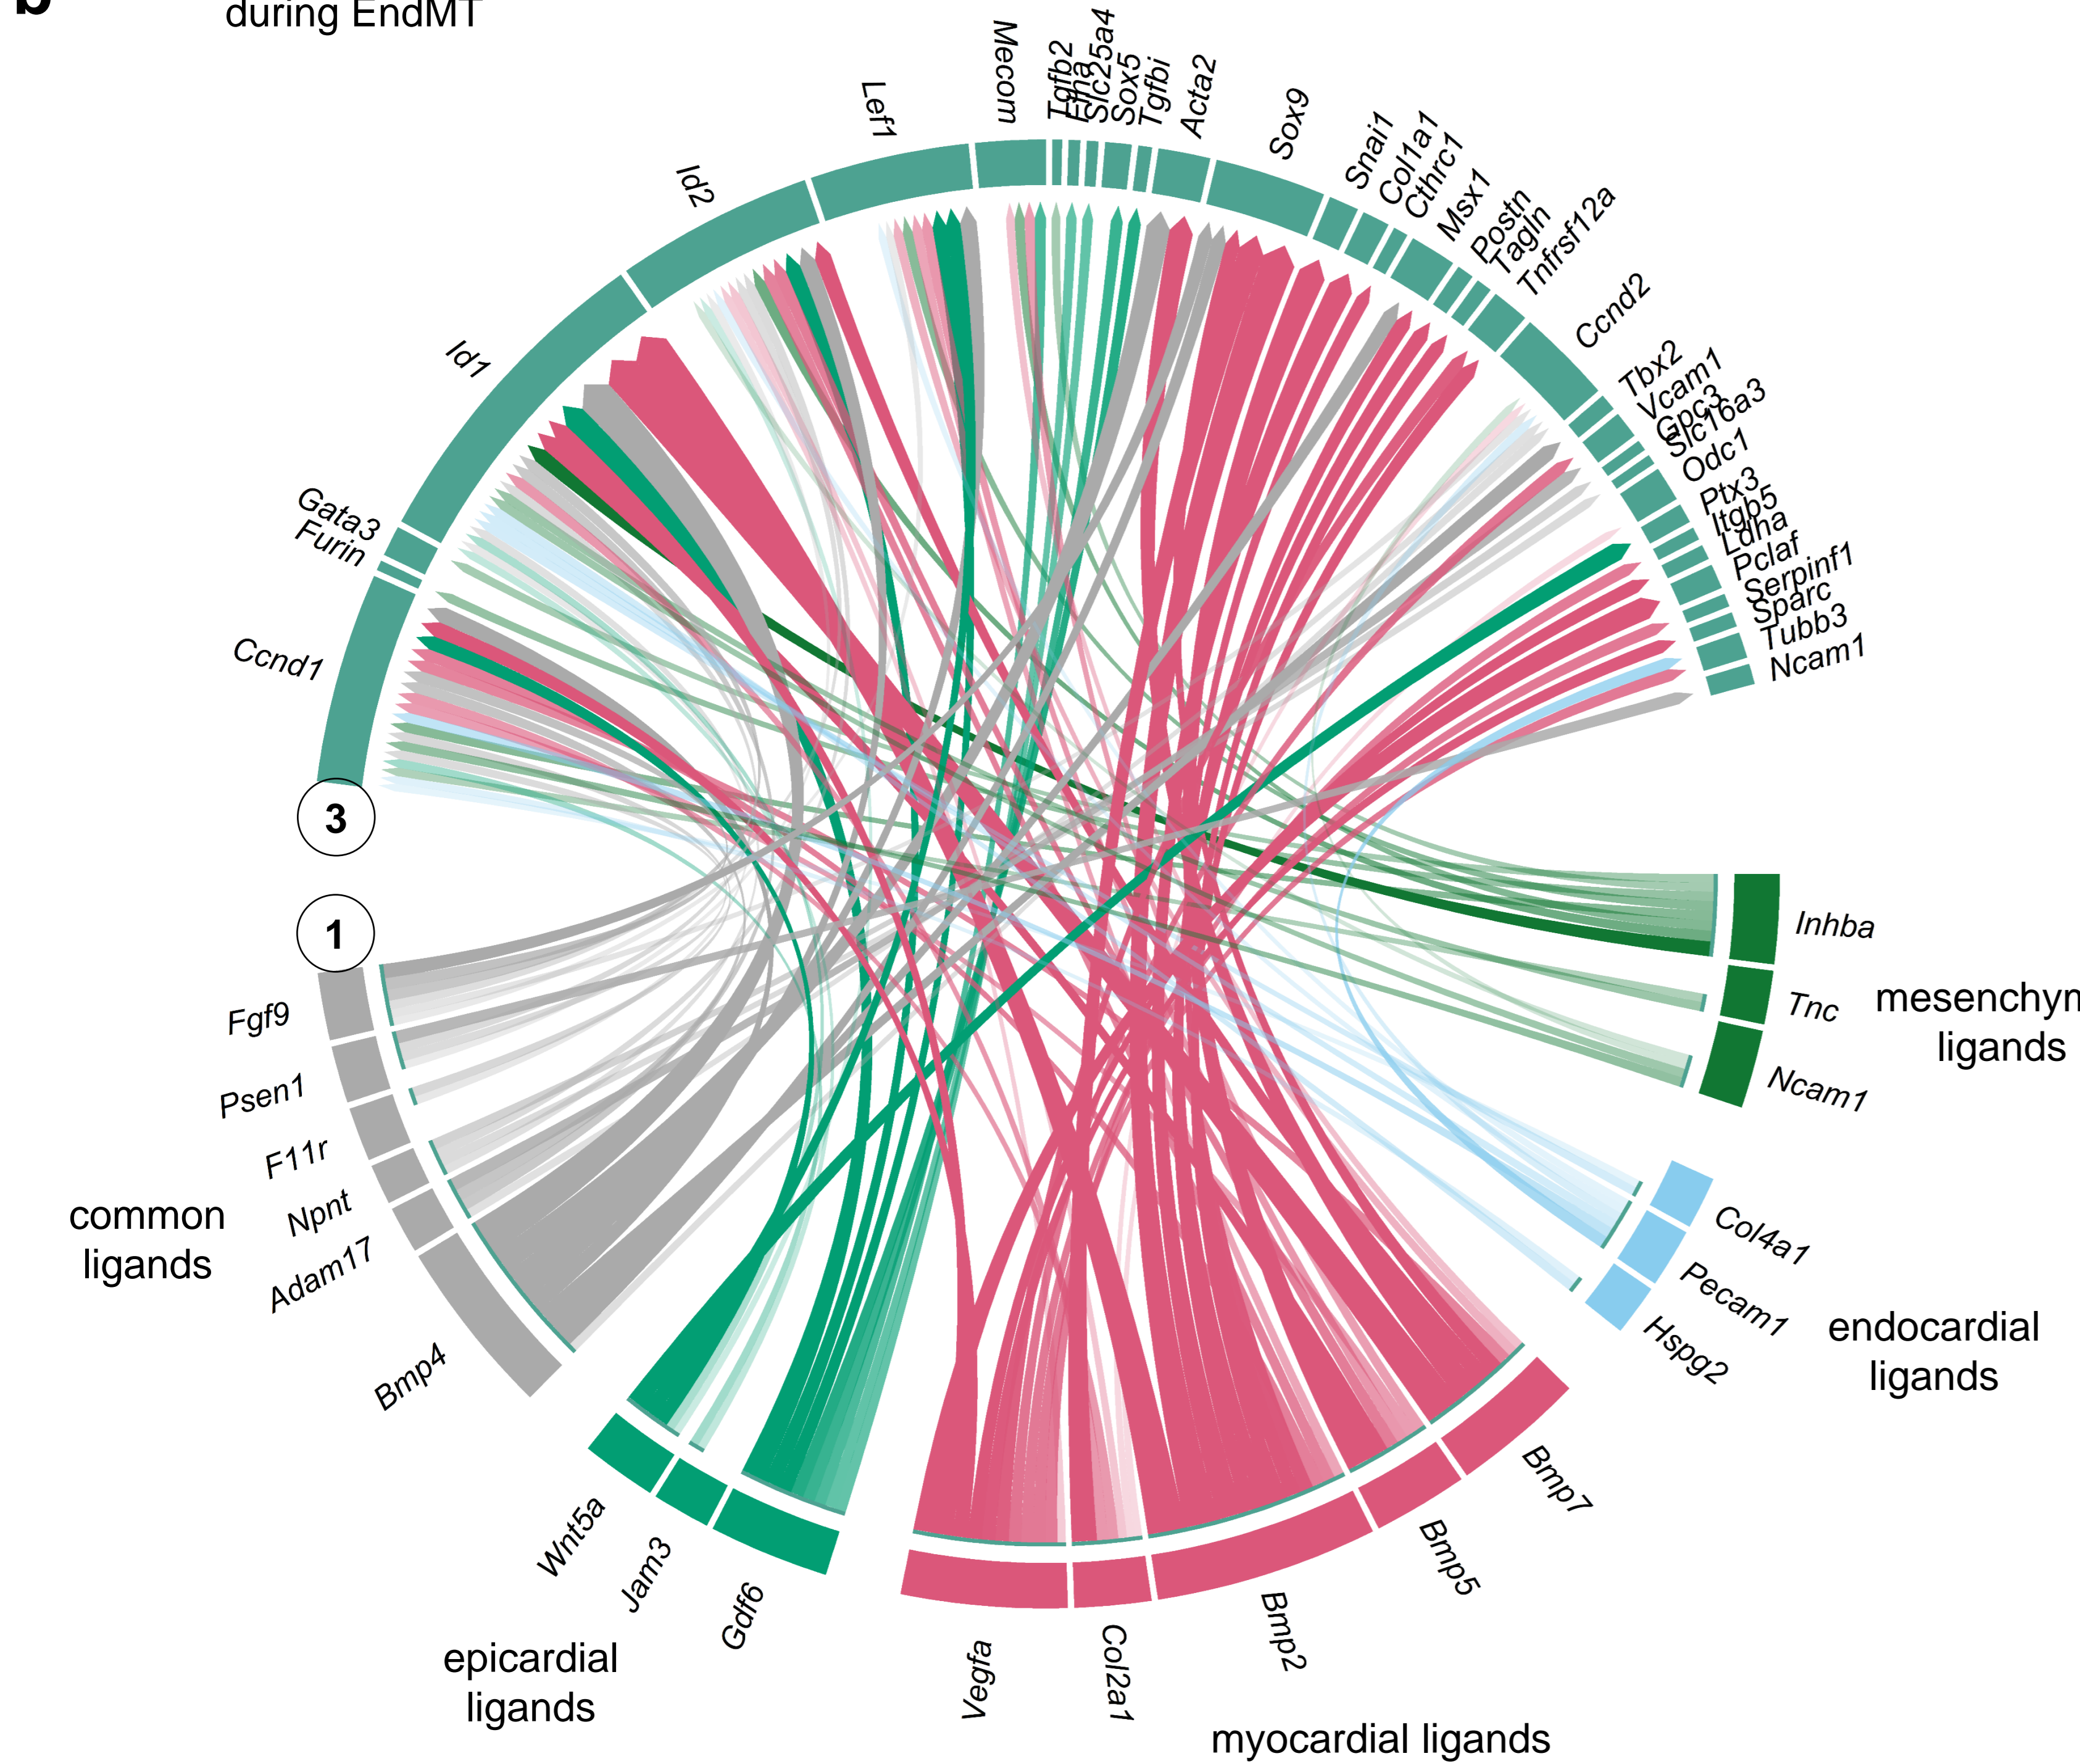

**c** signaling during EpiMT (E12.5)

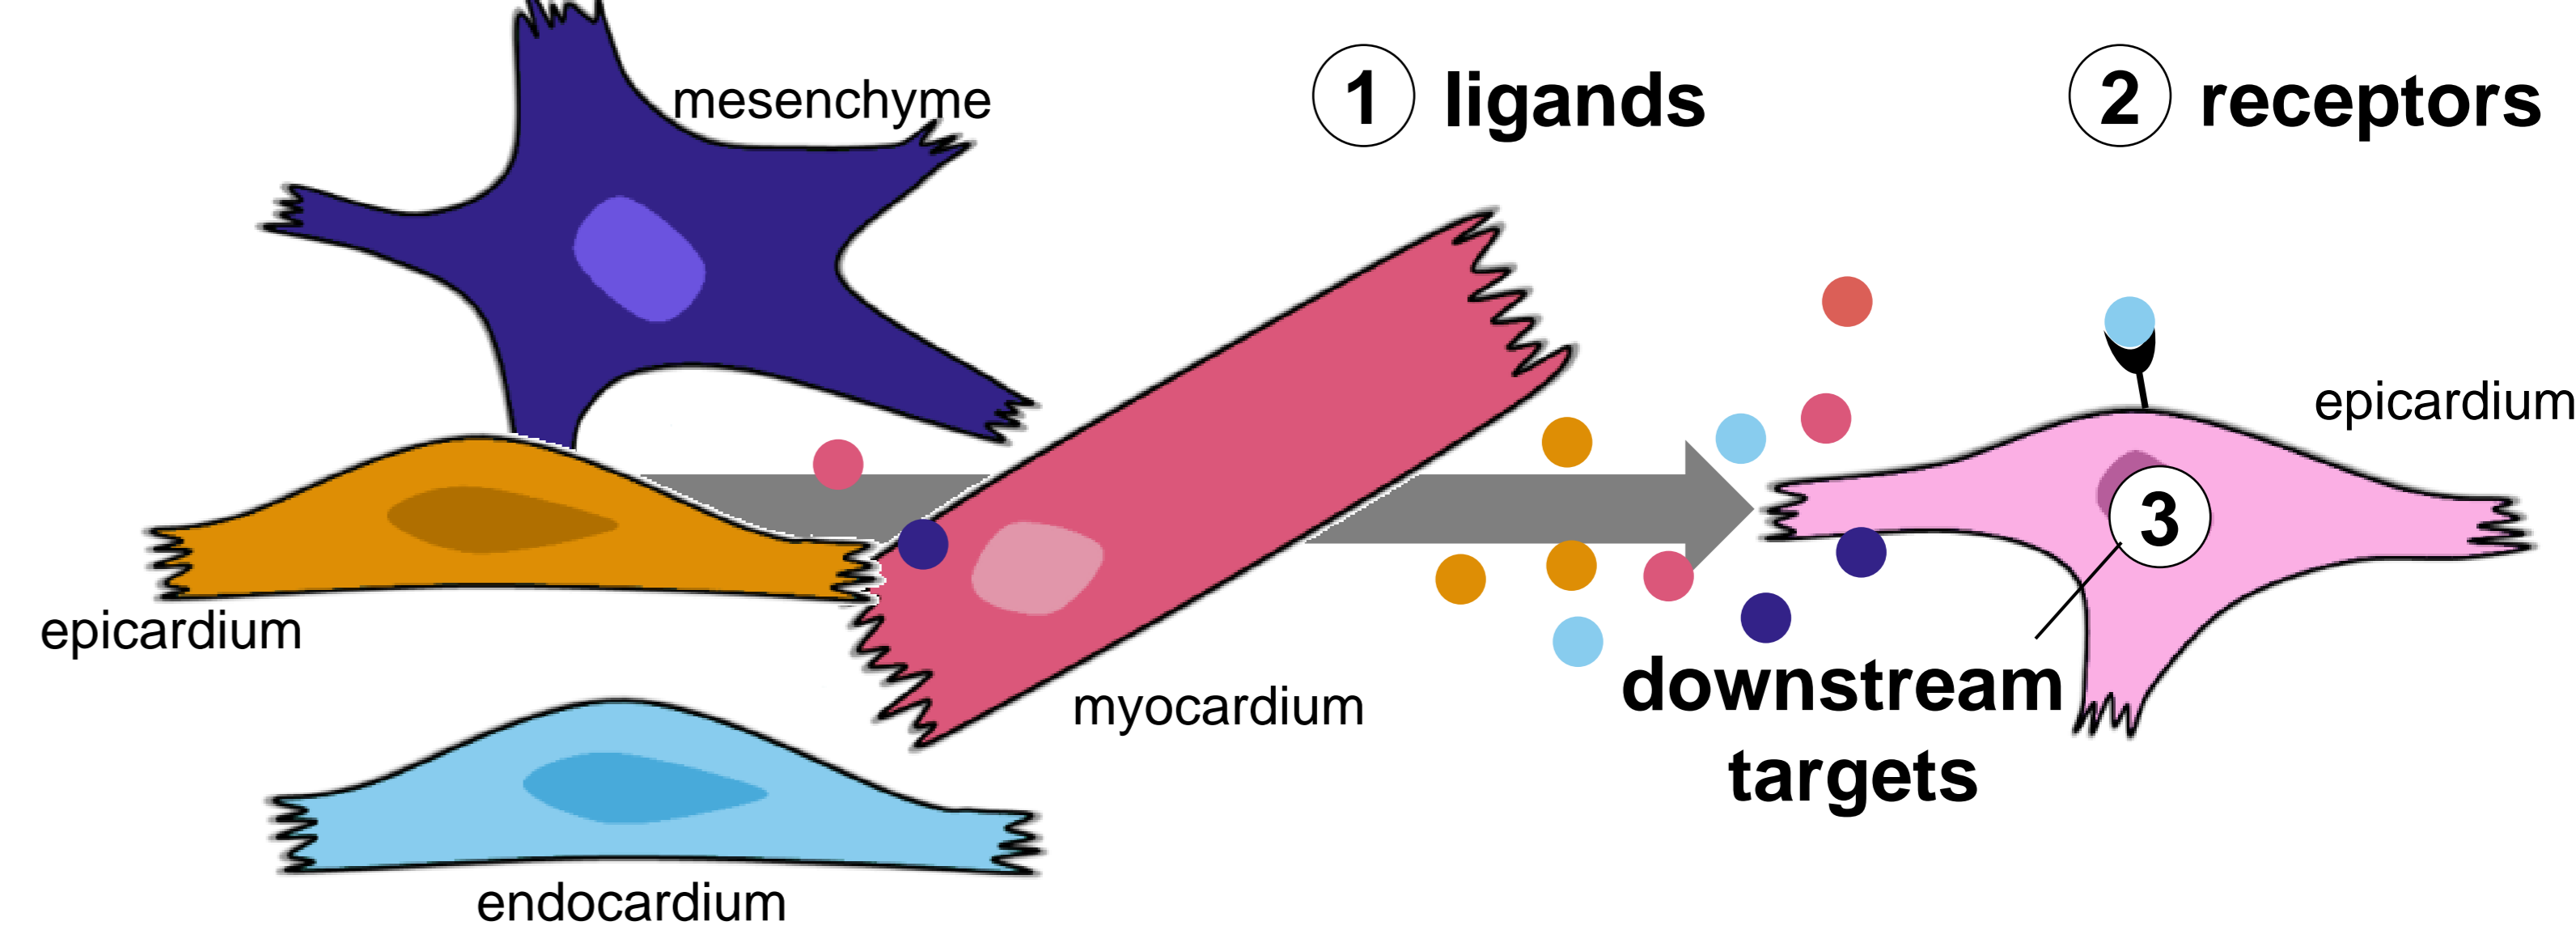

**d** Genes activated during EpiMT

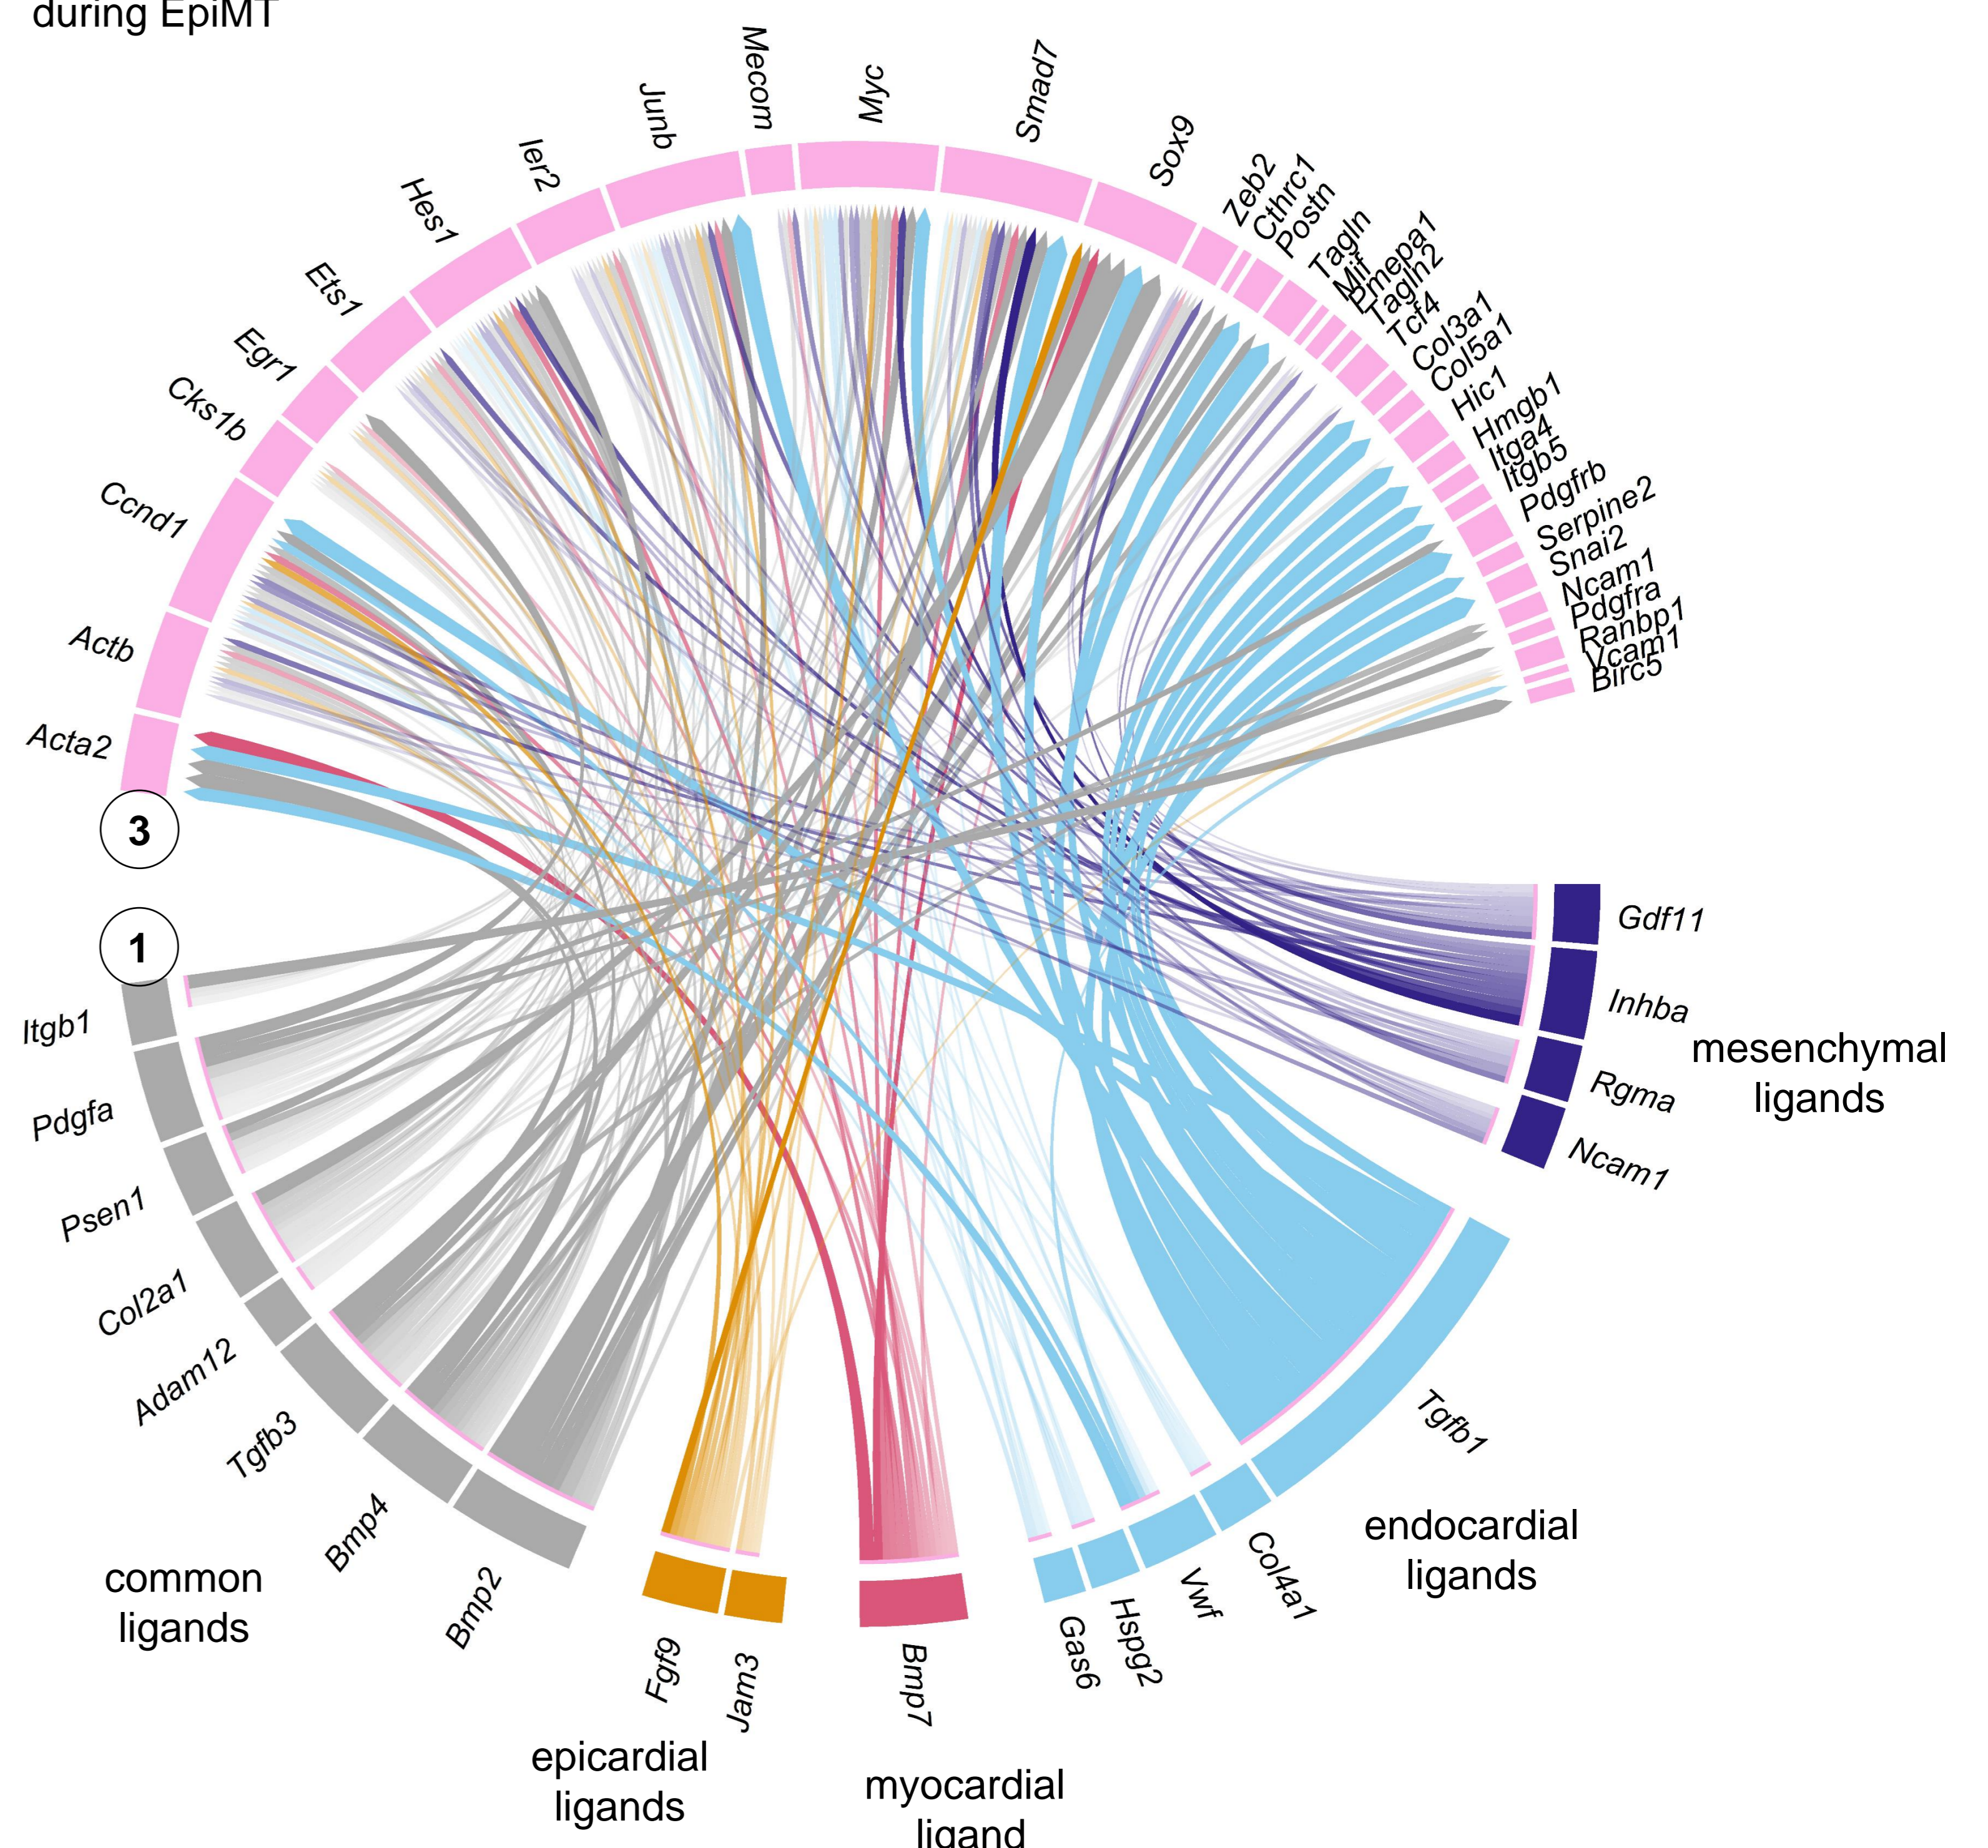

**e** signaling promoting AV mesenchyme proliferation (E12.5)

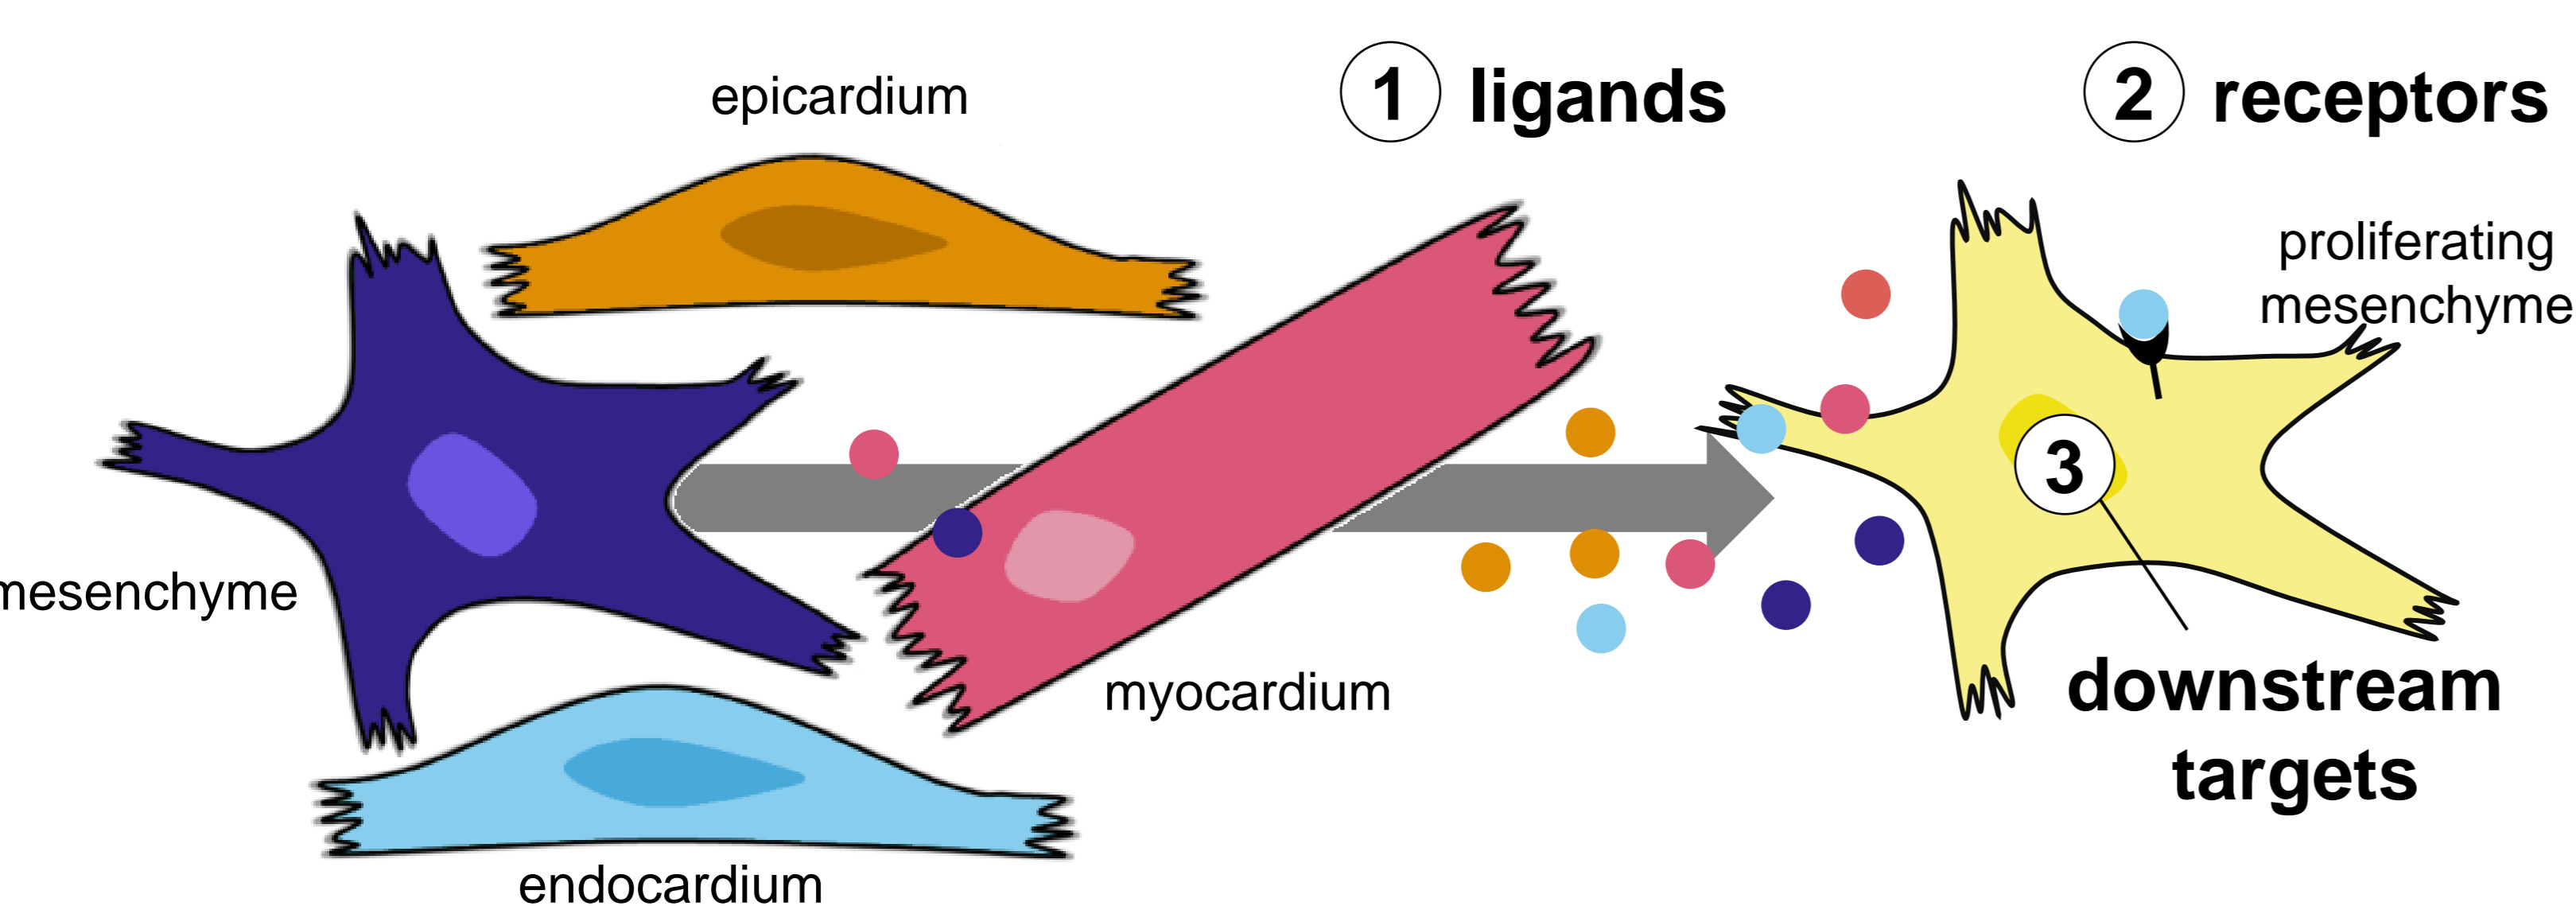

**f** Genes activated during AV mesenchyme proliferation

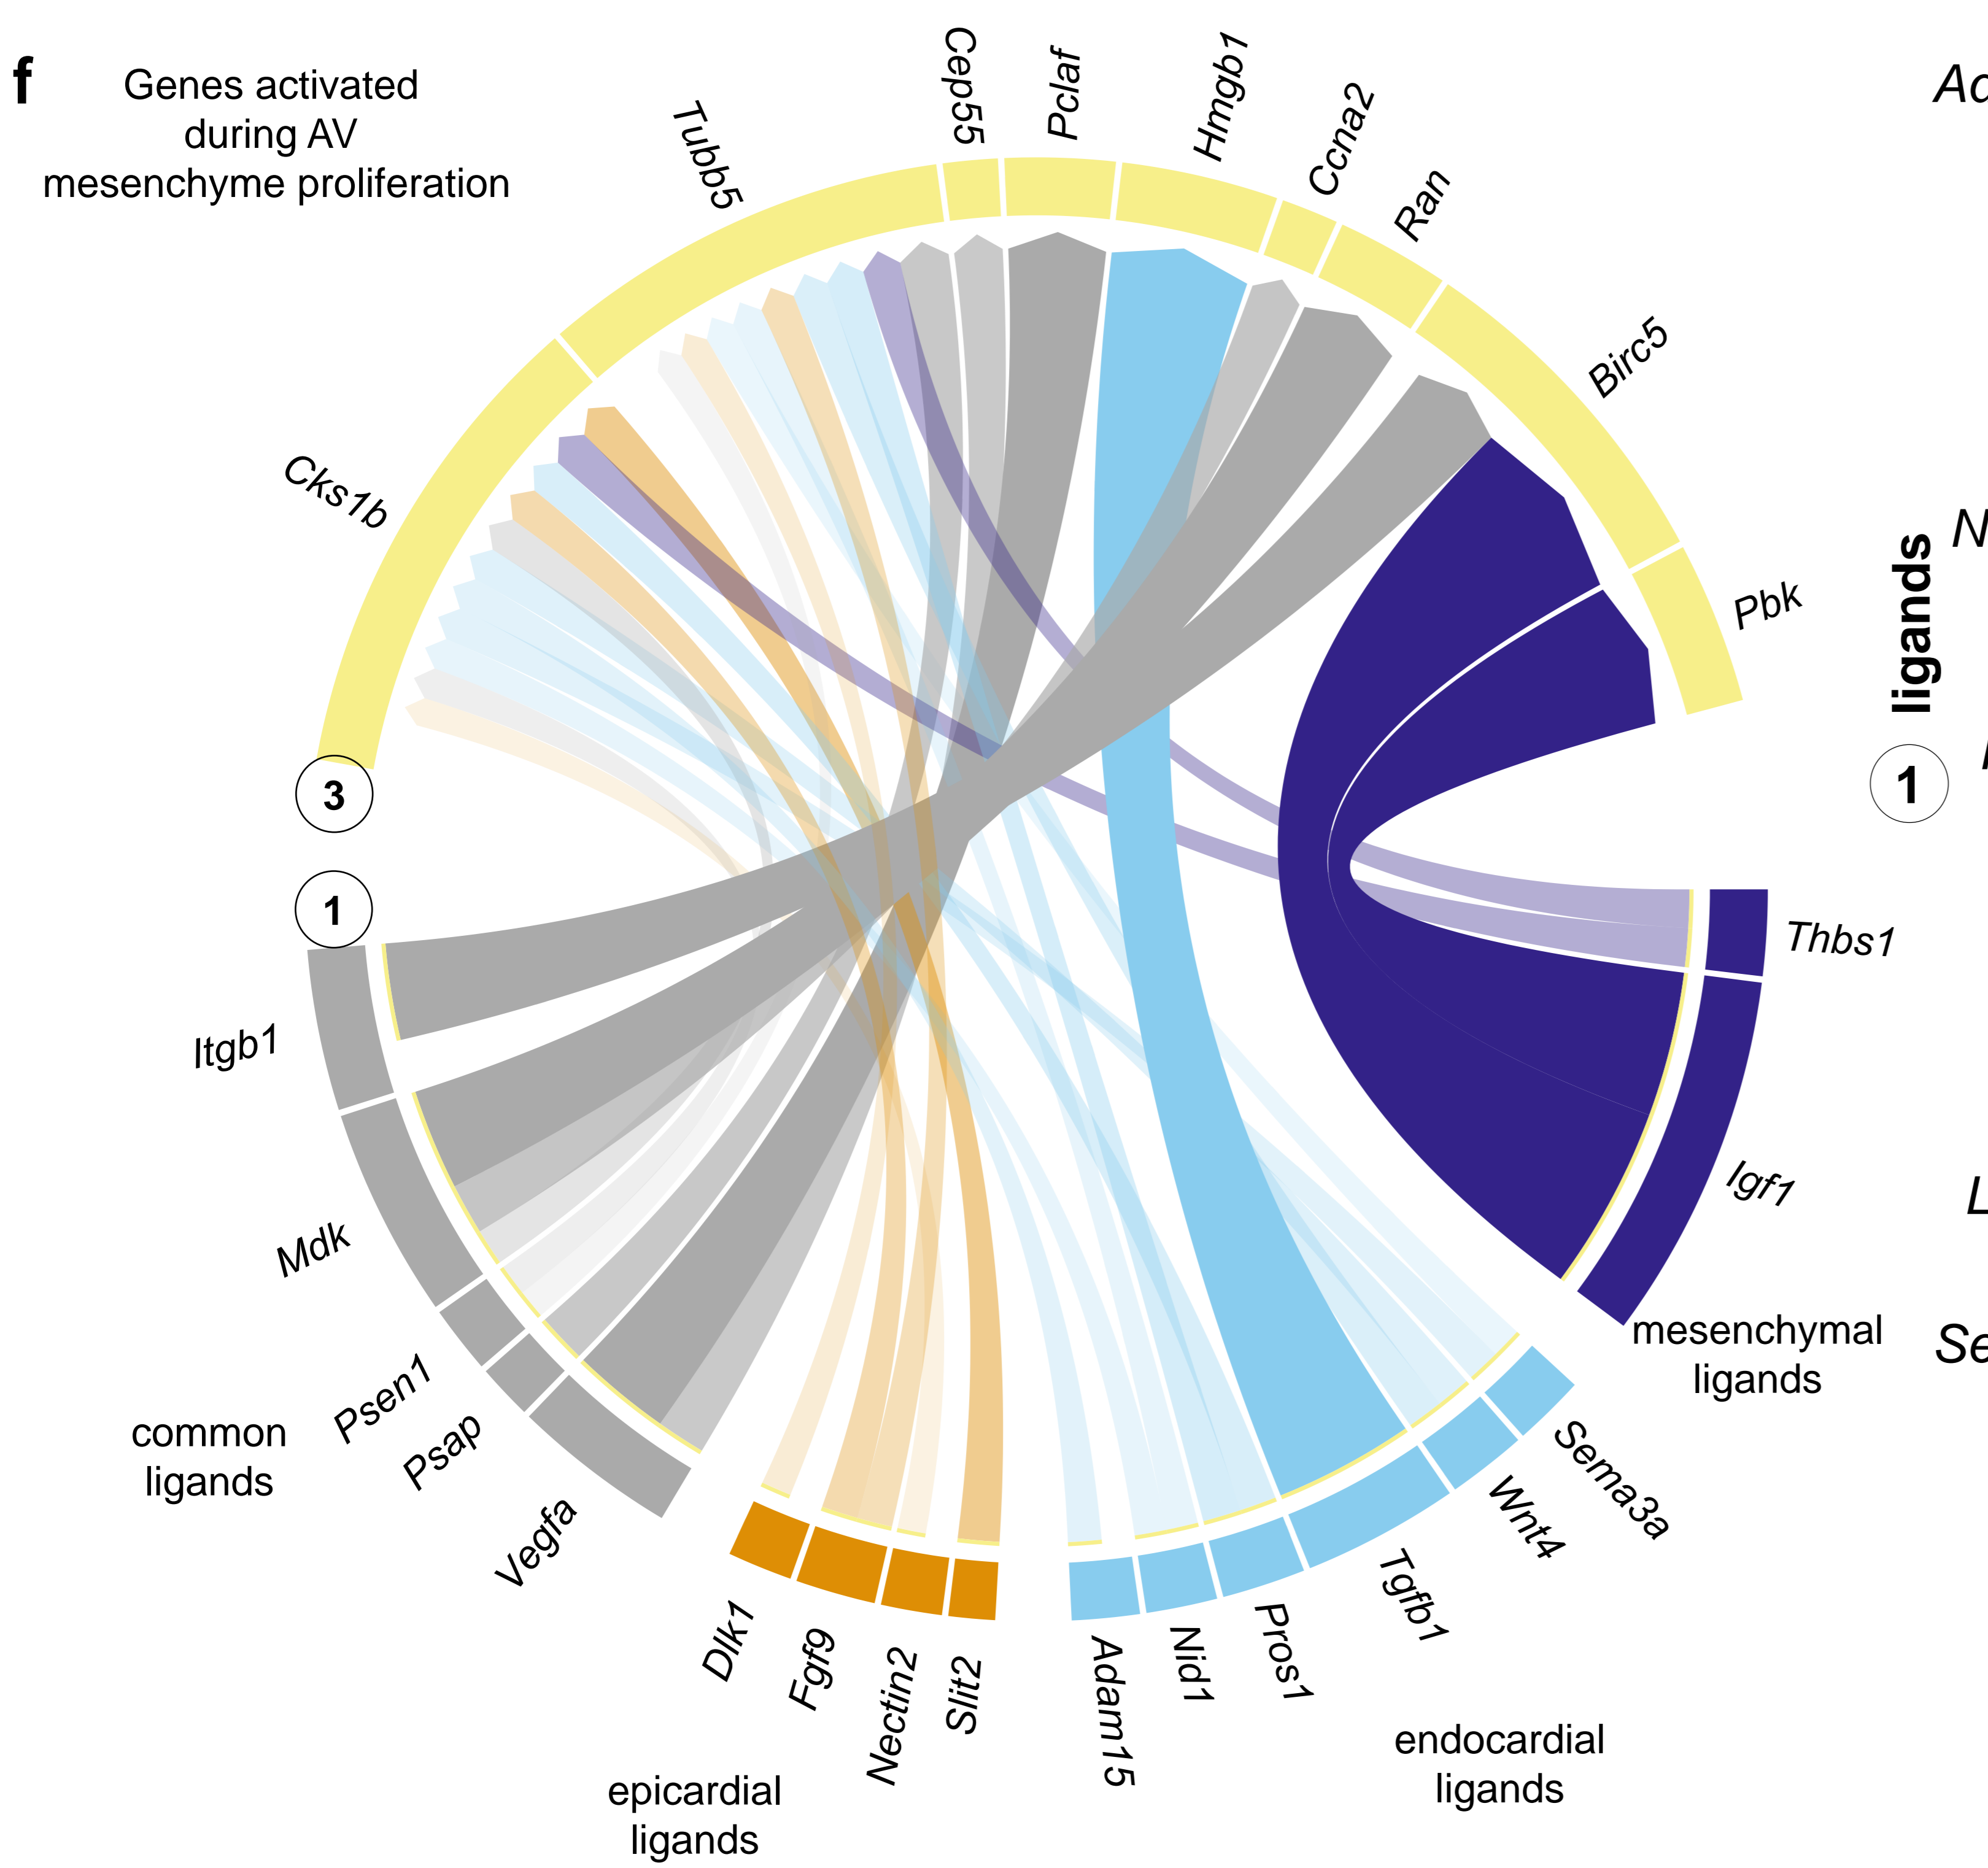

**g**

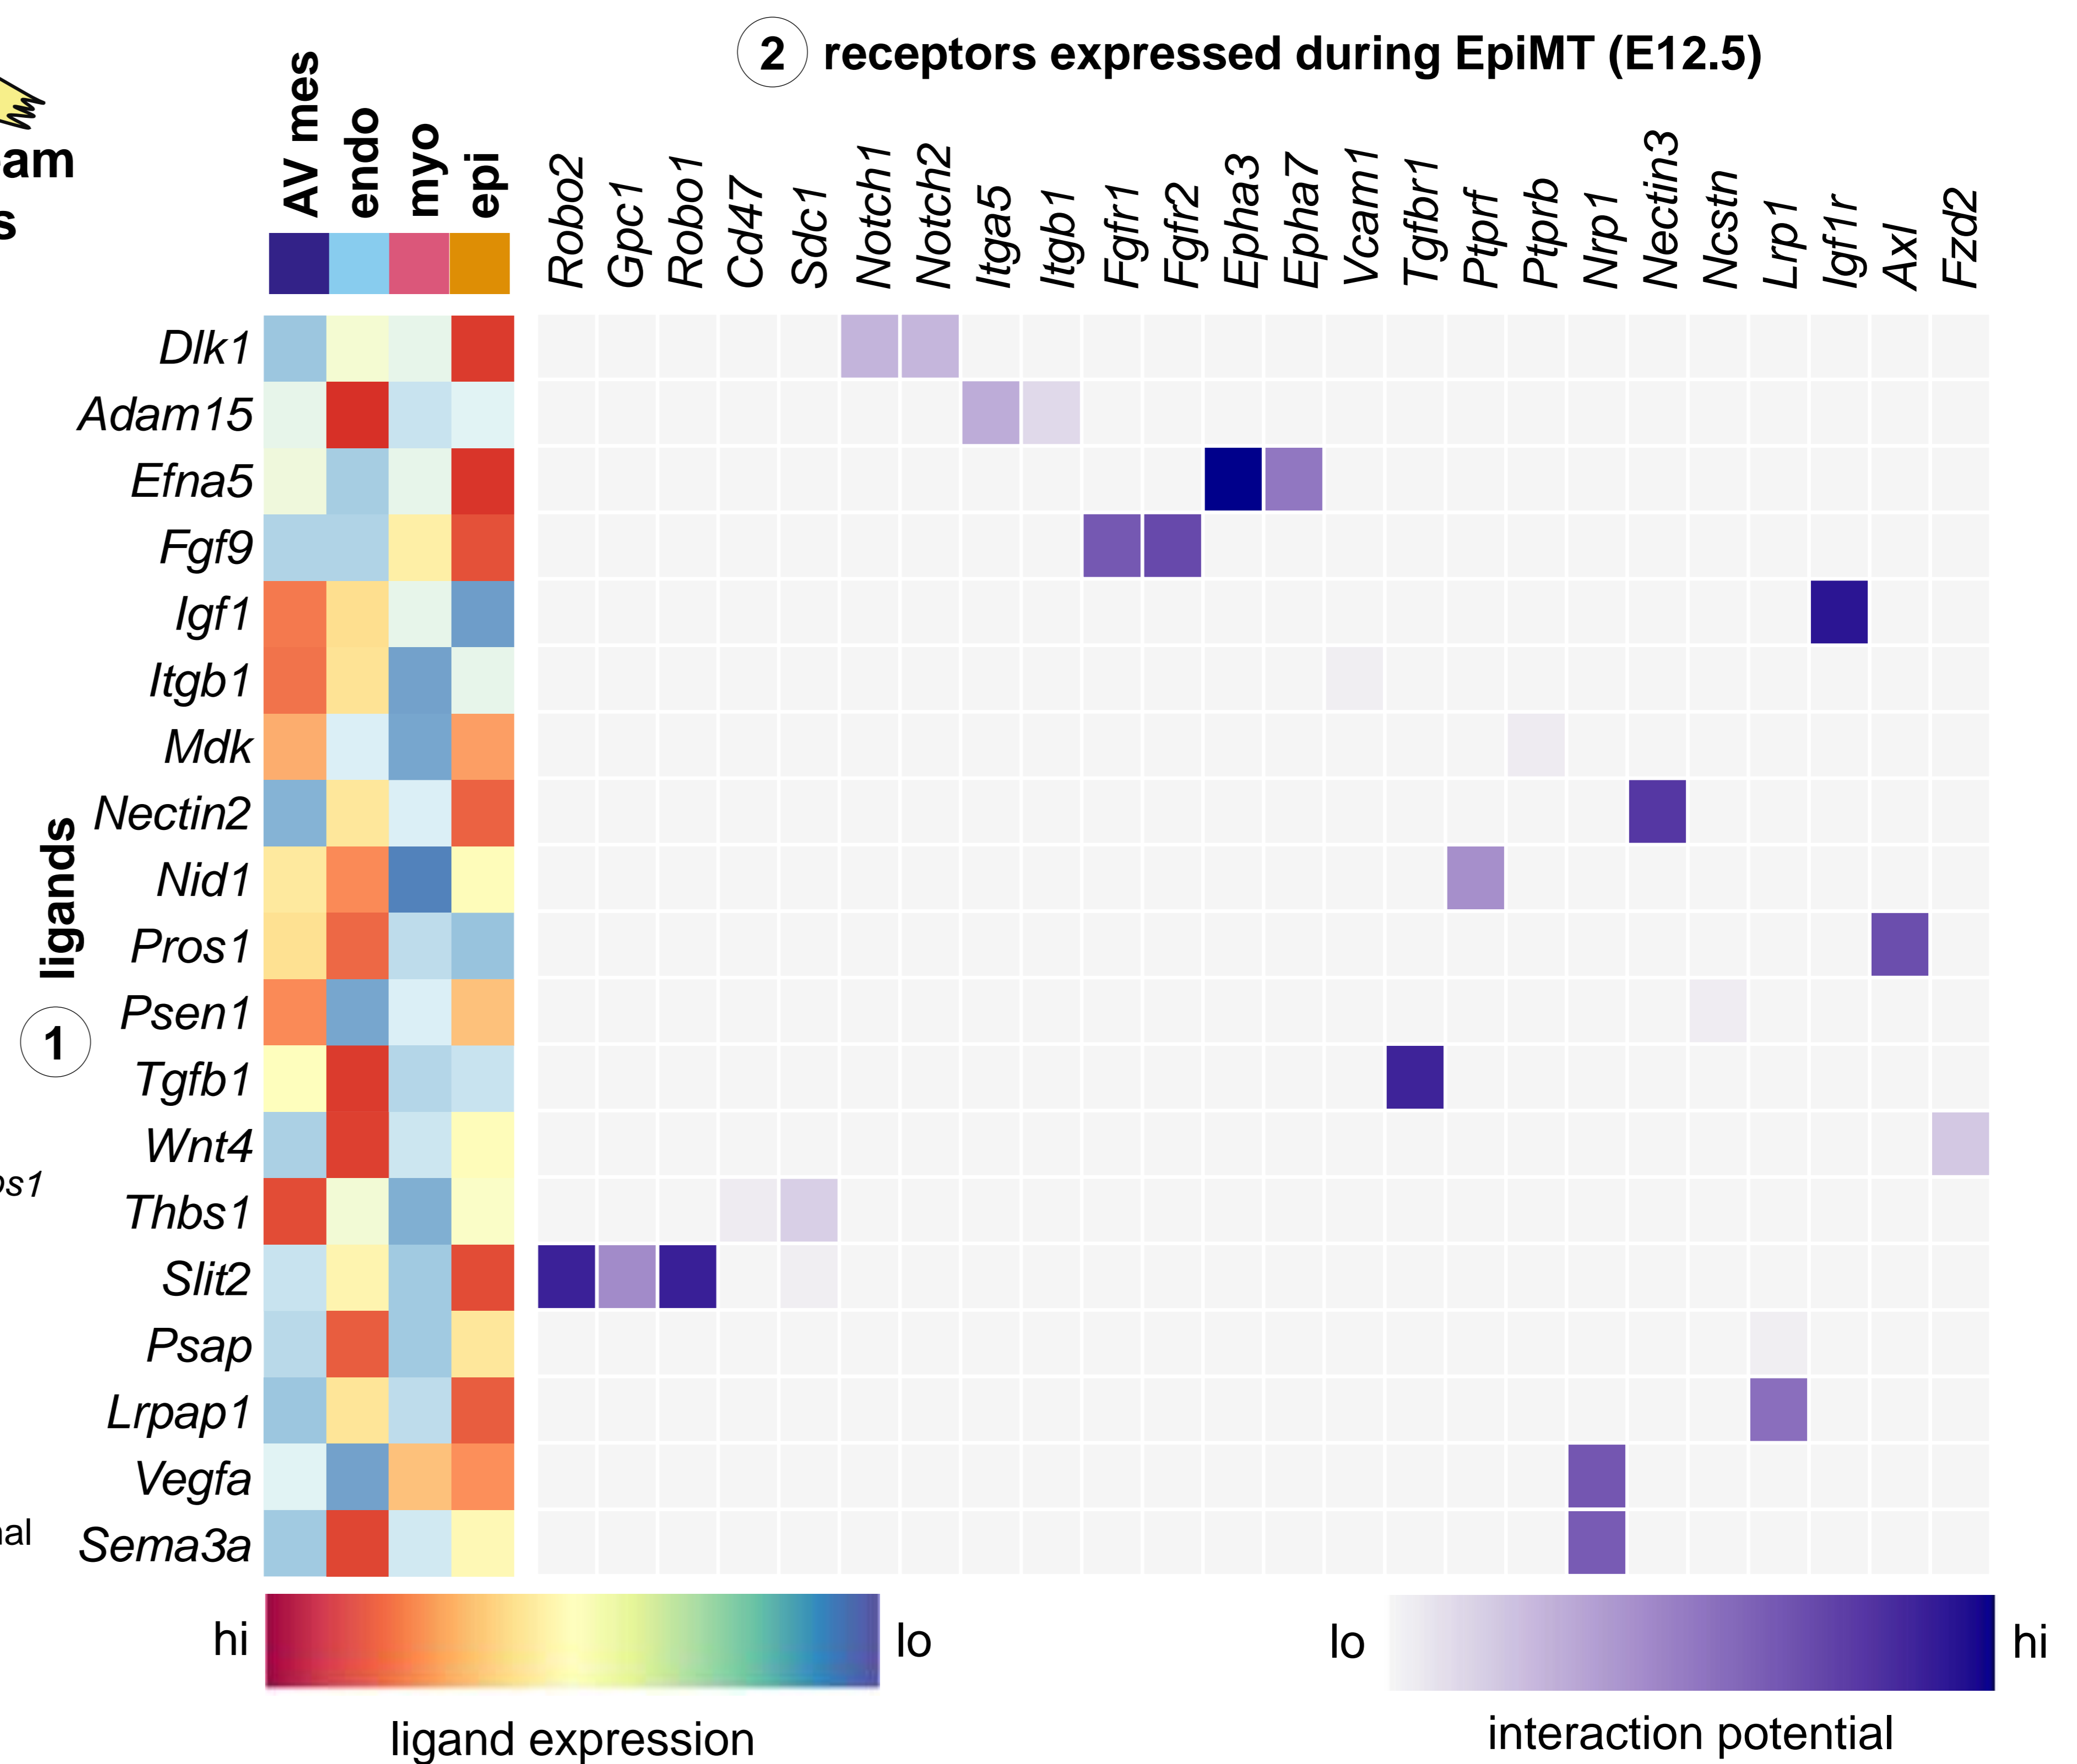

**Supplementary Figure 7.** The cell signaling microenvironment of the atrioventricular canal. Related to Fig. 7.

(a) Schematic overview of EndMT signaling analysis, showing sender populations at E10.5 that may secrete (1) ligands to bind to (2) receptors expressed by endocardium, and stimulate (3) downstream target genes upregulated during EndMT. (b) Circle plots depicting links between (1) ligands and (3) downstream target genes upregulated during EndMT. (c) Schematic overview of EpiMT signaling analysis, showing sender populations at E12.5 that may secrete (1) ligands to bind to (2) receptors expressed by epicardium, and stimulate (3) downstream target genes upregulated during EpiMT. (d) Circle plots depicting links between (1) ligands and (3) downstream target genes upregulated during EpiMT. (e) Schematic overview of AV mesenchymal cell proliferation signaling analysis, showing sender populations at E12.5 that may secrete (1) ligands to bind to (2) receptors expressed by AV mesenchyme, and stimulate (3) downstream target genes upregulated in this proliferative state. (f) Circle plots depicting links between (1) ligands and (3) downstream target genes upregulated during AV mesenchymal cell proliferation. (g) A heatmap displaying select ligand-receptor interactions signaling toward AV mesenchymal cells at E12.5 that may promote cell proliferation, including scaled and log-normalized expression of ligands from sender populations. For circle plots, link colours indicate ligand sender populations, whereas width and opacity of links correlate to ligand-receptor interaction weights and ligand activity scores, respectively. AV, atrioventricular; endo, endocardium; epi, epicardium; myo, myocardium.
